# Supplementary material
Source: Research Square preprint supplement (doi:10.21203/rs.3.rs-9865534/v1)
Supplement: Supplementary file 1 [file 0a5b657eca79427b6228d784.xlsx]

## Sheet: Original_17_Run_Data
Run	X1_HAP_DZ_ratio	X2_Dispersion_volume_mL	X3_Loading_time_h	x1_coded	x2_coded	x3_coded	Particle_size_nm	Entrapment_efficiency_percent	Zeta_potential_mV
1	3	40	12	1	0	-1	142.15	66.54	-18.88
2	2	40	18	0	0	0	140.01	72.99	-20.39
3	2	40	18	0	0	0	139.65	78.29	-20.42
4	2	40	18	0	0	0	138.99	76.99	-21.51
5	2	30	12	0	-1	-1	136.9	63.91	-18.33
6	1	30	18	-1	-1	0	140.47	67.13	-17.45
7	3	40	24	1	0	1	143.17	63.13	-19.04
8	2	50	12	0	1	-1	139.59	65.89	-20.07
9	3	30	18	1	-1	0	140.01	68.54	-19.45
10	2	30	24	0	-1	1	139.91	76.51	-20.3
11	2	40	18	0	0	0	138.97	68.29	-21.42
12	2	40	18	0	0	0	139.65	79.05	-20.6
13	1	50	18	-1	1	0	136.28	65.85	-19.64
14	2	50	24	0	1	1	129.2	87.22	-22.72
15	1	40	12	-1	0	-1	148.73	63.46	-19.18
16	1	40	24	-1	0	1	139.62	78.47	-20.31
17	3	50	18	1	1	0	134.58	66.18	-18.09

## Sheet: Descriptor_Matrix
A	B	C	A2	B2	C2	AB	AC	BC	logA	logB	logC	sqrtC	A_div_B	C_div_B	AC_div_B
3	40	12	9	1600	144	120	36	480	1.09861	3.68888	2.48491	3.4641	0.075	0.3	0.9
2	40	18	4	1600	324	80	36	720	0.693147	3.68888	2.89037	4.24264	0.05	0.45	0.9
2	40	18	4	1600	324	80	36	720	0.693147	3.68888	2.89037	4.24264	0.05	0.45	0.9
2	40	18	4	1600	324	80	36	720	0.693147	3.68888	2.89037	4.24264	0.05	0.45	0.9
2	30	12	4	900	144	60	24	360	0.693147	3.4012	2.48491	3.4641	0.0666667	0.4	0.8
1	30	18	1	900	324	30	18	540	0	3.4012	2.89037	4.24264	0.0333333	0.6	0.6
3	40	24	9	1600	576	120	72	960	1.09861	3.68888	3.17805	4.89898	0.075	0.6	1.8
2	50	12	4	2500	144	100	24	600	0.693147	3.91202	2.48491	3.4641	0.04	0.24	0.48
3	30	18	9	900	324	90	54	540	1.09861	3.4012	2.89037	4.24264	0.1	0.6	1.8
2	30	24	4	900	576	60	48	720	0.693147	3.4012	3.17805	4.89898	0.0666667	0.8	1.6
2	40	18	4	1600	324	80	36	720	0.693147	3.68888	2.89037	4.24264	0.05	0.45	0.9
2	40	18	4	1600	324	80	36	720	0.693147	3.68888	2.89037	4.24264	0.05	0.45	0.9
1	50	18	1	2500	324	50	18	900	0	3.91202	2.89037	4.24264	0.02	0.36	0.36
2	50	24	4	2500	576	100	48	1200	0.693147	3.91202	3.17805	4.89898	0.04	0.48	0.96
1	40	12	1	1600	144	40	12	480	0	3.68888	2.48491	3.4641	0.025	0.3	0.3
1	40	24	1	1600	576	40	24	960	0	3.68888	3.17805	4.89898	0.025	0.6	0.6
3	50	18	9	2500	324	150	54	900	1.09861	3.91202	2.89037	4.24264	0.06	0.36	1.08

## Sheet: External_Validation
Batch	X1_HAP_DZ_ratio	X2_Dispersion_volume_mL	X3_Loading_time_h	Particle_size_nm	Entrapment_efficiency_percent	Zeta_potential_mV
Reported_optimized_batch	2	50	20	129.3	87.22	-20.9

## Sheet: Descriptor_Correlation
Descriptor	Abs_Correlation	Response
BC	0.562554	Particle_size_nm
B2	0.437152	Particle_size_nm
B	0.390881	Particle_size_nm
logC	0.358792	Particle_size_nm
sqrtC	0.351508	Particle_size_nm
C	0.342797	Particle_size_nm
logB	0.340853	Particle_size_nm
C2	0.322069	Particle_size_nm
AB	0.280332	Particle_size_nm
AC	0.219403	Particle_size_nm
logA	0.174039	Particle_size_nm
A	0.115004	Particle_size_nm
A2	0.0547559	Particle_size_nm
AC_div_B	0.0443638	Particle_size_nm
A_div_B	0.0391733	Particle_size_nm
C_div_B	0.0291494	Particle_size_nm
logC	0.572266	Entrapment_efficiency_percent
sqrtC	0.571768	Entrapment_efficiency_percent
C	0.569089	Entrapment_efficiency_percent
C2	0.557613	Entrapment_efficiency_percent
BC	0.539596	Entrapment_efficiency_percent
C_div_B	0.345547	Entrapment_efficiency_percent
A2	0.219686	Entrapment_efficiency_percent
A_div_B	0.168443	Entrapment_efficiency_percent
AC	0.139748	Entrapment_efficiency_percent
A	0.131492	Entrapment_efficiency_percent
logB	0.124355	Entrapment_efficiency_percent
B	0.113118	Entrapment_efficiency_percent
B2	0.101064	Entrapment_efficiency_percent
AC_div_B	0.0737982	Entrapment_efficiency_percent
AB	0.0691809	Entrapment_efficiency_percent
logA	0.0347131	Entrapment_efficiency_percent
BC	0.515194	Zeta_potential_mV
sqrtC	0.391342	Zeta_potential_mV
C	0.391333	Zeta_potential_mV
logC	0.38988	Zeta_potential_mV
C2	0.387011	Zeta_potential_mV
logB	0.353309	Zeta_potential_mV
B	0.330415	Zeta_potential_mV
B2	0.305031	Zeta_potential_mV
A2	0.185744	Zeta_potential_mV
A_div_B	0.178812	Zeta_potential_mV
AC	0.134981	Zeta_potential_mV
A	0.0741612	Zeta_potential_mV
C_div_B	0.072841	Zeta_potential_mV
logA	0.0450959	Zeta_potential_mV
AB	0.0285178	Zeta_potential_mV
AC_div_B	0.0241122	Zeta_potential_mV

## Sheet: All_Subset_Search
Response	Model	Descriptors	Number_of_descriptors	LOOCV_RMSE	LOOCV_MAE	LOOCV_R2	Penalized_score
Particle_size_nm	Descriptor_Ridge	BC, B2	2	4.0746	2.68043	-0.108668	4.40057
Particle_size_nm	Descriptor_Ridge	BC, B	2	4.11727	2.68726	-0.132012	4.44666
Particle_size_nm	Descriptor_Ridge	BC, logC	2	4.11566	2.69932	-0.131123	4.44491
Particle_size_nm	Descriptor_Ridge	BC, sqrtC	2	4.08679	2.68791	-0.115314	4.41374
Particle_size_nm	Descriptor_Ridge	BC, C	2	4.06112	2.67825	-0.101346	4.38601
Particle_size_nm	Descriptor_Ridge	BC, logB	2	4.13994	2.76142	-0.144508	4.47113
Particle_size_nm	Descriptor_Ridge	BC, C2	2	4.02622	2.66308	-0.0824956	4.34832
Particle_size_nm	Descriptor_Ridge	BC, AB	2	4.15619	2.80418	-0.153513	4.48869
Particle_size_nm	Descriptor_Ridge	BC, AC	2	4.4895	2.95379	-0.345946	4.84866
Particle_size_nm	Descriptor_Ridge	B2, B	2	3.95831	2.63916	-0.0462879	4.27498
Particle_size_nm	Descriptor_Ridge	B2, logC	2	4.20093	2.67256	-0.178481	4.53701
Particle_size_nm	Descriptor_Ridge	B2, sqrtC	2	4.20047	2.71399	-0.178225	4.53651
Particle_size_nm	Descriptor_Ridge	B2, C	2	4.20286	2.75404	-0.179563	4.53909
Particle_size_nm	Descriptor_Ridge	B2, logB	2	3.83939	2.4711	0.015634	4.14654
Particle_size_nm	Descriptor_Ridge	B2, C2	2	4.21562	2.82388	-0.186736	4.55287
Particle_size_nm	Descriptor_Ridge	B2, AB	2	4.22852	2.94513	-0.194009	4.5668
Particle_size_nm	Descriptor_Ridge	B2, AC	2	4.47633	3.00106	-0.338062	4.83444
Particle_size_nm	Descriptor_Ridge	B, logC	2	4.31535	2.76326	-0.243552	4.66058
Particle_size_nm	Descriptor_Ridge	B, sqrtC	2	4.31439	2.80499	-0.242999	4.65954
Particle_size_nm	Descriptor_Ridge	B, C	2	4.31613	2.84534	-0.243998	4.66142
Particle_size_nm	Descriptor_Ridge	B, logB	2	4.01836	2.6883	-0.0782716	4.33982
Particle_size_nm	Descriptor_Ridge	B, C2	2	4.32729	2.91566	-0.250442	4.67347
Particle_size_nm	Descriptor_Ridge	B, AB	2	4.31626	3.01642	-0.244073	4.66156
Particle_size_nm	Descriptor_Ridge	B, AC	2	4.57622	3.06396	-0.398442	4.94231
Particle_size_nm	Descriptor_Ridge	logC, sqrtC	2	4.33047	3.10178	-0.252282	4.67691
Particle_size_nm	Descriptor_Ridge	logC, C	2	4.36558	3.12134	-0.272667	4.71482
Particle_size_nm	Descriptor_Ridge	logC, logB	2	4.41385	2.84605	-0.300965	4.76695
Particle_size_nm	Descriptor_Ridge	logC, C2	2	4.44711	3.16759	-0.320648	4.80288
Particle_size_nm	Descriptor_Ridge	logC, AB	2	4.45953	3.11109	-0.328035	4.81629
Particle_size_nm	Descriptor_Ridge	logC, AC	2	4.7148	3.37136	-0.484421	5.09198
Particle_size_nm	Descriptor_Ridge	sqrtC, C	2	4.35138	3.10832	-0.264404	4.69949
Particle_size_nm	Descriptor_Ridge	sqrtC, logB	2	4.41287	2.87424	-0.300388	4.7659
Particle_size_nm	Descriptor_Ridge	sqrtC, C2	2	4.42192	3.14714	-0.305727	4.77567
Particle_size_nm	Descriptor_Ridge	sqrtC, AB	2	4.49214	3.13283	-0.347527	4.85151
Particle_size_nm	Descriptor_Ridge	sqrtC, AC	2	4.74239	3.38171	-0.501847	5.12178
Particle_size_nm	Descriptor_Ridge	C, logB	2	4.41444	2.91508	-0.301315	4.76759
Particle_size_nm	Descriptor_Ridge	C, C2	2	4.40309	3.12766	-0.294633	4.75534
Particle_size_nm	Descriptor_Ridge	C, AB	2	4.52701	3.15202	-0.368531	4.88917
Particle_size_nm	Descriptor_Ridge	C, AC	2	4.77336	3.39058	-0.521528	5.15523
Particle_size_nm	Descriptor_Ridge	logB, C2	2	4.42489	2.98623	-0.307486	4.77888
Particle_size_nm	Descriptor_Ridge	logB, AB	2	4.38792	3.0541	-0.285729	4.73896
Particle_size_nm	Descriptor_Ridge	logB, AC	2	4.66318	3.09614	-0.452097	5.03623
Particle_size_nm	Descriptor_Ridge	C2, AB	2	4.59724	3.17972	-0.41132	4.96502
Particle_size_nm	Descriptor_Ridge	C2, AC	2	4.83888	3.40136	-0.563582	5.22599
Particle_size_nm	Descriptor_Ridge	AB, AC	2	4.67723	3.13657	-0.460862	5.05141
Particle_size_nm	Descriptor_Ridge	BC, B2, B	3	4.0159	2.58654	-0.0769532	4.49781
Particle_size_nm	Descriptor_Ridge	BC, B2, logC	3	4.30007	2.76717	-0.234763	4.81608
Particle_size_nm	Descriptor_Ridge	BC, B2, sqrtC	3	4.23365	2.7527	-0.19691	4.74169
Particle_size_nm	Descriptor_Ridge	BC, B2, C	3	4.173	2.73756	-0.162861	4.67376
Particle_size_nm	Descriptor_Ridge	BC, B2, logB	3	3.83504	2.43024	0.0178622	4.29525
Particle_size_nm	Descriptor_Ridge	BC, B2, C2	3	4.09672	2.71367	-0.120738	4.58833
Particle_size_nm	Descriptor_Ridge	BC, B2, AB	3	4.38185	2.94212	-0.282175	4.90768
Particle_size_nm	Descriptor_Ridge	BC, B2, AC	3	4.51127	2.96524	-0.359033	5.05263
Particle_size_nm	Descriptor_Ridge	BC, B, logC	3	4.32476	2.80346	-0.248981	4.84373
Particle_size_nm	Descriptor_Ridge	BC, B, sqrtC	3	4.24293	2.77239	-0.202164	4.75208
Particle_size_nm	Descriptor_Ridge	BC, B, C	3	4.16779	2.74374	-0.15996	4.66792
Particle_size_nm	Descriptor_Ridge	BC, B, logB	3	4.044	2.62808	-0.0920799	4.52928
Particle_size_nm	Descriptor_Ridge	BC, B, C2	3	4.07384	2.70764	-0.108252	4.5627
Particle_size_nm	Descriptor_Ridge	BC, B, AB	3	4.42052	2.93879	-0.304903	4.95098
Particle_size_nm	Descriptor_Ridge	BC, B, AC	3	4.56684	2.98641	-0.392716	5.11486
Particle_size_nm	Descriptor_Ridge	BC, logC, sqrtC	3	4.11699	2.70537	-0.131856	4.61103
Particle_size_nm	Descriptor_Ridge	BC, logC, C	3	4.12712	2.71219	-0.137434	4.62238
Particle_size_nm	Descriptor_Ridge	BC, logC, logB	3	4.26604	2.81022	-0.215292	4.77796
Particle_size_nm	Descriptor_Ridge	BC, logC, C2	3	4.18223	2.73773	-0.168012	4.6841
Particle_size_nm	Descriptor_Ridge	BC, logC, AB	3	4.43663	2.94815	-0.314433	4.96903
Particle_size_nm	Descriptor_Ridge	BC, logC, AC	3	4.55455	2.99327	-0.385232	5.1011
Particle_size_nm	Descriptor_Ridge	BC, sqrtC, C	3	4.08952	2.69548	-0.116804	4.58027
Particle_size_nm	Descriptor_Ridge	BC, sqrtC, logB	3	4.16954	2.74507	-0.160935	4.66988
Particle_size_nm	Descriptor_Ridge	BC, sqrtC, C2	3	4.13282	2.71673	-0.140579	4.62876
Particle_size_nm	Descriptor_Ridge	BC, sqrtC, AB	3	4.41009	2.93745	-0.29875	4.9393
Particle_size_nm	Descriptor_Ridge	BC, sqrtC, AC	3	4.51933	2.97647	-0.363893	5.06165
Particle_size_nm	Descriptor_Ridge	BC, C, logB	3	4.08267	2.70093	-0.113065	4.57259
Particle_size_nm	Descriptor_Ridge	BC, C, C2	3	4.08475	2.69539	-0.114197	4.57492
Particle_size_nm	Descriptor_Ridge	BC, C, AB	3	4.38348	2.92623	-0.283129	4.9095
Particle_size_nm	Descriptor_Ridge	BC, C, AC	3	4.48768	2.96341	-0.344855	5.0262
Particle_size_nm	Descriptor_Ridge	BC, logB, C2	3	3.98002	2.64163	-0.0577952	4.45762
Particle_size_nm	Descriptor_Ridge	BC, logB, AB	3	4.42478	2.99651	-0.307421	4.95576
Particle_size_nm	Descriptor_Ridge	BC, logB, AC	3	4.59706	3.0599	-0.411209	5.1487
Particle_size_nm	Descriptor_Ridge	BC, C2, AB	3	4.33822	2.90478	-0.256764	4.8588
Particle_size_nm	Descriptor_Ridge	BC, C2, AC	3	4.44407	2.94092	-0.318841	4.97735
Particle_size_nm	Descriptor_Ridge	BC, AB, AC	3	4.41275	3.02118	-0.300319	4.94228
Particle_size_nm	Descriptor_Ridge	B2, B, logC	3	4.19219	2.65722	-0.173581	4.69525
Particle_size_nm	Descriptor_Ridge	B2, B, sqrtC	3	4.19102	2.69903	-0.172927	4.69394
Particle_size_nm	Descriptor_Ridge	B2, B, C	3	4.19267	2.73939	-0.173851	4.69579
Particle_size_nm	Descriptor_Ridge	B2, B, logB	3	3.84215	2.47616	0.0142194	4.30321
Particle_size_nm	Descriptor_Ridge	B2, B, C2	3	4.20401	2.80957	-0.18021	4.70849
Particle_size_nm	Descriptor_Ridge	B2, B, AB	3	4.20703	2.91232	-0.181904	4.71187
Particle_size_nm	Descriptor_Ridge	B2, B, AC	3	4.45834	2.96891	-0.327327	4.99334
Particle_size_nm	Descriptor_Ridge	B2, logC, sqrtC	3	4.22738	2.70036	-0.193366	4.73466
Particle_size_nm	Descriptor_Ridge	B2, logC, C	3	4.2566	2.71867	-0.20992	4.76739
Particle_size_nm	Descriptor_Ridge	B2, logC, logB	3	4.05876	2.5263	-0.100064	4.54581
Particle_size_nm	Descriptor_Ridge	B2, logC, C2	3	4.3368	2.73846	-0.255944	4.85722
Particle_size_nm	Descriptor_Ridge	B2, logC, AB	3	4.48308	2.91729	-0.3421	5.02105
Particle_size_nm	Descriptor_Ridge	B2, logC, AC	3	4.56624	2.93625	-0.392354	5.11419
Particle_size_nm	Descriptor_Ridge	B2, sqrtC, C	3	4.22761	2.74116	-0.1935	4.73493
Particle_size_nm	Descriptor_Ridge	B2, sqrtC, logB	3	4.05863	2.56941	-0.0999951	4.54567
Particle_size_nm	Descriptor_Ridge	B2, sqrtC, C2	3	4.2943	2.76202	-0.231448	4.80962
Particle_size_nm	Descriptor_Ridge	B2, sqrtC, AB	3	4.49682	2.96663	-0.35034	5.03644
Particle_size_nm	Descriptor_Ridge	B2, sqrtC, AC	3	4.57555	2.9819	-0.398033	5.12461
Particle_size_nm	Descriptor_Ridge	B2, C, logB	3	4.06136	2.6213	-0.101475	4.54872
Particle_size_nm	Descriptor_Ridge	B2, C, C2	3	4.25746	2.78886	-0.210413	4.76836
Particle_size_nm	Descriptor_Ridge	B2, C, AB	3	4.51332	3.0144	-0.360266	5.05492
Particle_size_nm	Descriptor_Ridge	B2, C, AC	3	4.58885	3.02595	-0.406175	5.13951
Particle_size_nm	Descriptor_Ridge	B2, logB, C2	3	4.07473	2.72638	-0.108737	4.56369
Particle_size_nm	Descriptor_Ridge	B2, logB, AB	3	4.07328	2.75386	-0.107948	4.56207
Particle_size_nm	Descriptor_Ridge	B2, logB, AC	3	4.32491	2.81356	-0.249064	4.84389
Particle_size_nm	Descriptor_Ridge	B2, C2, AB	3	4.55127	3.09784	-0.38324	5.09743
Particle_size_nm	Descriptor_Ridge	B2, C2, AC	3	4.62431	3.10042	-0.427989	5.17922
Particle_size_nm	Descriptor_Ridge	B2, AB, AC	3	4.64428	3.07276	-0.440353	5.2016
Particle_size_nm	Descriptor_Ridge	B, logC, sqrtC	3	4.34325	2.79207	-0.259682	4.86444
Particle_size_nm	Descriptor_Ridge	B, logC, C	3	4.37353	2.81147	-0.277308	4.89835
Particle_size_nm	Descriptor_Ridge	B, logC, logB	3	4.28779	2.73301	-0.227717	4.80232
Particle_size_nm	Descriptor_Ridge	B, logC, C2	3	4.45671	2.83402	-0.326359	4.99152
Particle_size_nm	Descriptor_Ridge	B, logC, AB	3	4.60146	3.01561	-0.413914	5.15364
Particle_size_nm	Descriptor_Ridge	B, logC, AC	3	4.69355	3.0404	-0.471073	5.25678
Particle_size_nm	Descriptor_Ridge	B, sqrtC, C	3	4.34293	2.83317	-0.259495	4.86408
Particle_size_nm	Descriptor_Ridge	B, sqrtC, logB	3	4.28647	2.77525	-0.226964	4.80085
Particle_size_nm	Descriptor_Ridge	B, sqrtC, C2	3	4.41214	2.85638	-0.299958	4.94159
Particle_size_nm	Descriptor_Ridge	B, sqrtC, AB	3	4.61527	3.06488	-0.422414	5.1691
Particle_size_nm	Descriptor_Ridge	B, sqrtC, AC	3	4.70285	3.08638	-0.476907	5.26719
Particle_size_nm	Descriptor_Ridge	B, C, logB	3	4.28784	2.81602	-0.227744	4.80238
Particle_size_nm	Descriptor_Ridge	B, C, C2	3	4.37308	2.8821	-0.277047	4.89785
Particle_size_nm	Descriptor_Ridge	B, C, AB	3	4.63172	3.11257	-0.432569	5.18752
Particle_size_nm	Descriptor_Ridge	B, C, AC	3	4.71606	3.1308	-0.485215	5.28198
Particle_size_nm	Descriptor_Ridge	B, logB, C2	3	4.29826	2.8869	-0.233721	4.81405
Particle_size_nm	Descriptor_Ridge	B, logB, AB	3	4.27768	2.96395	-0.221937	4.79101
Particle_size_nm	Descriptor_Ridge	B, logB, AC	3	4.54155	3.0126	-0.377336	5.08654
Particle_size_nm	Descriptor_Ridge	B, C2, AB	3	4.66928	3.19585	-0.455902	5.2296
Particle_size_nm	Descriptor_Ridge	B, C2, AC	3	4.75102	3.20601	-0.50732	5.32114
Particle_size_nm	Descriptor_Ridge	B, AB, AC	3	4.78486	3.20075	-0.528869	5.35904
Particle_size_nm	Descriptor_Ridge	logC, sqrtC, C	3	4.37032	3.12677	-0.275434	4.89476
Particle_size_nm	Descriptor_Ridge	logC, sqrtC, logB	3	4.44316	2.87761	-0.318303	4.97634
Particle_size_nm	Descriptor_Ridge	logC, sqrtC, C2	3	4.45332	3.17544	-0.324339	4.98772
Particle_size_nm	Descriptor_Ridge	logC, sqrtC, AB	3	4.50009	3.14281	-0.352305	5.04011
Particle_size_nm	Descriptor_Ridge	logC, sqrtC, AC	3	4.74855	3.39965	-0.50575	5.31837
Particle_size_nm	Descriptor_Ridge	logC, C, logB	3	4.47439	2.89546	-0.336901	5.01132
Particle_size_nm	Descriptor_Ridge	logC, C, C2	3	4.45201	3.17308	-0.323559	4.98625
Particle_size_nm	Descriptor_Ridge	logC, C, AB	3	4.54136	3.16403	-0.377223	5.08633
Particle_size_nm	Descriptor_Ridge	logC, C, AC	3	4.78792	3.4227	-0.530822	5.36247
Particle_size_nm	Descriptor_Ridge	logC, logB, C2	3	4.55994	2.92571	-0.388515	5.10714
Particle_size_nm	Descriptor_Ridge	logC, logB, AB	3	4.69719	3.08855	-0.473354	5.26085
Particle_size_nm	Descriptor_Ridge	logC, logB, AC	3	4.80386	3.13284	-0.541033	5.38032
Particle_size_nm	Descriptor_Ridge	logC, C2, AB	3	4.63099	3.20444	-0.432117	5.1867
Particle_size_nm	Descriptor_Ridge	logC, C2, AC	3	4.87599	3.47614	-0.587662	5.46111
Particle_size_nm	Descriptor_Ridge	logC, AB, AC	3	4.34043	2.91005	-0.25805	4.86129
Particle_size_nm	Descriptor_Ridge	sqrtC, C, logB	3	4.44276	2.90341	-0.318068	4.97589
Particle_size_nm	Descriptor_Ridge	sqrtC, C, C2	3	4.42586	3.15332	-0.308057	4.95696
Particle_size_nm	Descriptor_Ridge	sqrtC, C, AB	3	4.53362	3.16345	-0.372529	5.07765
Particle_size_nm	Descriptor_Ridge	sqrtC, C, AC	3	4.77799	3.40985	-0.524482	5.35135
Particle_size_nm	Descriptor_Ridge	sqrtC, logB, C2	3	4.51401	2.92855	-0.360679	5.05569
Particle_size_nm	Descriptor_Ridge	sqrtC, logB, AB	3	4.71134	3.13201	-0.482246	5.2767
Particle_size_nm	Descriptor_Ridge	sqrtC, logB, AC	3	4.81344	3.16578	-0.547188	5.39105
Particle_size_nm	Descriptor_Ridge	sqrtC, C2, AB	3	4.61234	3.19895	-0.420611	5.16583
Particle_size_nm	Descriptor_Ridge	sqrtC, C2, AC	3	4.85556	3.45534	-0.57438	5.43822
Particle_size_nm	Descriptor_Ridge	sqrtC, AB, AC	3	4.37485	2.97081	-0.278081	4.89983
Particle_size_nm	Descriptor_Ridge	C, logB, C2	3	4.4735	2.9536	-0.336372	5.01032
Particle_size_nm	Descriptor_Ridge	C, logB, AB	3	4.72802	3.17984	-0.492762	5.29539
Particle_size_nm	Descriptor_Ridge	C, logB, AC	3	4.82685	3.21076	-0.555822	5.40608
Particle_size_nm	Descriptor_Ridge	C, C2, AB	3	4.60133	3.19507	-0.413836	5.15349
Particle_size_nm	Descriptor_Ridge	C, C2, AC	3	4.84249	3.43606	-0.565921	5.42359
Particle_size_nm	Descriptor_Ridge	C, AB, AC	3	4.42205	3.0425	-0.305804	4.95269
Particle_size_nm	Descriptor_Ridge	logB, C2, AB	3	4.76575	3.26327	-0.516682	5.33764
Particle_size_nm	Descriptor_Ridge	logB, C2, AC	3	4.86188	3.28699	-0.578486	5.44531
Particle_size_nm	Descriptor_Ridge	logB, AB, AC	3	4.89644	3.2863	-0.601004	5.48401
Particle_size_nm	Descriptor_Ridge	C2, AB, AC	3	4.5421	3.19279	-0.37767	5.08715
Particle_size_nm	Descriptor_Ridge	BC, B2, B, logC	4	4.2581	2.70798	-0.210774	4.9394
Particle_size_nm	Descriptor_Ridge	BC, B2, B, sqrtC	4	4.17746	2.67413	-0.16535	4.84586
Particle_size_nm	Descriptor_Ridge	BC, B2, B, C	4	4.10216	2.645	-0.123719	4.75851
Particle_size_nm	Descriptor_Ridge	BC, B2, B, logB	4	3.83712	2.43224	0.0167987	4.45106
Particle_size_nm	Descriptor_Ridge	BC, B2, B, C2	4	4.00535	2.59521	-0.0713039	4.64621
Particle_size_nm	Descriptor_Ridge	BC, B2, B, AB	4	4.32225	2.84027	-0.247533	5.01381
Particle_size_nm	Descriptor_Ridge	BC, B2, B, AC	4	4.45082	2.87488	-0.322851	5.16295
Particle_size_nm	Descriptor_Ridge	BC, B2, logC, sqrtC	4	4.31018	2.77543	-0.240574	4.99981
Particle_size_nm	Descriptor_Ridge	BC, B2, logC, C	4	4.2974	2.76991	-0.233226	4.98498
Particle_size_nm	Descriptor_Ridge	BC, B2, logC, logB	4	4.05174	2.54762	-0.0962645	4.70002
Particle_size_nm	Descriptor_Ridge	BC, B2, logC, C2	4	4.32179	2.767	-0.247263	5.01327
Particle_size_nm	Descriptor_Ridge	BC, B2, logC, AB	4	4.61817	3.03841	-0.424199	5.35707
Particle_size_nm	Descriptor_Ridge	BC, B2, logC, AC	4	4.70628	3.05419	-0.479067	5.45929
Particle_size_nm	Descriptor_Ridge	BC, B2, sqrtC, C	4	4.23628	2.7584	-0.198395	4.91408
Particle_size_nm	Descriptor_Ridge	BC, B2, sqrtC, logB	4	3.96247	2.49494	-0.0484882	4.59647
Particle_size_nm	Descriptor_Ridge	BC, B2, sqrtC, C2	4	4.25055	2.75431	-0.206486	4.93064
Particle_size_nm	Descriptor_Ridge	BC, B2, sqrtC, AB	4	4.55749	3.02493	-0.387018	5.28668
Particle_size_nm	Descriptor_Ridge	BC, B2, sqrtC, AC	4	4.64199	3.03879	-0.438928	5.3847
Particle_size_nm	Descriptor_Ridge	BC, B2, C, logB	4	3.87829	2.42596	-0.00441412	4.49882
Particle_size_nm	Descriptor_Ridge	BC, B2, C, C2	4	4.18085	2.74019	-0.167244	4.84979
Particle_size_nm	Descriptor_Ridge	BC, B2, C, AB	4	4.50126	3.00995	-0.353008	5.22147
Particle_size_nm	Descriptor_Ridge	BC, B2, C, AC	4	4.58342	3.02201	-0.40285	5.31677
Particle_size_nm	Descriptor_Ridge	BC, B2, logB, C2	4	3.76804	2.30873	0.0518816	4.37093
Particle_size_nm	Descriptor_Ridge	BC, B2, logB, AB	4	4.1156	2.65403	-0.131092	4.7741
Particle_size_nm	Descriptor_Ridge	BC, B2, logB, AC	4	4.25746	2.69754	-0.210412	4.93866
Particle_size_nm	Descriptor_Ridge	BC, B2, C2, AB	4	4.42795	2.98416	-0.309294	5.13642
Particle_size_nm	Descriptor_Ridge	BC, B2, C2, AC	4	4.51049	2.9935	-0.358561	5.23217
Particle_size_nm	Descriptor_Ridge	BC, B2, AB, AC	4	4.51083	3.10865	-0.358765	5.23256
Particle_size_nm	Descriptor_Ridge	BC, B, logC, sqrtC	4	4.32254	2.81101	-0.247696	5.01414
Particle_size_nm	Descriptor_Ridge	BC, B, logC, C	4	4.30009	2.80563	-0.234771	4.9881
Particle_size_nm	Descriptor_Ridge	BC, B, logC, logB	4	4.23565	2.72346	-0.198042	4.91336
Particle_size_nm	Descriptor_Ridge	BC, B, logC, C2	4	4.31324	2.81679	-0.242333	5.00335
Particle_size_nm	Descriptor_Ridge	BC, B, logC, AB	4	4.64715	3.07341	-0.44213	5.39069
Particle_size_nm	Descriptor_Ridge	BC, B, logC, AC	4	4.74725	3.10028	-0.504926	5.50681
Particle_size_nm	Descriptor_Ridge	BC, B, sqrtC, C	4	4.23116	2.77662	-0.1955	4.90814
Particle_size_nm	Descriptor_Ridge	BC, B, sqrtC, logB	4	4.13914	2.66077	-0.144068	4.8014
Particle_size_nm	Descriptor_Ridge	BC, B, sqrtC, C2	4	4.23536	2.7844	-0.197878	4.91302
Particle_size_nm	Descriptor_Ridge	BC, B, sqrtC, AB	4	4.56864	3.04038	-0.393817	5.29962
Particle_size_nm	Descriptor_Ridge	BC, B, sqrtC, AC	4	4.66499	3.06648	-0.453225	5.41139
Particle_size_nm	Descriptor_Ridge	BC, B, C, logB	4	4.05013	2.61548	-0.0953936	4.69815
Particle_size_nm	Descriptor_Ridge	BC, B, C, C2	4	4.15831	2.75143	-0.154689	4.82364
Particle_size_nm	Descriptor_Ridge	BC, B, C, AB	4	4.4948	3.00865	-0.349126	5.21397
Particle_size_nm	Descriptor_Ridge	BC, B, C, AC	4	4.58897	3.03443	-0.40625	5.32321
Particle_size_nm	Descriptor_Ridge	BC, B, logB, C2	4	3.94046	2.56256	-0.0368741	4.57094
Particle_size_nm	Descriptor_Ridge	BC, B, logB, AB	4	4.34046	2.86951	-0.258063	5.03493
Particle_size_nm	Descriptor_Ridge	BC, B, logB, AC	4	4.48932	2.91914	-0.345837	5.20761
Particle_size_nm	Descriptor_Ridge	BC, B, C2, AB	4	4.39701	2.96468	-0.291058	5.10053
Particle_size_nm	Descriptor_Ridge	BC, B, C2, AC	4	4.49295	2.99146	-0.348015	5.21182
Particle_size_nm	Descriptor_Ridge	BC, B, AB, AC	4	4.45848	3.06762	-0.327412	5.17184
Particle_size_nm	Descriptor_Ridge	BC, logC, sqrtC, C	4	4.12982	2.71518	-0.138922	4.79059
Particle_size_nm	Descriptor_Ridge	BC, logC, sqrtC, logB	4	4.2382	2.78366	-0.199485	4.91631
Particle_size_nm	Descriptor_Ridge	BC, logC, sqrtC, C2	4	4.19624	2.7456	-0.175851	4.86764
Particle_size_nm	Descriptor_Ridge	BC, logC, sqrtC, AB	4	4.453	2.96061	-0.324148	5.16548
Particle_size_nm	Descriptor_Ridge	BC, logC, sqrtC, AC	4	4.54865	2.9964	-0.381646	5.27644
Particle_size_nm	Descriptor_Ridge	BC, logC, C, logB	4	4.20585	2.76728	-0.181241	4.87878
Particle_size_nm	Descriptor_Ridge	BC, logC, C, C2	4	4.18445	2.7407	-0.169252	4.85396
Particle_size_nm	Descriptor_Ridge	BC, logC, C, AB	4	4.46179	2.96618	-0.329384	5.17568
Particle_size_nm	Descriptor_Ridge	BC, logC, C, AC	4	4.55272	3.0008	-0.384118	5.28115
Particle_size_nm	Descriptor_Ridge	BC, logC, logB, C2	4	4.20755	2.7615	-0.1822	4.88076
Particle_size_nm	Descriptor_Ridge	BC, logC, logB, AB	4	4.58193	3.06614	-0.401934	5.31503
Particle_size_nm	Descriptor_Ridge	BC, logC, logB, AC	4	4.69941	3.11064	-0.474748	5.45131
Particle_size_nm	Descriptor_Ridge	BC, logC, C2, AB	4	4.50975	2.98771	-0.358115	5.23131
Particle_size_nm	Descriptor_Ridge	BC, logC, C2, AC	4	4.59623	3.02122	-0.410703	5.33163
Particle_size_nm	Descriptor_Ridge	BC, logC, AB, AC	4	4.64021	3.11658	-0.437826	5.38264
Particle_size_nm	Descriptor_Ridge	BC, sqrtC, C, logB	4	4.13184	2.73084	-0.140037	4.79294
Particle_size_nm	Descriptor_Ridge	BC, sqrtC, C, C2	4	4.13977	2.72173	-0.144416	4.80213
Particle_size_nm	Descriptor_Ridge	BC, sqrtC, C, AB	4	4.42583	2.94968	-0.308043	5.13397
Particle_size_nm	Descriptor_Ridge	BC, sqrtC, C, AC	4	4.51442	2.98306	-0.36093	5.23673
Particle_size_nm	Descriptor_Ridge	BC, sqrtC, logB, C2	4	4.12714	2.72308	-0.137446	4.78749
Particle_size_nm	Descriptor_Ridge	BC, sqrtC, logB, AB	4	4.48605	2.99519	-0.343879	5.20382
Particle_size_nm	Descriptor_Ridge	BC, sqrtC, logB, AC	4	4.59943	3.03865	-0.412666	5.33534
Particle_size_nm	Descriptor_Ridge	BC, sqrtC, C2, AB	4	4.46147	2.96686	-0.329193	5.17531
Particle_size_nm	Descriptor_Ridge	BC, sqrtC, C2, AC	4	4.54762	2.99947	-0.381017	5.27523
Particle_size_nm	Descriptor_Ridge	BC, sqrtC, AB, AC	4	4.59394	3.11359	-0.409297	5.32897
Particle_size_nm	Descriptor_Ridge	BC, C, logB, C2	4	4.04773	2.6832	-0.0940917	4.69536
Particle_size_nm	Descriptor_Ridge	BC, C, logB, AB	4	4.39702	2.94526	-0.291066	5.10054
Particle_size_nm	Descriptor_Ridge	BC, C, logB, AC	4	4.5082	2.98863	-0.357179	5.22951
Particle_size_nm	Descriptor_Ridge	BC, C, C2, AB	4	4.41336	2.94493	-0.300677	5.11949
Particle_size_nm	Descriptor_Ridge	BC, C, C2, AC	4	4.49967	2.97673	-0.352052	5.21962
Particle_size_nm	Descriptor_Ridge	BC, C, AB, AC	4	4.54943	3.10837	-0.382117	5.27734
Particle_size_nm	Descriptor_Ridge	BC, logB, C2, AB	4	4.28308	2.87285	-0.22502	4.96837
Particle_size_nm	Descriptor_Ridge	BC, logB, C2, AC	4	4.39731	2.91846	-0.291237	5.10088
Particle_size_nm	Descriptor_Ridge	BC, logB, AB, AC	4	4.31246	2.95122	-0.241887	5.00246
Particle_size_nm	Descriptor_Ridge	BC, C2, AB, AC	4	4.48429	3.09409	-0.342824	5.20178
Particle_size_nm	Descriptor_Ridge	B2, B, logC, sqrtC	4	4.21896	2.68538	-0.188616	4.89399
Particle_size_nm	Descriptor_Ridge	B2, B, logC, C	4	4.24793	2.70358	-0.204999	4.9276
Particle_size_nm	Descriptor_Ridge	B2, B, logC, logB	4	4.06294	2.52877	-0.102333	4.71301
Particle_size_nm	Descriptor_Ridge	B2, B, logC, C2	4	4.32793	2.72276	-0.250813	5.0204
Particle_size_nm	Descriptor_Ridge	B2, B, logC, AB	4	4.46785	2.89611	-0.332998	5.18271
Particle_size_nm	Descriptor_Ridge	B2, B, logC, AC	4	4.55531	2.91839	-0.385693	5.28416
Particle_size_nm	Descriptor_Ridge	B2, B, sqrtC, C	4	4.21843	2.72652	-0.188317	4.89337
Particle_size_nm	Descriptor_Ridge	B2, B, sqrtC, logB	4	4.06249	2.5718	-0.102089	4.71249
Particle_size_nm	Descriptor_Ridge	B2, B, sqrtC, C2	4	4.28475	2.74688	-0.225979	4.97031
Particle_size_nm	Descriptor_Ridge	B2, B, sqrtC, AB	4	4.48107	2.9459	-0.340895	5.19804
Particle_size_nm	Descriptor_Ridge	B2, B, sqrtC, AC	4	4.56394	2.96446	-0.39095	5.29417
Particle_size_nm	Descriptor_Ridge	B2, B, C, logB	4	4.0649	2.62366	-0.103397	4.71529
Particle_size_nm	Descriptor_Ridge	B2, B, C, C2	4	4.24727	2.77425	-0.204622	4.92683
Particle_size_nm	Descriptor_Ridge	B2, B, C, AB	4	4.49704	2.99403	-0.350471	5.21657
Particle_size_nm	Descriptor_Ridge	B2, B, C, AC	4	4.57658	3.00886	-0.398666	5.30884
Particle_size_nm	Descriptor_Ridge	B2, B, logB, C2	4	4.07769	2.72859	-0.110352	4.73012
Particle_size_nm	Descriptor_Ridge	B2, B, logB, AB	4	4.07626	2.75748	-0.109572	4.72846
Particle_size_nm	Descriptor_Ridge	B2, B, logB, AC	4	4.3274	2.81561	-0.250504	5.01978
Particle_size_nm	Descriptor_Ridge	B2, B, C2, AB	4	4.53403	3.07789	-0.372777	5.25947
Particle_size_nm	Descriptor_Ridge	B2, B, C2, AC	4	4.61087	3.08371	-0.419702	5.34861
Particle_size_nm	Descriptor_Ridge	B2, B, AB, AC	4	4.64889	3.06363	-0.443215	5.39272
Particle_size_nm	Descriptor_Ridge	B2, logC, sqrtC, C	4	4.26216	2.72127	-0.213082	4.9441
Particle_size_nm	Descriptor_Ridge	B2, logC, sqrtC, logB	4	4.08576	2.55467	-0.114751	4.73948
Particle_size_nm	Descriptor_Ridge	B2, logC, sqrtC, C2	4	4.34963	2.73133	-0.263384	5.04557
Particle_size_nm	Descriptor_Ridge	B2, logC, sqrtC, AB	4	4.51806	2.95006	-0.363124	5.24095
Particle_size_nm	Descriptor_Ridge	B2, logC, sqrtC, AC	4	4.59407	2.96617	-0.409376	5.32912
Particle_size_nm	Descriptor_Ridge	B2, logC, C, logB	4	4.11381	2.57186	-0.130107	4.77202
Particle_size_nm	Descriptor_Ridge	B2, logC, C, C2	4	4.3421	2.74175	-0.259014	5.03683
Particle_size_nm	Descriptor_Ridge	B2, logC, C, AB	4	4.55325	2.97182	-0.384444	5.28178
Particle_size_nm	Descriptor_Ridge	B2, logC, C, AC	4	4.62727	2.98661	-0.429822	5.36764
Particle_size_nm	Descriptor_Ridge	B2, logC, logB, C2	4	4.19068	2.58732	-0.172738	4.86119
Particle_size_nm	Descriptor_Ridge	B2, logC, logB, AB	4	4.31307	2.74131	-0.242237	5.00316
Particle_size_nm	Descriptor_Ridge	B2, logC, logB, AC	4	4.40899	2.76862	-0.298107	5.11443
Particle_size_nm	Descriptor_Ridge	B2, logC, C2, AB	4	4.63951	2.99524	-0.437394	5.38183
Particle_size_nm	Descriptor_Ridge	B2, logC, C2, AC	4	4.71177	3.0082	-0.482516	5.46565
Particle_size_nm	Descriptor_Ridge	B2, logC, AB, AC	4	4.63134	3.04427	-0.432337	5.37236
Particle_size_nm	Descriptor_Ridge	B2, sqrtC, C, logB	4	4.0862	2.59702	-0.114988	4.73999
Particle_size_nm	Descriptor_Ridge	B2, sqrtC, C, C2	4	4.30163	2.7599	-0.235654	4.98989
Particle_size_nm	Descriptor_Ridge	B2, sqrtC, C, AB	4	4.53263	2.99876	-0.37193	5.25785
Particle_size_nm	Descriptor_Ridge	B2, sqrtC, C, AC	4	4.60494	3.012	-0.416051	5.34173
Particle_size_nm	Descriptor_Ridge	B2, sqrtC, logB, C2	4	4.1497	2.61433	-0.149913	4.81365
Particle_size_nm	Descriptor_Ridge	B2, sqrtC, logB, AB	4	4.3273	2.79252	-0.250445	5.01966
Particle_size_nm	Descriptor_Ridge	B2, sqrtC, logB, AC	4	4.41809	2.816	-0.303471	5.12499
Particle_size_nm	Descriptor_Ridge	B2, sqrtC, C2, AB	4	4.60598	3.02365	-0.416692	5.34293
Particle_size_nm	Descriptor_Ridge	B2, sqrtC, C2, AC	4	4.67701	3.03481	-0.460726	5.42534
Particle_size_nm	Descriptor_Ridge	B2, sqrtC, AB, AC	4	4.63437	3.1012	-0.434211	5.37587
Particle_size_nm	Descriptor_Ridge	B2, C, logB, C2	4	4.11475	2.65583	-0.130626	4.77311
Particle_size_nm	Descriptor_Ridge	B2, C, logB, AB	4	4.34436	2.8523	-0.260326	5.03946
Particle_size_nm	Descriptor_Ridge	B2, C, logB, AC	4	4.43127	2.87189	-0.311258	5.14027
Particle_size_nm	Descriptor_Ridge	B2, C, C2, AB	4	4.57937	3.05584	-0.400372	5.31207
Particle_size_nm	Descriptor_Ridge	B2, C, C2, AC	4	4.64912	3.06468	-0.443352	5.39297
Particle_size_nm	Descriptor_Ridge	B2, C, AB, AC	4	4.64666	3.16008	-0.44183	5.39013
Particle_size_nm	Descriptor_Ridge	B2, logB, C2, AB	4	4.38349	2.97113	-0.283135	5.08485
Particle_size_nm	Descriptor_Ridge	B2, logB, C2, AC	4	4.46679	2.97738	-0.332362	5.18147
Particle_size_nm	Descriptor_Ridge	B2, logB, AB, AC	4	4.51807	2.91851	-0.363132	5.24096
Particle_size_nm	Descriptor_Ridge	B2, C2, AB, AC	4	4.69081	3.25556	-0.469358	5.44134
Particle_size_nm	Descriptor_Ridge	B, logC, sqrtC, C	4	4.3795	2.81426	-0.280798	5.08022
Particle_size_nm	Descriptor_Ridge	B, logC, sqrtC, logB	4	4.31602	2.76216	-0.243939	5.00659
Particle_size_nm	Descriptor_Ridge	B, logC, sqrtC, C2	4	4.47036	2.82721	-0.334491	5.18561
Particle_size_nm	Descriptor_Ridge	B, logC, sqrtC, AB	4	4.6378	3.04932	-0.436337	5.37985
Particle_size_nm	Descriptor_Ridge	B, logC, sqrtC, AC	4	4.72307	3.07159	-0.489633	5.47876
Particle_size_nm	Descriptor_Ridge	B, logC, C, logB	4	4.34602	2.78137	-0.261288	5.04138
Particle_size_nm	Descriptor_Ridge	B, logC, C, C2	4	4.46242	2.83748	-0.329755	5.1764
Particle_size_nm	Descriptor_Ridge	B, logC, C, AB	4	4.67425	3.0722	-0.458998	5.42213
Particle_size_nm	Descriptor_Ridge	B, logC, C, AC	4	4.75776	3.09343	-0.511597	5.519
Particle_size_nm	Descriptor_Ridge	B, logC, logB, C2	4	4.42864	2.80297	-0.309703	5.13723
Particle_size_nm	Descriptor_Ridge	B, logC, logB, AB	4	4.56509	2.97592	-0.39165	5.2955
Particle_size_nm	Descriptor_Ridge	B, logC, logB, AC	4	4.66275	3.00554	-0.451829	5.40879
Particle_size_nm	Descriptor_Ridge	B, logC, C2, AB	4	4.76363	3.09868	-0.515331	5.52581
Particle_size_nm	Descriptor_Ridge	B, logC, C2, AC	4	4.84603	3.11856	-0.568207	5.62139
Particle_size_nm	Descriptor_Ridge	B, logC, AB, AC	4	4.70679	3.11077	-0.479383	5.45987
Particle_size_nm	Descriptor_Ridge	B, sqrtC, C, logB	4	4.31529	2.80373	-0.243516	5.00574
Particle_size_nm	Descriptor_Ridge	B, sqrtC, C, C2	4	4.42005	2.85447	-0.304627	5.12726
Particle_size_nm	Descriptor_Ridge	B, sqrtC, C, AB	4	4.6524	3.09795	-0.445394	5.39679
Particle_size_nm	Descriptor_Ridge	B, sqrtC, C, AC	4	4.73395	3.1178	-0.496507	5.49138
Particle_size_nm	Descriptor_Ridge	B, sqrtC, logB, C2	4	4.38387	2.82617	-0.283354	5.08529
Particle_size_nm	Descriptor_Ridge	B, sqrtC, logB, AB	4	4.5787	3.02577	-0.399962	5.31129
Particle_size_nm	Descriptor_Ridge	B, sqrtC, logB, AC	4	4.67165	3.05207	-0.457378	5.41911
Particle_size_nm	Descriptor_Ridge	B, sqrtC, C2, AB	4	4.7285	3.12539	-0.493062	5.48506
Particle_size_nm	Descriptor_Ridge	B, sqrtC, C2, AC	4	4.80932	3.14364	-0.544538	5.57881
Particle_size_nm	Descriptor_Ridge	B, sqrtC, AB, AC	4	4.7136	3.17852	-0.483669	5.46778
Particle_size_nm	Descriptor_Ridge	B, C, logB, C2	4	4.34469	2.8527	-0.260517	5.03984
Particle_size_nm	Descriptor_Ridge	B, C, logB, AB	4	4.59496	3.07395	-0.409922	5.33015
Particle_size_nm	Descriptor_Ridge	B, C, logB, AC	4	4.68447	3.09696	-0.46539	5.43399
Particle_size_nm	Descriptor_Ridge	B, C, C2, AB	4	4.70019	3.15597	-0.475241	5.45222
Particle_size_nm	Descriptor_Ridge	B, C, C2, AC	4	4.77939	3.17212	-0.525373	5.54409
Particle_size_nm	Descriptor_Ridge	B, C, AB, AC	4	4.73174	3.24623	-0.495109	5.48882
Particle_size_nm	Descriptor_Ridge	B, logB, C2, AB	4	4.63219	3.15785	-0.432864	5.37335
Particle_size_nm	Descriptor_Ridge	B, logB, C2, AC	4	4.71879	3.17271	-0.486939	5.4738
Particle_size_nm	Descriptor_Ridge	B, logB, AB, AC	4	4.7656	3.16802	-0.516585	5.5281
Particle_size_nm	Descriptor_Ridge	B, C2, AB, AC	4	4.79132	3.36103	-0.533001	5.55794
Particle_size_nm	Descriptor_Ridge	logC, sqrtC, C, logB	4	4.48072	2.90138	-0.340689	5.19764
Particle_size_nm	Descriptor_Ridge	logC, sqrtC, C, C2	4	4.45755	3.17896	-0.326859	5.17076
Particle_size_nm	Descriptor_Ridge	logC, sqrtC, C, AB	4	4.54667	3.16973	-0.380442	5.27414
Particle_size_nm	Descriptor_Ridge	logC, sqrtC, C, AC	4	4.79191	3.42852	-0.533377	5.55862
Particle_size_nm	Descriptor_Ridge	logC, sqrtC, logB, C2	4	4.57418	2.93013	-0.397199	5.30605
Particle_size_nm	Descriptor_Ridge	logC, sqrtC, logB, AB	4	4.73477	3.12487	-0.497023	5.49233
Particle_size_nm	Descriptor_Ridge	logC, sqrtC, logB, AC	4	4.83495	3.16682	-0.561045	5.60854
Particle_size_nm	Descriptor_Ridge	logC, sqrtC, C2, AB	4	4.63491	3.20803	-0.434547	5.3765
Particle_size_nm	Descriptor_Ridge	logC, sqrtC, C2, AC	4	4.87926	3.48395	-0.589791	5.65995
Particle_size_nm	Descriptor_Ridge	logC, sqrtC, AB, AC	4	4.37605	2.9611	-0.27878	5.07622
Particle_size_nm	Descriptor_Ridge	logC, C, logB, C2	4	4.56601	2.93194	-0.392213	5.29657
Particle_size_nm	Descriptor_Ridge	logC, C, logB, AB	4	4.77228	3.14608	-0.520836	5.53584
Particle_size_nm	Descriptor_Ridge	logC, C, logB, AC	4	4.87095	3.18774	-0.584382	5.65031
Particle_size_nm	Descriptor_Ridge	logC, C, C2, AB	4	4.63669	3.21045	-0.435645	5.37856
Particle_size_nm	Descriptor_Ridge	logC, C, C2, AC	4	4.88034	3.48222	-0.590493	5.66119
Particle_size_nm	Descriptor_Ridge	logC, C, AB, AC	4	4.4205	3.00051	-0.304893	5.12778
Particle_size_nm	Descriptor_Ridge	logC, logB, C2, AB	4	4.86416	3.18015	-0.579962	5.64242
Particle_size_nm	Descriptor_Ridge	logC, logB, C2, AC	4	4.96238	3.22201	-0.644415	5.75636
Particle_size_nm	Descriptor_Ridge	logC, logB, AB, AC	4	4.73274	3.1293	-0.495745	5.48998
Particle_size_nm	Descriptor_Ridge	logC, C2, AB, AC	4	4.51819	3.06136	-0.363203	5.2411
Particle_size_nm	Descriptor_Ridge	sqrtC, C, logB, C2	4	4.52239	2.93016	-0.365737	5.24597
Particle_size_nm	Descriptor_Ridge	sqrtC, C, logB, AB	4	4.74967	3.16593	-0.506463	5.50962
Particle_size_nm	Descriptor_Ridge	sqrtC, C, logB, AC	4	4.84614	3.19842	-0.568277	5.62152
Particle_size_nm	Descriptor_Ridge	sqrtC, C, C2, AB	4	4.61542	3.20339	-0.422506	5.35389
Particle_size_nm	Descriptor_Ridge	sqrtC, C, C2, AC	4	4.85768	3.46172	-0.575758	5.63491
Particle_size_nm	Descriptor_Ridge	sqrtC, C, AB, AC	4	4.41654	3.02423	-0.302557	5.12319
Particle_size_nm	Descriptor_Ridge	sqrtC, logB, C2, AB	4	4.82796	3.19519	-0.556537	5.60044
Particle_size_nm	Descriptor_Ridge	sqrtC, logB, C2, AC	4	4.92426	3.22672	-0.619252	5.71215
Particle_size_nm	Descriptor_Ridge	sqrtC, logB, AB, AC	4	4.74397	3.20534	-0.502846	5.503
Particle_size_nm	Descriptor_Ridge	sqrtC, C2, AB, AC	4	4.50666	3.08192	-0.356257	5.22773
Particle_size_nm	Descriptor_Ridge	C, logB, C2, AB	4	4.79856	3.22479	-0.537635	5.56633
Particle_size_nm	Descriptor_Ridge	C, logB, C2, AC	4	4.89289	3.25432	-0.598686	5.67576
Particle_size_nm	Descriptor_Ridge	C, logB, AB, AC	4	4.76891	3.28284	-0.518694	5.53194
Particle_size_nm	Descriptor_Ridge	C, C2, AB, AC	4	4.50843	3.12685	-0.357322	5.22978
Particle_size_nm	Descriptor_Ridge	logB, C2, AB, AC	4	4.84662	3.41885	-0.568589	5.62208
Particle_size_nm	Descriptor_ElasticNet	BC, B2	2	4.12048	2.69613	-0.133778	4.45012
Particle_size_nm	Descriptor_ElasticNet	BC, B	2	4.16377	2.73775	-0.157725	4.49687
Particle_size_nm	Descriptor_ElasticNet	BC, logC	2	4.15352	2.75404	-0.152033	4.4858
Particle_size_nm	Descriptor_ElasticNet	BC, sqrtC	2	4.12058	2.74406	-0.133832	4.45023
Particle_size_nm	Descriptor_ElasticNet	BC, C	2	4.09258	2.73962	-0.118473	4.41998
Particle_size_nm	Descriptor_ElasticNet	BC, logB	2	4.18536	2.80813	-0.169763	4.52019
Particle_size_nm	Descriptor_ElasticNet	BC, C2	2	4.05973	2.71953	-0.100593	4.38451
Particle_size_nm	Descriptor_ElasticNet	BC, AB	2	4.19349	2.83481	-0.174308	4.52897
Particle_size_nm	Descriptor_ElasticNet	BC, AC	2	4.54374	2.98649	-0.378663	4.90724
Particle_size_nm	Descriptor_ElasticNet	B2, B	2	3.67446	2.39766	0.0983917	3.96841
Particle_size_nm	Descriptor_ElasticNet	B2, logC	2	4.25282	2.69367	-0.207775	4.59305
Particle_size_nm	Descriptor_ElasticNet	B2, sqrtC	2	4.2496	2.73692	-0.205947	4.58957
Particle_size_nm	Descriptor_ElasticNet	B2, C	2	4.24937	2.77871	-0.205818	4.58932
Particle_size_nm	Descriptor_ElasticNet	B2, logB	2	3.55665	2.49241	0.155278	3.84118
Particle_size_nm	Descriptor_ElasticNet	B2, C2	2	4.25778	2.85146	-0.210594	4.59841
Particle_size_nm	Descriptor_ElasticNet	B2, AB	2	4.26145	2.97795	-0.212681	4.60237
Particle_size_nm	Descriptor_ElasticNet	B2, AC	2	4.52644	3.04343	-0.368185	4.88855
Particle_size_nm	Descriptor_ElasticNet	B, logC	2	4.37165	2.7902	-0.27621	4.72138
Particle_size_nm	Descriptor_ElasticNet	B, sqrtC	2	4.36789	2.83378	-0.274018	4.71732
Particle_size_nm	Descriptor_ElasticNet	B, C	2	4.36697	2.87589	-0.273481	4.71633
Particle_size_nm	Descriptor_ElasticNet	B, logB	2	3.68838	2.3594	0.0915439	3.98346
Particle_size_nm	Descriptor_ElasticNet	B, C2	2	4.37368	2.94918	-0.277399	4.72358
Particle_size_nm	Descriptor_ElasticNet	B, AB	2	4.35287	3.05648	-0.265268	4.7011
Particle_size_nm	Descriptor_ElasticNet	B, AC	2	4.62919	3.11036	-0.431004	4.99952
Particle_size_nm	Descriptor_ElasticNet	logC, sqrtC	2	4.41353	3.16038	-0.30078	4.76661
Particle_size_nm	Descriptor_ElasticNet	logC, C	2	4.53248	3.23603	-0.371841	4.89508
Particle_size_nm	Descriptor_ElasticNet	logC, logB	2	4.47355	2.88012	-0.336401	4.83144
Particle_size_nm	Descriptor_ElasticNet	logC, C2	2	4.62465	3.31867	-0.428198	4.99462
Particle_size_nm	Descriptor_ElasticNet	logC, AB	2	4.50634	3.15255	-0.356062	4.86685
Particle_size_nm	Descriptor_ElasticNet	logC, AC	2	4.764	3.4195	-0.515565	5.14512
Particle_size_nm	Descriptor_ElasticNet	sqrtC, C	2	4.43281	3.16974	-0.312169	4.78743
Particle_size_nm	Descriptor_ElasticNet	sqrtC, logB	2	4.4698	2.90761	-0.334162	4.82739
Particle_size_nm	Descriptor_ElasticNet	sqrtC, C2	2	4.5957	3.28494	-0.410375	4.96335
Particle_size_nm	Descriptor_ElasticNet	sqrtC, AB	2	4.54108	3.17579	-0.377049	4.90436
Particle_size_nm	Descriptor_ElasticNet	sqrtC, AC	2	4.79387	3.43203	-0.534629	5.17738
Particle_size_nm	Descriptor_ElasticNet	C, logB	2	4.46874	2.95026	-0.333524	4.82623
Particle_size_nm	Descriptor_ElasticNet	C, C2	2	4.54846	3.23613	-0.381533	4.91234
Particle_size_nm	Descriptor_ElasticNet	C, AB	2	4.57817	3.19633	-0.399637	4.94442
Particle_size_nm	Descriptor_ElasticNet	C, AC	2	4.82706	3.44225	-0.555956	5.21323
Particle_size_nm	Descriptor_ElasticNet	logB, C2	2	4.47473	3.02448	-0.337107	4.83271
Particle_size_nm	Descriptor_ElasticNet	logB, AB	2	4.42741	3.09811	-0.308977	4.78161
Particle_size_nm	Descriptor_ElasticNet	logB, AC	2	4.71836	3.14464	-0.48667	5.09583
Particle_size_nm	Descriptor_ElasticNet	C2, AB	2	4.65263	3.22605	-0.445535	5.02484
Particle_size_nm	Descriptor_ElasticNet	C2, AC	2	4.89643	3.45423	-0.600997	5.28814
Particle_size_nm	Descriptor_ElasticNet	AB, AC	2	4.73548	3.18267	-0.497473	5.11431
Particle_size_nm	Descriptor_ElasticNet	BC, B2, B	3	3.63251	2.3867	0.118859	4.06841
Particle_size_nm	Descriptor_ElasticNet	BC, B2, logC	3	4.75482	3.04358	-0.509733	5.3254
Particle_size_nm	Descriptor_ElasticNet	BC, B2, sqrtC	3	4.53333	2.97059	-0.372357	5.07734
Particle_size_nm	Descriptor_ElasticNet	BC, B2, C	3	4.32608	2.96396	-0.249741	4.84521
Particle_size_nm	Descriptor_ElasticNet	BC, B2, logB	3	3.41652	2.57474	0.220532	3.8265
Particle_size_nm	Descriptor_ElasticNet	BC, B2, C2	3	4.16626	2.9716	-0.159111	4.66622
Particle_size_nm	Descriptor_ElasticNet	BC, B2, AB	3	4.47722	2.98634	-0.338595	5.01449
Particle_size_nm	Descriptor_ElasticNet	BC, B2, AC	3	4.58024	3.00844	-0.400901	5.12986
Particle_size_nm	Descriptor_ElasticNet	BC, B, logC	3	4.67035	3.14869	-0.456564	5.23079
Particle_size_nm	Descriptor_ElasticNet	BC, B, sqrtC	3	4.41842	3.09529	-0.303663	4.94863
Particle_size_nm	Descriptor_ElasticNet	BC, B, C	3	4.17141	3.01831	-0.161978	4.67198
Particle_size_nm	Descriptor_ElasticNet	BC, B, logB	3	3.63945	2.37817	0.115487	4.07619
Particle_size_nm	Descriptor_ElasticNet	BC, B, C2	3	4.12259	2.98009	-0.13494	4.61731
Particle_size_nm	Descriptor_ElasticNet	BC, B, AB	3	4.51739	3.02393	-0.36272	5.05948
Particle_size_nm	Descriptor_ElasticNet	BC, B, AC	3	4.63915	3.05772	-0.437172	5.19585
Particle_size_nm	Descriptor_ElasticNet	BC, logC, sqrtC	3	4.2157	2.79251	-0.186783	4.72159
Particle_size_nm	Descriptor_ElasticNet	BC, logC, C	3	4.32712	2.83999	-0.250344	4.84637
Particle_size_nm	Descriptor_ElasticNet	BC, logC, logB	3	4.26923	2.99915	-0.217112	4.78154
Particle_size_nm	Descriptor_ElasticNet	BC, logC, C2	3	4.4328	2.91018	-0.312166	4.96474
Particle_size_nm	Descriptor_ElasticNet	BC, logC, AB	3	4.54017	3.04273	-0.376498	5.08499
Particle_size_nm	Descriptor_ElasticNet	BC, logC, AC	3	4.62431	3.07317	-0.427994	5.17923
Particle_size_nm	Descriptor_ElasticNet	BC, sqrtC, C	3	4.19678	2.78527	-0.176155	4.7004
Particle_size_nm	Descriptor_ElasticNet	BC, sqrtC, logB	3	3.87829	2.78063	-0.00441393	4.34369
Particle_size_nm	Descriptor_ElasticNet	BC, sqrtC, C2	3	4.39085	2.8832	-0.287444	4.91775
Particle_size_nm	Descriptor_ElasticNet	BC, sqrtC, AB	3	4.50655	3.04033	-0.356189	5.04734
Particle_size_nm	Descriptor_ElasticNet	BC, sqrtC, AC	3	4.57975	3.05811	-0.400605	5.12932
Particle_size_nm	Descriptor_ElasticNet	BC, C, logB	3	3.59184	2.52475	0.138481	4.02286
Particle_size_nm	Descriptor_ElasticNet	BC, C, C2	3	4.30896	2.83144	-0.239873	4.82604
Particle_size_nm	Descriptor_ElasticNet	BC, C, AB	3	4.46991	3.03064	-0.334226	5.0063
Particle_size_nm	Descriptor_ElasticNet	BC, C, AC	3	4.54009	3.04604	-0.376451	5.0849
Particle_size_nm	Descriptor_ElasticNet	BC, logB, C2	3	3.71904	2.59051	0.0763784	4.16533
Particle_size_nm	Descriptor_ElasticNet	BC, logB, AB	3	4.51832	3.07914	-0.363279	5.06051
Particle_size_nm	Descriptor_ElasticNet	BC, logB, AC	3	4.67212	3.12823	-0.45767	5.23277
Particle_size_nm	Descriptor_ElasticNet	BC, C2, AB	3	4.40839	2.9964	-0.29775	4.93739
Particle_size_nm	Descriptor_ElasticNet	BC, C2, AC	3	4.48844	3.00824	-0.345311	5.02705
Particle_size_nm	Descriptor_ElasticNet	BC, AB, AC	3	4.47652	3.11915	-0.338171	5.0137
Particle_size_nm	Descriptor_ElasticNet	B2, B, logC	3	3.87113	2.47786	-0.000705946	4.33566
Particle_size_nm	Descriptor_ElasticNet	B2, B, sqrtC	3	3.87024	2.50822	-0.00024746	4.33467
Particle_size_nm	Descriptor_ElasticNet	B2, B, C	3	3.87256	2.55686	-0.00144479	4.33726
Particle_size_nm	Descriptor_ElasticNet	B2, B, logB	3	3.55659	2.49267	0.155305	3.98338
Particle_size_nm	Descriptor_ElasticNet	B2, B, C2	3	3.88599	2.66485	-0.00840254	4.3523
Particle_size_nm	Descriptor_ElasticNet	B2, B, AB	3	3.89358	2.60919	-0.01235	4.36081
Particle_size_nm	Descriptor_ElasticNet	B2, B, AC	3	4.14558	2.76461	-0.147631	4.64305
Particle_size_nm	Descriptor_ElasticNet	B2, logC, sqrtC	3	4.34643	2.72881	-0.261527	4.868
Particle_size_nm	Descriptor_ElasticNet	B2, logC, C	3	4.47563	2.75013	-0.337645	5.01271
Particle_size_nm	Descriptor_ElasticNet	B2, logC, logB	3	3.6978	2.70317	0.0869008	4.14153
Particle_size_nm	Descriptor_ElasticNet	B2, logC, C2	3	4.58501	2.77728	-0.403823	5.13521
Particle_size_nm	Descriptor_ElasticNet	B2, logC, AB	3	4.56018	2.95731	-0.38866	5.1074
Particle_size_nm	Descriptor_ElasticNet	B2, logC, AC	3	4.63487	2.97192	-0.434519	5.19105
Particle_size_nm	Descriptor_ElasticNet	B2, sqrtC, C	3	4.34493	2.76033	-0.26066	4.86633
Particle_size_nm	Descriptor_ElasticNet	B2, sqrtC, logB	3	3.69898	2.72134	0.0863175	4.14286
Particle_size_nm	Descriptor_ElasticNet	B2, sqrtC, C2	3	4.5442	2.77358	-0.378943	5.0895
Particle_size_nm	Descriptor_ElasticNet	B2, sqrtC, AB	3	4.5733	3.00994	-0.396659	5.12209
Particle_size_nm	Descriptor_ElasticNet	B2, sqrtC, AC	3	4.64285	3.02177	-0.439464	5.19999
Particle_size_nm	Descriptor_ElasticNet	B2, C, logB	3	3.70355	2.73638	0.0840597	4.14797
Particle_size_nm	Descriptor_ElasticNet	B2, C, C2	3	4.47169	2.78456	-0.335289	5.0083
Particle_size_nm	Descriptor_ElasticNet	B2, C, AB	3	4.58934	3.06089	-0.406473	5.14006
Particle_size_nm	Descriptor_ElasticNet	B2, C, AC	3	4.65546	3.07072	-0.447296	5.21412
Particle_size_nm	Descriptor_ElasticNet	B2, logB, C2	3	3.72133	2.75476	0.0752414	4.16789
Particle_size_nm	Descriptor_ElasticNet	B2, logB, AB	3	3.74746	2.60221	0.0622098	4.19716
Particle_size_nm	Descriptor_ElasticNet	B2, logB, AC	3	3.96557	2.85355	-0.0501297	4.44144
Particle_size_nm	Descriptor_ElasticNet	B2, C2, AB	3	4.62684	3.14983	-0.429553	5.18206
Particle_size_nm	Descriptor_ElasticNet	B2, C2, AC	3	4.68936	3.15099	-0.468447	5.25208
Particle_size_nm	Descriptor_ElasticNet	B2, AB, AC	3	4.78531	3.11736	-0.529156	5.35955
Particle_size_nm	Descriptor_ElasticNet	B, logC, sqrtC	3	4.46908	2.82836	-0.33373	5.00537
Particle_size_nm	Descriptor_ElasticNet	B, logC, C	3	4.60356	2.84257	-0.415205	5.15599
Particle_size_nm	Descriptor_ElasticNet	B, logC, logB	3	3.90737	2.47441	-0.0195299	4.37625
Particle_size_nm	Descriptor_ElasticNet	B, logC, C2	3	4.71611	2.89514	-0.485252	5.28205
Particle_size_nm	Descriptor_ElasticNet	B, logC, AB	3	4.68503	3.06498	-0.46574	5.24724
Particle_size_nm	Descriptor_ElasticNet	B, logC, AC	3	4.76817	3.08485	-0.518221	5.34035
Particle_size_nm	Descriptor_ElasticNet	B, sqrtC, C	3	4.46772	2.86096	-0.33292	5.00385
Particle_size_nm	Descriptor_ElasticNet	B, sqrtC, logB	3	3.90692	2.498	-0.0192952	4.37575
Particle_size_nm	Descriptor_ElasticNet	B, sqrtC, C2	3	4.6732	2.88105	-0.458344	5.23398
Particle_size_nm	Descriptor_ElasticNet	B, sqrtC, AB	3	4.69836	3.11747	-0.474092	5.26217
Particle_size_nm	Descriptor_ElasticNet	B, sqrtC, AC	3	4.77644	3.13532	-0.52349	5.34961
Particle_size_nm	Descriptor_ElasticNet	B, C, logB	3	3.90959	2.54852	-0.020691	4.37874
Particle_size_nm	Descriptor_ElasticNet	B, C, C2	3	4.59747	2.87631	-0.411463	5.14917
Particle_size_nm	Descriptor_ElasticNet	B, C, AB	3	4.71449	3.16828	-0.484227	5.28023
Particle_size_nm	Descriptor_ElasticNet	B, C, AC	3	4.789	3.18433	-0.531512	5.36368
Particle_size_nm	Descriptor_ElasticNet	B, logB, C2	3	3.92346	2.65829	-0.0279457	4.39428
Particle_size_nm	Descriptor_ElasticNet	B, logB, AB	3	3.91587	2.63288	-0.0239722	4.38577
Particle_size_nm	Descriptor_ElasticNet	B, logB, AC	3	4.17526	2.78949	-0.164122	4.67629
Particle_size_nm	Descriptor_ElasticNet	B, C2, AB	3	4.75183	3.25694	-0.507831	5.32205
Particle_size_nm	Descriptor_ElasticNet	B, C2, AC	3	4.82258	3.26523	-0.553067	5.40129
Particle_size_nm	Descriptor_ElasticNet	B, AB, AC	3	4.9487	3.28388	-0.635362	5.54254
Particle_size_nm	Descriptor_ElasticNet	logC, sqrtC, C	3	4.5331	3.23641	-0.372215	5.07707
Particle_size_nm	Descriptor_ElasticNet	logC, sqrtC, logB	3	4.57379	2.9289	-0.396962	5.12265
Particle_size_nm	Descriptor_ElasticNet	logC, sqrtC, C2	3	4.62718	3.32223	-0.429764	5.18244
Particle_size_nm	Descriptor_ElasticNet	logC, sqrtC, AB	3	4.60844	3.20894	-0.418203	5.16145
Particle_size_nm	Descriptor_ElasticNet	logC, sqrtC, AC	3	4.85945	3.48241	-0.576908	5.44259
Particle_size_nm	Descriptor_ElasticNet	logC, C, logB	3	4.71255	2.99518	-0.483009	5.27806
Particle_size_nm	Descriptor_ElasticNet	logC, C, C2	3	4.62529	3.3195	-0.428597	5.18033
Particle_size_nm	Descriptor_ElasticNet	logC, C, AB	3	4.73106	3.26432	-0.494681	5.29879
Particle_size_nm	Descriptor_ElasticNet	logC, C, AC	3	4.98532	3.56999	-0.659655	5.58356
Particle_size_nm	Descriptor_ElasticNet	logC, logB, C2	3	4.82736	3.04383	-0.55615	5.40665
Particle_size_nm	Descriptor_ElasticNet	logC, logB, AB	3	4.78558	3.14905	-0.529326	5.35984
Particle_size_nm	Descriptor_ElasticNet	logC, logB, AC	3	4.88342	3.18613	-0.592501	5.46943
Particle_size_nm	Descriptor_ElasticNet	logC, C2, AB	3	4.82511	3.32685	-0.5547	5.40413
Particle_size_nm	Descriptor_ElasticNet	logC, C2, AC	3	5.07976	3.66014	-0.723126	5.68933
Particle_size_nm	Descriptor_ElasticNet	logC, AB, AC	3	4.44001	2.97967	-0.316434	4.97281
Particle_size_nm	Descriptor_ElasticNet	sqrtC, C, logB	3	4.57314	2.94565	-0.396563	5.12192
Particle_size_nm	Descriptor_ElasticNet	sqrtC, C, C2	3	4.60032	3.28938	-0.413211	5.15236
Particle_size_nm	Descriptor_ElasticNet	sqrtC, C, AB	3	4.63713	3.22737	-0.43592	5.19359
Particle_size_nm	Descriptor_ElasticNet	sqrtC, C, AC	3	4.88895	3.49852	-0.596111	5.47563
Particle_size_nm	Descriptor_ElasticNet	sqrtC, logB, C2	3	4.78362	3.02593	-0.528074	5.35765
Particle_size_nm	Descriptor_ElasticNet	sqrtC, logB, AB	3	4.79937	3.19035	-0.538153	5.37529
Particle_size_nm	Descriptor_ElasticNet	sqrtC, logB, AC	3	4.89214	3.22174	-0.598193	5.4792
Particle_size_nm	Descriptor_ElasticNet	sqrtC, C2, AB	3	4.80016	3.30479	-0.53866	5.37618
Particle_size_nm	Descriptor_ElasticNet	sqrtC, C2, AC	3	5.05337	3.626	-0.705273	5.65978
Particle_size_nm	Descriptor_ElasticNet	sqrtC, AB, AC	3	4.4781	3.0728	-0.339117	5.01547
Particle_size_nm	Descriptor_ElasticNet	C, logB, C2	3	4.70473	2.99277	-0.478089	5.2693
Particle_size_nm	Descriptor_ElasticNet	C, logB, AB	3	4.81583	3.24124	-0.548721	5.39373
Particle_size_nm	Descriptor_ElasticNet	C, logB, AC	3	4.90489	3.27085	-0.606533	5.49347
Particle_size_nm	Descriptor_ElasticNet	C, C2, AB	3	4.75593	3.27502	-0.510437	5.32664
Particle_size_nm	Descriptor_ElasticNet	C, C2, AC	3	5.00514	3.57119	-0.672874	5.60575
Particle_size_nm	Descriptor_ElasticNet	C, AB, AC	3	4.53182	3.19874	-0.371441	5.07564
Particle_size_nm	Descriptor_ElasticNet	logB, C2, AB	3	4.85351	3.32998	-0.573051	5.43593
Particle_size_nm	Descriptor_ElasticNet	logB, C2, AC	3	4.93883	3.35297	-0.628846	5.53149
Particle_size_nm	Descriptor_ElasticNet	logB, AB, AC	3	5.07296	3.38583	-0.718517	5.68171
Particle_size_nm	Descriptor_ElasticNet	C2, AB, AC	3	4.66616	3.41044	-0.453954	5.2261
Particle_size_nm	Descriptor_ElasticNet	BC, B2, B, logC	4	4.1161	2.65766	-0.131369	4.77468
Particle_size_nm	Descriptor_ElasticNet	BC, B2, B, sqrtC	4	3.83843	2.42548	0.0161288	4.45258
Particle_size_nm	Descriptor_ElasticNet	BC, B2, B, C	4	3.51977	2.28325	0.172705	4.08293
Particle_size_nm	Descriptor_ElasticNet	BC, B2, B, logB	4	3.41619	2.57502	0.22068	3.96278
Particle_size_nm	Descriptor_ElasticNet	BC, B2, B, C2	4	3.36382	2.2564	0.24439	3.90203
Particle_size_nm	Descriptor_ElasticNet	BC, B2, B, AB	4	3.92376	2.52176	-0.0281046	4.55157
Particle_size_nm	Descriptor_ElasticNet	BC, B2, B, AC	4	4.04317	2.62841	-0.0916315	4.69008
Particle_size_nm	Descriptor_ElasticNet	BC, B2, logC, sqrtC	4	4.73033	3.06768	-0.49422	5.48718
Particle_size_nm	Descriptor_ElasticNet	BC, B2, logC, C	4	4.75488	3.15862	-0.50977	5.51566
Particle_size_nm	Descriptor_ElasticNet	BC, B2, logC, logB	4	3.7269	2.69828	0.0724703	4.32321
Particle_size_nm	Descriptor_ElasticNet	BC, B2, logC, C2	4	4.84348	3.29558	-0.56656	5.61844
Particle_size_nm	Descriptor_ElasticNet	BC, B2, logC, AB	4	5.12914	3.36519	-0.756791	5.9498
Particle_size_nm	Descriptor_ElasticNet	BC, B2, logC, AC	4	5.21013	3.38354	-0.812709	6.04375
Particle_size_nm	Descriptor_ElasticNet	BC, B2, sqrtC, C	4	4.54988	3.06837	-0.382395	5.27787
Particle_size_nm	Descriptor_ElasticNet	BC, B2, sqrtC, logB	4	3.36236	2.39221	0.245047	3.90034
Particle_size_nm	Descriptor_ElasticNet	BC, B2, sqrtC, C2	4	4.77531	3.26889	-0.52277	5.53936
Particle_size_nm	Descriptor_ElasticNet	BC, B2, sqrtC, AB	4	4.91617	3.29286	-0.613932	5.70276
Particle_size_nm	Descriptor_ElasticNet	BC, B2, sqrtC, AC	4	4.98953	3.30397	-0.662457	5.78785
Particle_size_nm	Descriptor_ElasticNet	BC, B2, C, logB	4	2.99703	2.10035	0.40019	3.47655
Particle_size_nm	Descriptor_ElasticNet	BC, B2, C, C2	4	4.61393	3.20085	-0.421589	5.35216
Particle_size_nm	Descriptor_ElasticNet	BC, B2, C, AB	4	4.70454	3.27458	-0.477968	5.45726
Particle_size_nm	Descriptor_ElasticNet	BC, B2, C, AC	4	4.77231	3.28247	-0.52086	5.53588
Particle_size_nm	Descriptor_ElasticNet	BC, B2, logB, C2	4	2.88976	2.1502	0.442358	3.35212
Particle_size_nm	Descriptor_ElasticNet	BC, B2, logB, AB	4	3.66116	2.50842	0.104904	4.24695
Particle_size_nm	Descriptor_ElasticNet	BC, B2, logB, AC	4	3.78161	2.80687	0.0450383	4.38667
Particle_size_nm	Descriptor_ElasticNet	BC, B2, C2, AB	4	4.51653	3.25811	-0.3622	5.23917
Particle_size_nm	Descriptor_ElasticNet	BC, B2, C2, AC	4	4.58104	3.26285	-0.401392	5.31401
Particle_size_nm	Descriptor_ElasticNet	BC, B2, AB, AC	4	4.73969	3.4644	-0.500139	5.49804
Particle_size_nm	Descriptor_ElasticNet	BC, B, logC, sqrtC	4	4.61981	3.20438	-0.425213	5.35898
Particle_size_nm	Descriptor_ElasticNet	BC, B, logC, C	4	4.63583	3.25916	-0.435115	5.37756
Particle_size_nm	Descriptor_ElasticNet	BC, B, logC, logB	4	3.97619	2.62505	-0.0557597	4.61238
Particle_size_nm	Descriptor_ElasticNet	BC, B, logC, C2	4	4.75863	3.3524	-0.512153	5.52001
Particle_size_nm	Descriptor_ElasticNet	BC, B, logC, AB	4	5.06793	3.48472	-0.715115	5.8788
Particle_size_nm	Descriptor_ElasticNet	BC, B, logC, AC	4	5.16455	3.50687	-0.781133	5.99088
Particle_size_nm	Descriptor_ElasticNet	BC, B, sqrtC, C	4	4.40212	3.14753	-0.294062	5.10646
Particle_size_nm	Descriptor_ElasticNet	BC, B, sqrtC, logB	4	3.59477	2.36773	0.137073	4.16993
Particle_size_nm	Descriptor_ElasticNet	BC, B, sqrtC, C2	4	4.66778	3.30519	-0.454966	5.41463
Particle_size_nm	Descriptor_ElasticNet	BC, B, sqrtC, AB	4	4.8152	3.41916	-0.548315	5.58563
Particle_size_nm	Descriptor_ElasticNet	BC, B, sqrtC, AC	4	4.89529	3.43421	-0.600252	5.67854
Particle_size_nm	Descriptor_ElasticNet	BC, B, C, logB	4	3.2596	2.21149	0.290486	3.78114
Particle_size_nm	Descriptor_ElasticNet	BC, B, C, C2	4	4.50887	3.2187	-0.357586	5.23029
Particle_size_nm	Descriptor_ElasticNet	BC, B, C, AB	4	4.54377	3.3152	-0.378685	5.27078
Particle_size_nm	Descriptor_ElasticNet	BC, B, C, AC	4	4.6147	3.32765	-0.422062	5.35305
Particle_size_nm	Descriptor_ElasticNet	BC, B, logB, C2	4	3.25011	2.29127	0.294613	3.77013
Particle_size_nm	Descriptor_ElasticNet	BC, B, logB, AB	4	3.92451	2.53416	-0.0284973	4.55244
Particle_size_nm	Descriptor_ElasticNet	BC, B, logB, AC	4	4.05832	2.6392	-0.0998257	4.70765
Particle_size_nm	Descriptor_ElasticNet	BC, B, C2, AB	4	4.41442	3.21845	-0.301304	5.12073
Particle_size_nm	Descriptor_ElasticNet	BC, B, C2, AC	4	4.49642	3.24336	-0.350097	5.21584
Particle_size_nm	Descriptor_ElasticNet	BC, B, AB, AC	4	4.58233	3.37221	-0.402184	5.31551
Particle_size_nm	Descriptor_ElasticNet	BC, logC, sqrtC, C	4	4.32823	2.84031	-0.250984	5.02074
Particle_size_nm	Descriptor_ElasticNet	BC, logC, sqrtC, logB	4	4.02505	2.85023	-0.0818694	4.66906
Particle_size_nm	Descriptor_ElasticNet	BC, logC, sqrtC, C2	4	4.43697	2.91228	-0.314636	5.14689
Particle_size_nm	Descriptor_ElasticNet	BC, logC, sqrtC, AB	4	4.59449	3.07264	-0.40963	5.3296
Particle_size_nm	Descriptor_ElasticNet	BC, logC, sqrtC, AC	4	4.66671	3.105	-0.454295	5.41338
Particle_size_nm	Descriptor_ElasticNet	BC, logC, C, logB	4	3.95411	2.72032	-0.0440691	4.58677
Particle_size_nm	Descriptor_ElasticNet	BC, logC, C, C2	4	4.43319	2.91051	-0.312393	5.1425
Particle_size_nm	Descriptor_ElasticNet	BC, logC, C, AB	4	4.69141	3.11134	-0.469729	5.44203
Particle_size_nm	Descriptor_ElasticNet	BC, logC, C, AC	4	4.75867	3.1437	-0.512179	5.52006
Particle_size_nm	Descriptor_ElasticNet	BC, logC, logB, C2	4	4.0606	2.75122	-0.101061	4.71029
Particle_size_nm	Descriptor_ElasticNet	BC, logC, logB, AB	4	4.65654	3.30248	-0.447967	5.40159
Particle_size_nm	Descriptor_ElasticNet	BC, logC, logB, AC	4	4.78078	3.34375	-0.526262	5.5457
Particle_size_nm	Descriptor_ElasticNet	BC, logC, C2, AB	4	4.78706	3.17411	-0.530275	5.55299
Particle_size_nm	Descriptor_ElasticNet	BC, logC, C2, AC	4	4.85241	3.20719	-0.572339	5.62879
Particle_size_nm	Descriptor_ElasticNet	BC, logC, AB, AC	4	5.15606	3.46281	-0.775283	5.98103
Particle_size_nm	Descriptor_ElasticNet	BC, sqrtC, C, logB	4	3.74127	2.61747	0.0653074	4.33987
Particle_size_nm	Descriptor_ElasticNet	BC, sqrtC, C, C2	4	4.39323	2.88442	-0.288843	5.09615
Particle_size_nm	Descriptor_ElasticNet	BC, sqrtC, C, AB	4	4.57158	3.06345	-0.395612	5.30304
Particle_size_nm	Descriptor_ElasticNet	BC, sqrtC, C, AC	4	4.63964	3.09312	-0.437475	5.38198
Particle_size_nm	Descriptor_ElasticNet	BC, sqrtC, logB, C2	4	3.98736	2.70762	-0.0617006	4.62534
Particle_size_nm	Descriptor_ElasticNet	BC, sqrtC, logB, AB	4	4.2513	3.05453	-0.206909	4.9315
Particle_size_nm	Descriptor_ElasticNet	BC, sqrtC, logB, AC	4	4.3614	3.09118	-0.270234	5.05923
Particle_size_nm	Descriptor_ElasticNet	BC, sqrtC, C2, AB	4	4.74569	3.14794	-0.503937	5.505
Particle_size_nm	Descriptor_ElasticNet	BC, sqrtC, C2, AC	4	4.81194	3.1809	-0.546224	5.58185
Particle_size_nm	Descriptor_ElasticNet	BC, sqrtC, AB, AC	4	5.06029	3.46568	-0.709943	5.86993
Particle_size_nm	Descriptor_ElasticNet	BC, C, logB, C2	4	3.86935	2.63916	0.000212879	4.48845
Particle_size_nm	Descriptor_ElasticNet	BC, C, logB, AB	4	3.91754	2.75561	-0.0248466	4.54435
Particle_size_nm	Descriptor_ElasticNet	BC, C, logB, AC	4	4.02163	2.79005	-0.0800284	4.66509
Particle_size_nm	Descriptor_ElasticNet	BC, C, C2, AB	4	4.6655	3.09737	-0.453543	5.41198
Particle_size_nm	Descriptor_ElasticNet	BC, C, C2, AC	4	4.73141	3.12852	-0.494902	5.48843
Particle_size_nm	Descriptor_ElasticNet	BC, C, AB, AC	4	4.92281	3.43788	-0.618294	5.71046
Particle_size_nm	Descriptor_ElasticNet	BC, logB, C2, AB	4	3.94801	2.66519	-0.0408503	4.57969
Particle_size_nm	Descriptor_ElasticNet	BC, logB, C2, AC	4	4.05417	2.76061	-0.0975806	4.70284
Particle_size_nm	Descriptor_ElasticNet	BC, logB, AB, AC	4	4.10338	3.07806	-0.124386	4.75992
Particle_size_nm	Descriptor_ElasticNet	BC, C2, AB, AC	4	4.66793	3.31185	-0.455057	5.4148
Particle_size_nm	Descriptor_ElasticNet	B2, B, logC, sqrtC	4	3.95319	2.51335	-0.0435841	4.5857
Particle_size_nm	Descriptor_ElasticNet	B2, B, logC, C	4	4.06911	2.53291	-0.105681	4.72016
Particle_size_nm	Descriptor_ElasticNet	B2, B, logC, logB	4	3.6978	2.7035	0.086898	4.28945
Particle_size_nm	Descriptor_ElasticNet	B2, B, logC, C2	4	4.17139	2.53955	-0.161966	4.83881
Particle_size_nm	Descriptor_ElasticNet	B2, B, logC, AB	4	4.11535	2.56356	-0.130952	4.7738
Particle_size_nm	Descriptor_ElasticNet	B2, B, logC, AC	4	4.20549	2.63925	-0.181038	4.87836
Particle_size_nm	Descriptor_ElasticNet	B2, B, sqrtC, C	4	3.95328	2.52881	-0.0436312	4.58581
Particle_size_nm	Descriptor_ElasticNet	B2, B, sqrtC, logB	4	3.699	2.72168	0.0863089	4.29084
Particle_size_nm	Descriptor_ElasticNet	B2, B, sqrtC, C2	4	4.14091	2.54712	-0.145045	4.80345
Particle_size_nm	Descriptor_ElasticNet	B2, B, sqrtC, AB	4	4.12957	2.63464	-0.138786	4.79031
Particle_size_nm	Descriptor_ElasticNet	B2, B, sqrtC, AC	4	4.21295	2.69045	-0.185237	4.88703
Particle_size_nm	Descriptor_ElasticNet	B2, B, C, logB	4	3.70357	2.73672	0.0840495	4.29614
Particle_size_nm	Descriptor_ElasticNet	B2, B, C, C2	4	4.07063	2.55165	-0.106507	4.72193
Particle_size_nm	Descriptor_ElasticNet	B2, B, C, AB	4	4.14711	2.71361	-0.148477	4.81065
Particle_size_nm	Descriptor_ElasticNet	B2, B, C, AC	4	4.22514	2.75023	-0.192103	4.90116
Particle_size_nm	Descriptor_ElasticNet	B2, B, logB, C2	4	3.72129	2.75506	0.0752627	4.3167
Particle_size_nm	Descriptor_ElasticNet	B2, B, logB, AB	4	3.74732	2.60239	0.062282	4.34689
Particle_size_nm	Descriptor_ElasticNet	B2, B, logB, AC	4	3.96552	2.8537	-0.0501004	4.6
Particle_size_nm	Descriptor_ElasticNet	B2, B, C2, AB	4	4.18809	2.86041	-0.171285	4.85818
Particle_size_nm	Descriptor_ElasticNet	B2, B, C2, AC	4	4.26086	2.86542	-0.212345	4.9426
Particle_size_nm	Descriptor_ElasticNet	B2, B, AB, AC	4	4.40214	2.89868	-0.294076	5.10649
Particle_size_nm	Descriptor_ElasticNet	B2, logC, sqrtC, C	4	4.4765	2.75057	-0.33816	5.19274
Particle_size_nm	Descriptor_ElasticNet	B2, logC, sqrtC, logB	4	3.77399	2.74115	0.0488842	4.37783
Particle_size_nm	Descriptor_ElasticNet	B2, logC, sqrtC, C2	4	4.58947	2.77863	-0.406554	5.32378
Particle_size_nm	Descriptor_ElasticNet	B2, logC, sqrtC, AB	4	4.66253	2.99977	-0.451694	5.40854
Particle_size_nm	Descriptor_ElasticNet	B2, logC, sqrtC, AC	4	4.73344	3.01148	-0.496188	5.4908
Particle_size_nm	Descriptor_ElasticNet	B2, logC, C, logB	4	3.8878	2.77069	-0.0093422	4.50984
Particle_size_nm	Descriptor_ElasticNet	B2, logC, C, C2	4	4.58529	2.77743	-0.403997	5.31894
Particle_size_nm	Descriptor_ElasticNet	B2, logC, C, AB	4	4.79239	3.02467	-0.533682	5.55917
Particle_size_nm	Descriptor_ElasticNet	B2, logC, C, AC	4	4.86293	3.03539	-0.579165	5.641
Particle_size_nm	Descriptor_ElasticNet	B2, logC, logB, C2	4	3.98349	2.78261	-0.059642	4.62085
Particle_size_nm	Descriptor_ElasticNet	B2, logC, logB, AB	4	3.90295	2.65911	-0.0172262	4.52742
Particle_size_nm	Descriptor_ElasticNet	B2, logC, logB, AC	4	3.99623	2.87958	-0.0664328	4.63563
Particle_size_nm	Descriptor_ElasticNet	B2, logC, C2, AB	4	4.89877	3.04373	-0.602527	5.68257
Particle_size_nm	Descriptor_ElasticNet	B2, logC, C2, AC	4	4.96827	3.05232	-0.64832	5.76319
Particle_size_nm	Descriptor_ElasticNet	B2, logC, AB, AC	4	4.90635	3.2893	-0.607492	5.69137
Particle_size_nm	Descriptor_ElasticNet	B2, sqrtC, C, logB	4	3.77891	2.75617	0.0464055	4.38353
Particle_size_nm	Descriptor_ElasticNet	B2, sqrtC, C, C2	4	4.55086	2.77577	-0.38299	5.279
Particle_size_nm	Descriptor_ElasticNet	B2, sqrtC, C, AB	4	4.67313	3.03813	-0.458303	5.42083
Particle_size_nm	Descriptor_ElasticNet	B2, sqrtC, C, AC	4	4.74205	3.05065	-0.501636	5.50078
Particle_size_nm	Descriptor_ElasticNet	B2, sqrtC, logB, C2	4	3.94753	2.78256	-0.0405975	4.57914
Particle_size_nm	Descriptor_ElasticNet	B2, sqrtC, logB, AB	4	3.91682	2.66393	-0.0244704	4.54351
Particle_size_nm	Descriptor_ElasticNet	B2, sqrtC, logB, AC	4	4.00247	2.88814	-0.069766	4.64287
Particle_size_nm	Descriptor_ElasticNet	B2, sqrtC, C2, AB	4	4.86217	3.04804	-0.578674	5.64012
Particle_size_nm	Descriptor_ElasticNet	B2, sqrtC, C2, AC	4	4.9311	3.05792	-0.623748	5.72007
Particle_size_nm	Descriptor_ElasticNet	B2, sqrtC, AB, AC	4	4.91871	3.37455	-0.615599	5.7057
Particle_size_nm	Descriptor_ElasticNet	B2, C, logB, C2	4	3.8807	2.78046	-0.00566053	4.50161
Particle_size_nm	Descriptor_ElasticNet	B2, C, logB, AB	4	3.93442	2.69003	-0.0336989	4.56393
Particle_size_nm	Descriptor_ElasticNet	B2, C, logB, AC	4	4.01344	2.89053	-0.0756381	4.6556
Particle_size_nm	Descriptor_ElasticNet	B2, C, C2, AB	4	4.79388	3.06221	-0.53464	5.56091
Particle_size_nm	Descriptor_ElasticNet	B2, C, C2, AC	4	4.86163	3.07029	-0.578321	5.63949
Particle_size_nm	Descriptor_ElasticNet	B2, C, AB, AC	4	4.94584	3.48044	-0.633475	5.73718
Particle_size_nm	Descriptor_ElasticNet	B2, logB, C2, AB	4	3.97637	2.78114	-0.0558553	4.61259
Particle_size_nm	Descriptor_ElasticNet	B2, logB, C2, AC	4	4.04816	2.87882	-0.0943254	4.69586
Particle_size_nm	Descriptor_ElasticNet	B2, logB, AB, AC	4	4.20421	3.01277	-0.180319	4.87688
Particle_size_nm	Descriptor_ElasticNet	B2, C2, AB, AC	4	4.99744	3.62141	-0.667737	5.79704
Particle_size_nm	Descriptor_ElasticNet	B, logC, sqrtC, C	4	4.60457	2.8431	-0.415822	5.3413
Particle_size_nm	Descriptor_ElasticNet	B, logC, sqrtC, logB	4	3.99181	2.51094	-0.0640741	4.6305
Particle_size_nm	Descriptor_ElasticNet	B, logC, sqrtC, C2	4	4.72072	2.89644	-0.488153	5.47603
Particle_size_nm	Descriptor_ElasticNet	B, logC, sqrtC, AB	4	4.79108	3.11142	-0.532848	5.55766
Particle_size_nm	Descriptor_ElasticNet	B, logC, sqrtC, AC	4	4.86967	3.12686	-0.583546	5.64882
Particle_size_nm	Descriptor_ElasticNet	B, logC, C, logB	4	4.10937	2.53107	-0.127673	4.76687
Particle_size_nm	Descriptor_ElasticNet	B, logC, C, C2	4	4.71642	2.89534	-0.485445	5.47105
Particle_size_nm	Descriptor_ElasticNet	B, logC, C, AB	4	4.92529	3.12574	-0.619927	5.71334
Particle_size_nm	Descriptor_ElasticNet	B, logC, C, AC	4	5.00729	3.14631	-0.674317	5.80846
Particle_size_nm	Descriptor_ElasticNet	B, logC, logB, C2	4	4.21281	2.55914	-0.185156	4.88686
Particle_size_nm	Descriptor_ElasticNet	B, logC, logB, AB	4	4.15274	2.62153	-0.151596	4.81717
Particle_size_nm	Descriptor_ElasticNet	B, logC, logB, AC	4	4.24844	2.62776	-0.20529	4.9282
Particle_size_nm	Descriptor_ElasticNet	B, logC, C2, AB	4	5.03556	3.17673	-0.693275	5.84125
Particle_size_nm	Descriptor_ElasticNet	B, logC, C2, AC	4	5.11624	3.19676	-0.747968	5.93484
Particle_size_nm	Descriptor_ElasticNet	B, logC, AB, AC	4	4.94725	3.31557	-0.634403	5.73881
Particle_size_nm	Descriptor_ElasticNet	B, sqrtC, C, logB	4	3.99179	2.52662	-0.0640599	4.63047
Particle_size_nm	Descriptor_ElasticNet	B, sqrtC, C, C2	4	4.6792	2.88397	-0.462094	5.42788
Particle_size_nm	Descriptor_ElasticNet	B, sqrtC, C, AB	4	4.80289	3.15015	-0.540414	5.57136
Particle_size_nm	Descriptor_ElasticNet	B, sqrtC, C, AC	4	4.88112	3.16888	-0.591003	5.6621
Particle_size_nm	Descriptor_ElasticNet	B, sqrtC, logB, C2	4	4.1823	2.54796	-0.168053	4.85147
Particle_size_nm	Descriptor_ElasticNet	B, sqrtC, logB, AB	4	4.16818	2.68603	-0.160179	4.83509
Particle_size_nm	Descriptor_ElasticNet	B, sqrtC, logB, AC	4	4.2566	2.67773	-0.209919	4.93765
Particle_size_nm	Descriptor_ElasticNet	B, sqrtC, C2, AB	4	4.9982	3.16601	-0.668242	5.79791
Particle_size_nm	Descriptor_ElasticNet	B, sqrtC, C2, AC	4	5.07794	3.18545	-0.721894	5.89041
Particle_size_nm	Descriptor_ElasticNet	B, sqrtC, AB, AC	4	4.97711	3.41649	-0.654192	5.77345
Particle_size_nm	Descriptor_ElasticNet	B, C, logB, C2	4	4.11132	2.55036	-0.128743	4.76914
Particle_size_nm	Descriptor_ElasticNet	B, C, logB, AB	4	4.18686	2.75704	-0.170598	4.85675
Particle_size_nm	Descriptor_ElasticNet	B, C, logB, AC	4	4.26929	2.75689	-0.217144	4.95237
Particle_size_nm	Descriptor_ElasticNet	B, C, C2, AB	4	4.92799	3.16334	-0.621705	5.71647
Particle_size_nm	Descriptor_ElasticNet	B, C, C2, AC	4	5.00588	3.18099	-0.673372	5.80682
Particle_size_nm	Descriptor_ElasticNet	B, C, AB, AC	4	5.02654	3.55417	-0.687212	5.83079
Particle_size_nm	Descriptor_ElasticNet	B, logB, C2, AB	4	4.22974	2.88619	-0.194699	4.9065
Particle_size_nm	Descriptor_ElasticNet	B, logB, C2, AC	4	4.30631	2.89021	-0.238344	4.99532
Particle_size_nm	Descriptor_ElasticNet	B, logB, AB, AC	4	4.4519	2.95733	-0.323495	5.1642
Particle_size_nm	Descriptor_ElasticNet	B, C2, AB, AC	4	5.12849	3.75646	-0.756351	5.94905
Particle_size_nm	Descriptor_ElasticNet	logC, sqrtC, C, logB	4	4.71326	2.99555	-0.483452	5.46738
Particle_size_nm	Descriptor_ElasticNet	logC, sqrtC, C, C2	4	4.62737	3.32237	-0.429883	5.36775
Particle_size_nm	Descriptor_ElasticNet	logC, sqrtC, C, AB	4	4.72997	3.26383	-0.493993	5.48677
Particle_size_nm	Descriptor_ElasticNet	logC, sqrtC, C, AC	4	4.98266	3.56885	-0.657886	5.77989
Particle_size_nm	Descriptor_ElasticNet	logC, sqrtC, logB, C2	4	4.83203	3.04588	-0.559162	5.60516
Particle_size_nm	Descriptor_ElasticNet	logC, sqrtC, logB, AB	4	4.89422	3.20469	-0.599553	5.6773
Particle_size_nm	Descriptor_ElasticNet	logC, sqrtC, logB, AC	4	4.98592	3.23719	-0.660054	5.78367
Particle_size_nm	Descriptor_ElasticNet	logC, sqrtC, C2, AB	4	4.82718	3.32926	-0.556033	5.59953
Particle_size_nm	Descriptor_ElasticNet	logC, sqrtC, C2, AC	4	5.08163	3.66345	-0.724401	5.89469
Particle_size_nm	Descriptor_ElasticNet	logC, sqrtC, AB, AC	4	4.54691	3.0594	-0.380586	5.27441
Particle_size_nm	Descriptor_ElasticNet	logC, C, logB, C2	4	4.82778	3.04412	-0.556416	5.60022
Particle_size_nm	Descriptor_ElasticNet	logC, C, logB, AB	4	5.03182	3.26615	-0.690757	5.83691
Particle_size_nm	Descriptor_ElasticNet	logC, C, logB, AC	4	5.12942	3.31135	-0.756983	5.95012
Particle_size_nm	Descriptor_ElasticNet	logC, C, C2, AB	4	4.82592	3.32751	-0.555218	5.59806
Particle_size_nm	Descriptor_ElasticNet	logC, C, C2, AC	4	5.08033	3.6609	-0.723518	5.89319
Particle_size_nm	Descriptor_ElasticNet	logC, C, AB, AC	4	4.67606	3.13482	-0.460129	5.42423
Particle_size_nm	Descriptor_ElasticNet	logC, logB, C2, AB	4	5.14554	3.31389	-0.768043	5.96882
Particle_size_nm	Descriptor_ElasticNet	logC, logB, C2, AC	4	5.24348	3.36027	-0.835994	6.08244
Particle_size_nm	Descriptor_ElasticNet	logC, logB, AB, AC	4	4.86662	3.33748	-0.581565	5.64528
Particle_size_nm	Descriptor_ElasticNet	logC, C2, AB, AC	4	4.77911	3.20287	-0.525196	5.54377
Particle_size_nm	Descriptor_ElasticNet	sqrtC, C, logB, C2	4	4.78859	3.02873	-0.531255	5.55477
Particle_size_nm	Descriptor_ElasticNet	sqrtC, C, logB, AB	4	4.90742	3.22861	-0.608191	5.6926
Particle_size_nm	Descriptor_ElasticNet	sqrtC, C, logB, AC	4	5.00111	3.26604	-0.670184	5.80129
Particle_size_nm	Descriptor_ElasticNet	sqrtC, C, C2, AB	4	4.80229	3.30698	-0.540028	5.57066
Particle_size_nm	Descriptor_ElasticNet	sqrtC, C, C2, AC	4	5.0542	3.6282	-0.705829	5.86287
Particle_size_nm	Descriptor_ElasticNet	sqrtC, C, AB, AC	4	4.57862	3.13431	-0.399909	5.31119
Particle_size_nm	Descriptor_ElasticNet	sqrtC, logB, C2, AB	4	5.10756	3.29914	-0.742044	5.92477
Particle_size_nm	Descriptor_ElasticNet	sqrtC, logB, C2, AC	4	5.20429	3.34492	-0.808653	6.03698
Particle_size_nm	Descriptor_ElasticNet	sqrtC, logB, AB, AC	4	4.90482	3.42193	-0.606491	5.68959
Particle_size_nm	Descriptor_ElasticNet	sqrtC, C2, AB, AC	4	4.75626	3.20108	-0.510646	5.51726
Particle_size_nm	Descriptor_ElasticNet	C, logB, C2, AB	4	5.03598	3.26873	-0.693553	5.84173
Particle_size_nm	Descriptor_ElasticNet	C, logB, C2, AC	4	5.13029	3.31342	-0.757581	5.95114
Particle_size_nm	Descriptor_ElasticNet	C, logB, AB, AC	4	4.98152	3.54052	-0.657127	5.77857
Particle_size_nm	Descriptor_ElasticNet	C, C2, AB, AC	4	4.71667	3.22229	-0.485603	5.47134
Particle_size_nm	Descriptor_ElasticNet	logB, C2, AB, AC	4	5.15414	3.78964	-0.773964	5.97881
Particle_size_nm	Random_Forest	BC, B2	2	3.85703	2.65295	0.00656743	4.1656
Particle_size_nm	Random_Forest	BC, B	2	3.85703	2.65295	0.00656743	4.1656
Particle_size_nm	Random_Forest	BC, logC	2	4.45044	2.96482	-0.322627	4.80648
Particle_size_nm	Random_Forest	BC, sqrtC	2	4.45044	2.96482	-0.322627	4.80648
Particle_size_nm	Random_Forest	BC, C	2	4.45044	2.96482	-0.322627	4.80648
Particle_size_nm	Random_Forest	BC, logB	2	3.85715	2.65295	0.006506	4.16573
Particle_size_nm	Random_Forest	BC, C2	2	4.45044	2.96482	-0.322627	4.80648
Particle_size_nm	Random_Forest	BC, AB	2	4.77828	3.27481	-0.524668	5.16055
Particle_size_nm	Random_Forest	BC, AC	2	4.09863	2.80617	-0.121783	4.42652
Particle_size_nm	Random_Forest	B2, B	2	3.59307	2.71359	0.137889	3.88052
Particle_size_nm	Random_Forest	B2, logC	2	3.74062	2.4776	0.0656324	4.03987
Particle_size_nm	Random_Forest	B2, sqrtC	2	3.74062	2.4776	0.0656324	4.03987
Particle_size_nm	Random_Forest	B2, C	2	3.71663	2.48058	0.0775748	4.01396
Particle_size_nm	Random_Forest	B2, logB	2	3.59307	2.71359	0.137889	3.88052
Particle_size_nm	Random_Forest	B2, C2	2	3.71663	2.48058	0.0775748	4.01396
Particle_size_nm	Random_Forest	B2, AB	2	4.29626	2.9904	-0.232571	4.63996
Particle_size_nm	Random_Forest	B2, AC	2	3.60041	2.6001	0.134362	3.88845
Particle_size_nm	Random_Forest	B, logC	2	3.74062	2.4776	0.0656324	4.03987
Particle_size_nm	Random_Forest	B, sqrtC	2	3.74062	2.4776	0.0656324	4.03987
Particle_size_nm	Random_Forest	B, C	2	3.71663	2.48058	0.0775748	4.01396
Particle_size_nm	Random_Forest	B, logB	2	3.59307	2.71359	0.137889	3.88052
Particle_size_nm	Random_Forest	B, C2	2	3.71663	2.48058	0.0775748	4.01396
Particle_size_nm	Random_Forest	B, AB	2	4.29626	2.9904	-0.232571	4.63996
Particle_size_nm	Random_Forest	B, AC	2	3.60041	2.6001	0.134362	3.88845
Particle_size_nm	Random_Forest	logC, sqrtC	2	4.71074	3.3819	-0.481871	5.0876
Particle_size_nm	Random_Forest	logC, C	2	4.71074	3.3819	-0.481871	5.0876
Particle_size_nm	Random_Forest	logC, logB	2	3.7385	2.46774	0.0666913	4.03758
Particle_size_nm	Random_Forest	logC, C2	2	4.71074	3.3819	-0.481871	5.0876
Particle_size_nm	Random_Forest	logC, AB	2	5.36611	3.84886	-0.922871	5.7954
Particle_size_nm	Random_Forest	logC, AC	2	5.2503	3.92447	-0.840768	5.67032
Particle_size_nm	Random_Forest	sqrtC, C	2	4.71074	3.3819	-0.481871	5.0876
Particle_size_nm	Random_Forest	sqrtC, logB	2	3.7385	2.46774	0.0666913	4.03758
Particle_size_nm	Random_Forest	sqrtC, C2	2	4.71074	3.3819	-0.481871	5.0876
Particle_size_nm	Random_Forest	sqrtC, AB	2	5.36611	3.84886	-0.922871	5.7954
Particle_size_nm	Random_Forest	sqrtC, AC	2	5.2503	3.92447	-0.840768	5.67032
Particle_size_nm	Random_Forest	C, logB	2	3.71752	2.47072	0.0771348	4.01492
Particle_size_nm	Random_Forest	C, C2	2	4.71074	3.3819	-0.481871	5.0876
Particle_size_nm	Random_Forest	C, AB	2	5.53207	4.09786	-1.04365	5.97464
Particle_size_nm	Random_Forest	C, AC	2	5.24857	3.92369	-0.839556	5.66845
Particle_size_nm	Random_Forest	logB, C2	2	3.72269	2.47901	0.0745655	4.02051
Particle_size_nm	Random_Forest	logB, AB	2	4.29677	2.99064	-0.232865	4.64051
Particle_size_nm	Random_Forest	logB, AC	2	3.65564	2.63397	0.107604	3.94809
Particle_size_nm	Random_Forest	C2, AB	2	5.53207	4.09786	-1.04365	5.97464
Particle_size_nm	Random_Forest	C2, AC	2	5.24857	3.92369	-0.839556	5.66845
Particle_size_nm	Random_Forest	AB, AC	2	4.90794	3.65361	-0.608533	5.30057
Particle_size_nm	Random_Forest	BC, B2, B	3	3.83801	2.61009	0.0163417	4.29857
Particle_size_nm	Random_Forest	BC, B2, logC	3	3.8289	2.51621	0.0210053	4.28837
Particle_size_nm	Random_Forest	BC, B2, sqrtC	3	3.8289	2.51621	0.0210053	4.28837
Particle_size_nm	Random_Forest	BC, B2, C	3	3.82866	2.51532	0.0211277	4.2881
Particle_size_nm	Random_Forest	BC, B2, logB	3	3.83801	2.61009	0.0163417	4.29857
Particle_size_nm	Random_Forest	BC, B2, C2	3	3.82866	2.51532	0.0211277	4.2881
Particle_size_nm	Random_Forest	BC, B2, AB	3	4.61063	3.26184	-0.419554	5.1639
Particle_size_nm	Random_Forest	BC, B2, AC	3	3.63008	2.54456	0.120037	4.06569
Particle_size_nm	Random_Forest	BC, B, logC	3	3.8289	2.51621	0.0210053	4.28837
Particle_size_nm	Random_Forest	BC, B, sqrtC	3	3.8289	2.51621	0.0210053	4.28837
Particle_size_nm	Random_Forest	BC, B, C	3	3.82866	2.51532	0.0211277	4.2881
Particle_size_nm	Random_Forest	BC, B, logB	3	3.83801	2.61009	0.0163417	4.29857
Particle_size_nm	Random_Forest	BC, B, C2	3	3.82866	2.51532	0.0211277	4.2881
Particle_size_nm	Random_Forest	BC, B, AB	3	4.61063	3.26184	-0.419554	5.1639
Particle_size_nm	Random_Forest	BC, B, AC	3	3.63008	2.54456	0.120037	4.06569
Particle_size_nm	Random_Forest	BC, logC, sqrtC	3	4.51011	3.03699	-0.358329	5.05132
Particle_size_nm	Random_Forest	BC, logC, C	3	4.51011	3.03699	-0.358329	5.05132
Particle_size_nm	Random_Forest	BC, logC, logB	3	3.84468	2.55144	0.0129225	4.30604
Particle_size_nm	Random_Forest	BC, logC, C2	3	4.51011	3.03699	-0.358329	5.05132
Particle_size_nm	Random_Forest	BC, logC, AB	3	4.8435	3.24517	-0.566569	5.42472
Particle_size_nm	Random_Forest	BC, logC, AC	3	4.13395	2.81853	-0.141201	4.63003
Particle_size_nm	Random_Forest	BC, sqrtC, C	3	4.51011	3.03699	-0.358329	5.05132
Particle_size_nm	Random_Forest	BC, sqrtC, logB	3	3.84468	2.55144	0.0129225	4.30604
Particle_size_nm	Random_Forest	BC, sqrtC, C2	3	4.51011	3.03699	-0.358329	5.05132
Particle_size_nm	Random_Forest	BC, sqrtC, AB	3	4.8435	3.24517	-0.566569	5.42472
Particle_size_nm	Random_Forest	BC, sqrtC, AC	3	4.13395	2.81853	-0.141201	4.63003
Particle_size_nm	Random_Forest	BC, C, logB	3	3.84468	2.55144	0.0129225	4.30604
Particle_size_nm	Random_Forest	BC, C, C2	3	4.51011	3.03699	-0.358329	5.05132
Particle_size_nm	Random_Forest	BC, C, AB	3	4.88963	3.31746	-0.596552	5.47638
Particle_size_nm	Random_Forest	BC, C, AC	3	4.13384	2.81842	-0.141142	4.6299
Particle_size_nm	Random_Forest	BC, logB, C2	3	3.82866	2.51532	0.0211277	4.2881
Particle_size_nm	Random_Forest	BC, logB, AB	3	4.61132	3.26119	-0.419981	5.16468
Particle_size_nm	Random_Forest	BC, logB, AC	3	3.62925	2.54507	0.120439	4.06476
Particle_size_nm	Random_Forest	BC, C2, AB	3	4.88963	3.31746	-0.596552	5.47638
Particle_size_nm	Random_Forest	BC, C2, AC	3	4.13384	2.81842	-0.141142	4.6299
Particle_size_nm	Random_Forest	BC, AB, AC	3	4.24292	2.82325	-0.202157	4.75207
Particle_size_nm	Random_Forest	B2, B, logC	3	3.73995	2.47771	0.0659659	4.18874
Particle_size_nm	Random_Forest	B2, B, sqrtC	3	3.73995	2.47771	0.0659659	4.18874
Particle_size_nm	Random_Forest	B2, B, C	3	3.71603	2.48069	0.0778735	4.16196
Particle_size_nm	Random_Forest	B2, B, logB	3	3.59307	2.71359	0.137889	4.02424
Particle_size_nm	Random_Forest	B2, B, C2	3	3.71603	2.48069	0.0778735	4.16196
Particle_size_nm	Random_Forest	B2, B, AB	3	4.30106	2.98918	-0.235327	4.81718
Particle_size_nm	Random_Forest	B2, B, AC	3	3.60103	2.60205	0.134067	4.03315
Particle_size_nm	Random_Forest	B2, logC, sqrtC	3	3.73981	2.47632	0.0660351	4.18859
Particle_size_nm	Random_Forest	B2, logC, C	3	3.7187	2.48358	0.0765478	4.16495
Particle_size_nm	Random_Forest	B2, logC, logB	3	3.74456	2.47929	0.0636604	4.19391
Particle_size_nm	Random_Forest	B2, logC, C2	3	3.7187	2.48358	0.0765478	4.16495
Particle_size_nm	Random_Forest	B2, logC, AB	3	4.45941	2.90118	-0.327967	4.99454
Particle_size_nm	Random_Forest	B2, logC, AC	3	3.78103	2.57526	0.0453337	4.23475
Particle_size_nm	Random_Forest	B2, sqrtC, C	3	3.7187	2.48358	0.0765478	4.16495
Particle_size_nm	Random_Forest	B2, sqrtC, logB	3	3.74456	2.47929	0.0636604	4.19391
Particle_size_nm	Random_Forest	B2, sqrtC, C2	3	3.7187	2.48358	0.0765478	4.16495
Particle_size_nm	Random_Forest	B2, sqrtC, AB	3	4.45941	2.90118	-0.327967	4.99454
Particle_size_nm	Random_Forest	B2, sqrtC, AC	3	3.78103	2.57526	0.0453337	4.23475
Particle_size_nm	Random_Forest	B2, C, logB	3	3.72069	2.48227	0.0755599	4.16717
Particle_size_nm	Random_Forest	B2, C, C2	3	3.71579	2.4793	0.077993	4.16169
Particle_size_nm	Random_Forest	B2, C, AB	3	4.62138	3.24346	-0.426179	5.17594
Particle_size_nm	Random_Forest	B2, C, AC	3	3.79513	2.6149	0.0382003	4.25054
Particle_size_nm	Random_Forest	B2, logB, C2	3	3.71293	2.47518	0.0794136	4.15848
Particle_size_nm	Random_Forest	B2, logB, AB	3	4.30185	2.9893	-0.235783	4.81807
Particle_size_nm	Random_Forest	B2, logB, AC	3	3.63294	2.62158	0.118653	4.06889
Particle_size_nm	Random_Forest	B2, C2, AB	3	4.62138	3.24346	-0.426179	5.17594
Particle_size_nm	Random_Forest	B2, C2, AC	3	3.79513	2.6149	0.0382003	4.25054
Particle_size_nm	Random_Forest	B2, AB, AC	3	3.99012	2.7988	-0.063173	4.46894
Particle_size_nm	Random_Forest	B, logC, sqrtC	3	3.73981	2.47632	0.0660351	4.18859
Particle_size_nm	Random_Forest	B, logC, C	3	3.7187	2.48358	0.0765478	4.16495
Particle_size_nm	Random_Forest	B, logC, logB	3	3.74456	2.47929	0.0636604	4.19391
Particle_size_nm	Random_Forest	B, logC, C2	3	3.7187	2.48358	0.0765478	4.16495
Particle_size_nm	Random_Forest	B, logC, AB	3	4.45941	2.90118	-0.327967	4.99454
Particle_size_nm	Random_Forest	B, logC, AC	3	3.78103	2.57526	0.0453337	4.23475
Particle_size_nm	Random_Forest	B, sqrtC, C	3	3.7187	2.48358	0.0765478	4.16495
Particle_size_nm	Random_Forest	B, sqrtC, logB	3	3.74456	2.47929	0.0636604	4.19391
Particle_size_nm	Random_Forest	B, sqrtC, C2	3	3.7187	2.48358	0.0765478	4.16495
Particle_size_nm	Random_Forest	B, sqrtC, AB	3	4.45941	2.90118	-0.327967	4.99454
Particle_size_nm	Random_Forest	B, sqrtC, AC	3	3.78103	2.57526	0.0453337	4.23475
Particle_size_nm	Random_Forest	B, C, logB	3	3.72069	2.48227	0.0755599	4.16717
Particle_size_nm	Random_Forest	B, C, C2	3	3.71579	2.4793	0.077993	4.16169
Particle_size_nm	Random_Forest	B, C, AB	3	4.62138	3.24346	-0.426179	5.17594
Particle_size_nm	Random_Forest	B, C, AC	3	3.79513	2.6149	0.0382003	4.25054
Particle_size_nm	Random_Forest	B, logB, C2	3	3.71293	2.47518	0.0794136	4.15848
Particle_size_nm	Random_Forest	B, logB, AB	3	4.30185	2.9893	-0.235783	4.81807
Particle_size_nm	Random_Forest	B, logB, AC	3	3.63294	2.62158	0.118653	4.06889
Particle_size_nm	Random_Forest	B, C2, AB	3	4.62138	3.24346	-0.426179	5.17594
Particle_size_nm	Random_Forest	B, C2, AC	3	3.79513	2.6149	0.0382003	4.25054
Particle_size_nm	Random_Forest	B, AB, AC	3	3.99012	2.7988	-0.063173	4.46894
Particle_size_nm	Random_Forest	logC, sqrtC, C	3	4.71074	3.3819	-0.481871	5.27603
Particle_size_nm	Random_Forest	logC, sqrtC, logB	3	3.73904	2.46798	0.0664215	4.18772
Particle_size_nm	Random_Forest	logC, sqrtC, C2	3	4.71074	3.3819	-0.481871	5.27603
Particle_size_nm	Random_Forest	logC, sqrtC, AB	3	5.37191	3.83948	-0.927034	6.01654
Particle_size_nm	Random_Forest	logC, sqrtC, AC	3	5.26289	3.92081	-0.84961	5.89444
Particle_size_nm	Random_Forest	logC, C, logB	3	3.71809	2.47384	0.0768537	4.16426
Particle_size_nm	Random_Forest	logC, C, C2	3	4.71074	3.3819	-0.481871	5.27603
Particle_size_nm	Random_Forest	logC, C, AB	3	5.44115	3.96634	-0.977028	6.09409
Particle_size_nm	Random_Forest	logC, C, AC	3	5.26266	3.92108	-0.849451	5.89418
Particle_size_nm	Random_Forest	logC, logB, C2	3	3.72401	2.48444	0.0739122	4.17089
Particle_size_nm	Random_Forest	logC, logB, AB	3	4.43136	2.86433	-0.311313	4.96313
Particle_size_nm	Random_Forest	logC, logB, AC	3	3.81276	2.5636	0.0292435	4.27029
Particle_size_nm	Random_Forest	logC, C2, AB	3	5.44115	3.96634	-0.977028	6.09409
Particle_size_nm	Random_Forest	logC, C2, AC	3	5.26266	3.92108	-0.849451	5.89418
Particle_size_nm	Random_Forest	logC, AB, AC	3	5.16689	3.79608	-0.782749	5.78692
Particle_size_nm	Random_Forest	sqrtC, C, logB	3	3.71809	2.47384	0.0768537	4.16426
Particle_size_nm	Random_Forest	sqrtC, C, C2	3	4.71074	3.3819	-0.481871	5.27603
Particle_size_nm	Random_Forest	sqrtC, C, AB	3	5.44115	3.96634	-0.977028	6.09409
Particle_size_nm	Random_Forest	sqrtC, C, AC	3	5.26266	3.92108	-0.849451	5.89418
Particle_size_nm	Random_Forest	sqrtC, logB, C2	3	3.72401	2.48444	0.0739122	4.17089
Particle_size_nm	Random_Forest	sqrtC, logB, AB	3	4.43136	2.86433	-0.311313	4.96313
Particle_size_nm	Random_Forest	sqrtC, logB, AC	3	3.81276	2.5636	0.0292435	4.27029
Particle_size_nm	Random_Forest	sqrtC, C2, AB	3	5.44115	3.96634	-0.977028	6.09409
Particle_size_nm	Random_Forest	sqrtC, C2, AC	3	5.26266	3.92108	-0.849451	5.89418
Particle_size_nm	Random_Forest	sqrtC, AB, AC	3	5.16689	3.79608	-0.782749	5.78692
Particle_size_nm	Random_Forest	C, logB, C2	3	3.72062	2.47268	0.0755938	4.1671
Particle_size_nm	Random_Forest	C, logB, AB	3	4.58962	3.2058	-0.406646	5.14037
Particle_size_nm	Random_Forest	C, logB, AC	3	3.83417	2.62497	0.0183085	4.29427
Particle_size_nm	Random_Forest	C, C2, AB	3	5.53452	4.08849	-1.04546	6.19867
Particle_size_nm	Random_Forest	C, C2, AC	3	5.26119	3.92003	-0.848412	5.89253
Particle_size_nm	Random_Forest	C, AB, AC	3	5.18708	3.81443	-0.796706	5.80953
Particle_size_nm	Random_Forest	logB, C2, AB	3	4.62445	3.24588	-0.428074	5.17938
Particle_size_nm	Random_Forest	logB, C2, AC	3	3.85174	2.65915	0.00929178	4.31395
Particle_size_nm	Random_Forest	logB, AB, AC	3	4.01589	2.81867	-0.0769478	4.49779
Particle_size_nm	Random_Forest	C2, AB, AC	3	5.18708	3.81443	-0.796706	5.80953
Particle_size_nm	Random_Forest	BC, B2, B, logC	4	3.81024	2.47917	0.0305267	4.41988
Particle_size_nm	Random_Forest	BC, B2, B, sqrtC	4	3.81024	2.47917	0.0305267	4.41988
Particle_size_nm	Random_Forest	BC, B2, B, C	4	3.81	2.47829	0.0306489	4.4196
Particle_size_nm	Random_Forest	BC, B2, B, logB	4	3.84378	2.59938	0.013381	4.45879
Particle_size_nm	Random_Forest	BC, B2, B, C2	4	3.81	2.47829	0.0306489	4.4196
Particle_size_nm	Random_Forest	BC, B2, B, AB	4	4.57653	3.25651	-0.398636	5.30878
Particle_size_nm	Random_Forest	BC, B2, B, AC	4	3.63826	2.54653	0.116069	4.22038
Particle_size_nm	Random_Forest	BC, B2, logC, sqrtC	4	3.83853	2.50605	0.0160776	4.45269
Particle_size_nm	Random_Forest	BC, B2, logC, C	4	3.83826	2.50517	0.0162172	4.45238
Particle_size_nm	Random_Forest	BC, B2, logC, logB	4	3.83725	2.53638	0.01673	4.45122
Particle_size_nm	Random_Forest	BC, B2, logC, C2	4	3.83826	2.50517	0.0162172	4.45238
Particle_size_nm	Random_Forest	BC, B2, logC, AB	4	4.5571	3.14609	-0.386782	5.28623
Particle_size_nm	Random_Forest	BC, B2, logC, AC	4	3.71132	2.59318	0.0802105	4.30513
Particle_size_nm	Random_Forest	BC, B2, sqrtC, C	4	3.83826	2.50517	0.0162172	4.45238
Particle_size_nm	Random_Forest	BC, B2, sqrtC, logB	4	3.83725	2.53638	0.01673	4.45122
Particle_size_nm	Random_Forest	BC, B2, sqrtC, C2	4	3.83826	2.50517	0.0162172	4.45238
Particle_size_nm	Random_Forest	BC, B2, sqrtC, AB	4	4.5571	3.14609	-0.386782	5.28623
Particle_size_nm	Random_Forest	BC, B2, sqrtC, AC	4	3.71132	2.59318	0.0802105	4.30513
Particle_size_nm	Random_Forest	BC, B2, C, logB	4	3.83742	2.53638	0.0166443	4.45141
Particle_size_nm	Random_Forest	BC, B2, C, C2	4	3.83842	2.50517	0.0161316	4.45257
Particle_size_nm	Random_Forest	BC, B2, C, AB	4	4.60102	3.21302	-0.413643	5.33718
Particle_size_nm	Random_Forest	BC, B2, C, AC	4	3.71128	2.59313	0.0802281	4.30509
Particle_size_nm	Random_Forest	BC, B2, logB, C2	4	3.81	2.47829	0.0306489	4.4196
Particle_size_nm	Random_Forest	BC, B2, logB, AB	4	4.57679	3.25651	-0.398795	5.30908
Particle_size_nm	Random_Forest	BC, B2, logB, AC	4	3.64433	2.55145	0.113117	4.22742
Particle_size_nm	Random_Forest	BC, B2, C2, AB	4	4.60102	3.21302	-0.413643	5.33718
Particle_size_nm	Random_Forest	BC, B2, C2, AC	4	3.71128	2.59313	0.0802281	4.30509
Particle_size_nm	Random_Forest	BC, B2, AB, AC	4	4.02876	2.79198	-0.0838632	4.67336
Particle_size_nm	Random_Forest	BC, B, logC, sqrtC	4	3.83853	2.50605	0.0160776	4.45269
Particle_size_nm	Random_Forest	BC, B, logC, C	4	3.83826	2.50517	0.0162172	4.45238
Particle_size_nm	Random_Forest	BC, B, logC, logB	4	3.83725	2.53638	0.01673	4.45122
Particle_size_nm	Random_Forest	BC, B, logC, C2	4	3.83826	2.50517	0.0162172	4.45238
Particle_size_nm	Random_Forest	BC, B, logC, AB	4	4.5571	3.14609	-0.386782	5.28623
Particle_size_nm	Random_Forest	BC, B, logC, AC	4	3.71132	2.59318	0.0802105	4.30513
Particle_size_nm	Random_Forest	BC, B, sqrtC, C	4	3.83826	2.50517	0.0162172	4.45238
Particle_size_nm	Random_Forest	BC, B, sqrtC, logB	4	3.83725	2.53638	0.01673	4.45122
Particle_size_nm	Random_Forest	BC, B, sqrtC, C2	4	3.83826	2.50517	0.0162172	4.45238
Particle_size_nm	Random_Forest	BC, B, sqrtC, AB	4	4.5571	3.14609	-0.386782	5.28623
Particle_size_nm	Random_Forest	BC, B, sqrtC, AC	4	3.71132	2.59318	0.0802105	4.30513
Particle_size_nm	Random_Forest	BC, B, C, logB	4	3.83742	2.53638	0.0166443	4.45141
Particle_size_nm	Random_Forest	BC, B, C, C2	4	3.83842	2.50517	0.0161316	4.45257
Particle_size_nm	Random_Forest	BC, B, C, AB	4	4.60102	3.21302	-0.413643	5.33718
Particle_size_nm	Random_Forest	BC, B, C, AC	4	3.71128	2.59313	0.0802281	4.30509
Particle_size_nm	Random_Forest	BC, B, logB, C2	4	3.81	2.47829	0.0306489	4.4196
Particle_size_nm	Random_Forest	BC, B, logB, AB	4	4.57679	3.25651	-0.398795	5.30908
Particle_size_nm	Random_Forest	BC, B, logB, AC	4	3.64433	2.55145	0.113117	4.22742
Particle_size_nm	Random_Forest	BC, B, C2, AB	4	4.60102	3.21302	-0.413643	5.33718
Particle_size_nm	Random_Forest	BC, B, C2, AC	4	3.71128	2.59313	0.0802281	4.30509
Particle_size_nm	Random_Forest	BC, B, AB, AC	4	4.02876	2.79198	-0.0838632	4.67336
Particle_size_nm	Random_Forest	BC, logC, sqrtC, C	4	4.51499	3.032	-0.361275	5.23739
Particle_size_nm	Random_Forest	BC, logC, sqrtC, logB	4	3.8498	2.50205	0.0102904	4.46577
Particle_size_nm	Random_Forest	BC, logC, sqrtC, C2	4	4.51499	3.032	-0.361275	5.23739
Particle_size_nm	Random_Forest	BC, logC, sqrtC, AB	4	4.8028	3.19228	-0.540357	5.57125
Particle_size_nm	Random_Forest	BC, logC, sqrtC, AC	4	4.14421	2.83695	-0.146872	4.80728
Particle_size_nm	Random_Forest	BC, logC, C, logB	4	3.84997	2.50205	0.0102048	4.46596
Particle_size_nm	Random_Forest	BC, logC, C, C2	4	4.51499	3.032	-0.361275	5.23739
Particle_size_nm	Random_Forest	BC, logC, C, AB	4	4.82188	3.23361	-0.552619	5.59339
Particle_size_nm	Random_Forest	BC, logC, C, AC	4	4.14415	2.8369	-0.146839	4.80721
Particle_size_nm	Random_Forest	BC, logC, logB, C2	4	3.82783	2.46727	0.0215547	4.44028
Particle_size_nm	Random_Forest	BC, logC, logB, AB	4	4.55647	3.15561	-0.386399	5.2855
Particle_size_nm	Random_Forest	BC, logC, logB, AC	4	3.7045	2.58427	0.0835877	4.29722
Particle_size_nm	Random_Forest	BC, logC, C2, AB	4	4.82188	3.23361	-0.552619	5.59339
Particle_size_nm	Random_Forest	BC, logC, C2, AC	4	4.14415	2.8369	-0.146839	4.80721
Particle_size_nm	Random_Forest	BC, logC, AB, AC	4	4.339	2.95307	-0.25722	5.03324
Particle_size_nm	Random_Forest	BC, sqrtC, C, logB	4	3.84997	2.50205	0.0102048	4.46596
Particle_size_nm	Random_Forest	BC, sqrtC, C, C2	4	4.51499	3.032	-0.361275	5.23739
Particle_size_nm	Random_Forest	BC, sqrtC, C, AB	4	4.82188	3.23361	-0.552619	5.59339
Particle_size_nm	Random_Forest	BC, sqrtC, C, AC	4	4.14415	2.8369	-0.146839	4.80721
Particle_size_nm	Random_Forest	BC, sqrtC, logB, C2	4	3.82783	2.46727	0.0215547	4.44028
Particle_size_nm	Random_Forest	BC, sqrtC, logB, AB	4	4.55647	3.15561	-0.386399	5.2855
Particle_size_nm	Random_Forest	BC, sqrtC, logB, AC	4	3.7045	2.58427	0.0835877	4.29722
Particle_size_nm	Random_Forest	BC, sqrtC, C2, AB	4	4.82188	3.23361	-0.552619	5.59339
Particle_size_nm	Random_Forest	BC, sqrtC, C2, AC	4	4.14415	2.8369	-0.146839	4.80721
Particle_size_nm	Random_Forest	BC, sqrtC, AB, AC	4	4.339	2.95307	-0.25722	5.03324
Particle_size_nm	Random_Forest	BC, C, logB, C2	4	3.828	2.46727	0.0214691	4.44048
Particle_size_nm	Random_Forest	BC, C, logB, AB	4	4.60027	3.22166	-0.41318	5.33631
Particle_size_nm	Random_Forest	BC, C, logB, AC	4	3.70447	2.58423	0.0836038	4.29718
Particle_size_nm	Random_Forest	BC, C, C2, AB	4	4.8667	3.2964	-0.581614	5.64537
Particle_size_nm	Random_Forest	BC, C, C2, AC	4	4.14406	2.83681	-0.14679	4.80711
Particle_size_nm	Random_Forest	BC, C, AB, AC	4	4.3266	2.94485	-0.250042	5.01885
Particle_size_nm	Random_Forest	BC, logB, C2, AB	4	4.60215	3.21356	-0.41434	5.3385
Particle_size_nm	Random_Forest	BC, logB, C2, AC	4	3.71328	2.59439	0.0792411	4.3074
Particle_size_nm	Random_Forest	BC, logB, AB, AC	4	4.03096	2.79344	-0.0850443	4.67591
Particle_size_nm	Random_Forest	BC, C2, AB, AC	4	4.3266	2.94485	-0.250042	5.01885
Particle_size_nm	Random_Forest	B2, B, logC, sqrtC	4	3.73882	2.47752	0.0665306	4.33703
Particle_size_nm	Random_Forest	B2, B, logC, C	4	3.71414	2.4747	0.0788148	4.3084
Particle_size_nm	Random_Forest	B2, B, logC, logB	4	3.74333	2.47983	0.0642771	4.34226
Particle_size_nm	Random_Forest	B2, B, logC, C2	4	3.71414	2.4747	0.0788148	4.3084
Particle_size_nm	Random_Forest	B2, B, logC, AB	4	4.38549	2.84528	-0.284306	5.08717
Particle_size_nm	Random_Forest	B2, B, logC, AC	4	3.76195	2.53316	0.0549448	4.36386
Particle_size_nm	Random_Forest	B2, B, sqrtC, C	4	3.71414	2.4747	0.0788148	4.3084
Particle_size_nm	Random_Forest	B2, B, sqrtC, logB	4	3.74333	2.47983	0.0642771	4.34226
Particle_size_nm	Random_Forest	B2, B, sqrtC, C2	4	3.71414	2.4747	0.0788148	4.3084
Particle_size_nm	Random_Forest	B2, B, sqrtC, AB	4	4.38549	2.84528	-0.284306	5.08717
Particle_size_nm	Random_Forest	B2, B, sqrtC, AC	4	3.76195	2.53316	0.0549448	4.36386
Particle_size_nm	Random_Forest	B2, B, C, logB	4	3.71949	2.48281	0.0761586	4.3146
Particle_size_nm	Random_Forest	B2, B, C, C2	4	3.71497	2.4805	0.0784001	4.30937
Particle_size_nm	Random_Forest	B2, B, C, AB	4	4.55453	3.19493	-0.385222	5.28326
Particle_size_nm	Random_Forest	B2, B, C, AC	4	3.78388	2.60832	0.0438959	4.3893
Particle_size_nm	Random_Forest	B2, B, logB, C2	4	3.72262	2.48748	0.0746032	4.31823
Particle_size_nm	Random_Forest	B2, B, logB, AB	4	4.27684	2.96702	-0.221453	4.96113
Particle_size_nm	Random_Forest	B2, B, logB, AC	4	3.61696	2.61506	0.126388	4.19567
Particle_size_nm	Random_Forest	B2, B, C2, AB	4	4.55453	3.19493	-0.385222	5.28326
Particle_size_nm	Random_Forest	B2, B, C2, AC	4	3.78388	2.60832	0.0438959	4.3893
Particle_size_nm	Random_Forest	B2, B, AB, AC	4	4.00937	2.78586	-0.0734559	4.65087
Particle_size_nm	Random_Forest	B2, logC, sqrtC, C	4	3.71817	2.4724	0.0768111	4.31308
Particle_size_nm	Random_Forest	B2, logC, sqrtC, logB	4	3.73884	2.47394	0.0665203	4.33705
Particle_size_nm	Random_Forest	B2, logC, sqrtC, C2	4	3.71817	2.4724	0.0768111	4.31308
Particle_size_nm	Random_Forest	B2, logC, sqrtC, AB	4	4.39881	2.84629	-0.292119	5.10262
Particle_size_nm	Random_Forest	B2, logC, sqrtC, AC	4	3.77838	2.51275	0.0466691	4.38293
Particle_size_nm	Random_Forest	B2, logC, C, logB	4	3.71622	2.47765	0.0777813	4.31081
Particle_size_nm	Random_Forest	B2, logC, C, C2	4	3.70933	2.46943	0.0811968	4.30282
Particle_size_nm	Random_Forest	B2, logC, C, AB	4	4.4579	3.00098	-0.327063	5.17116
Particle_size_nm	Random_Forest	B2, logC, C, AC	4	3.79693	2.58899	0.0372854	4.40444
Particle_size_nm	Random_Forest	B2, logC, logB, C2	4	3.72034	2.48882	0.0757328	4.3156
Particle_size_nm	Random_Forest	B2, logC, logB, AB	4	4.40963	2.8581	-0.298484	5.11517
Particle_size_nm	Random_Forest	B2, logC, logB, AC	4	3.76991	2.5332	0.0509424	4.37309
Particle_size_nm	Random_Forest	B2, logC, C2, AB	4	4.4579	3.00098	-0.327063	5.17116
Particle_size_nm	Random_Forest	B2, logC, C2, AC	4	3.79693	2.58899	0.0372854	4.40444
Particle_size_nm	Random_Forest	B2, logC, AB, AC	4	4.07437	2.71056	-0.108542	4.72627
Particle_size_nm	Random_Forest	B2, sqrtC, C, logB	4	3.71622	2.47765	0.0777813	4.31081
Particle_size_nm	Random_Forest	B2, sqrtC, C, C2	4	3.70933	2.46943	0.0811968	4.30282
Particle_size_nm	Random_Forest	B2, sqrtC, C, AB	4	4.4579	3.00098	-0.327063	5.17116
Particle_size_nm	Random_Forest	B2, sqrtC, C, AC	4	3.79693	2.58899	0.0372854	4.40444
Particle_size_nm	Random_Forest	B2, sqrtC, logB, C2	4	3.72034	2.48882	0.0757328	4.3156
Particle_size_nm	Random_Forest	B2, sqrtC, logB, AB	4	4.40963	2.8581	-0.298484	5.11517
Particle_size_nm	Random_Forest	B2, sqrtC, logB, AC	4	3.76991	2.5332	0.0509424	4.37309
Particle_size_nm	Random_Forest	B2, sqrtC, C2, AB	4	4.4579	3.00098	-0.327063	5.17116
Particle_size_nm	Random_Forest	B2, sqrtC, C2, AC	4	3.79693	2.58899	0.0372854	4.40444
Particle_size_nm	Random_Forest	B2, sqrtC, AB, AC	4	4.07437	2.71056	-0.108542	4.72627
Particle_size_nm	Random_Forest	B2, C, logB, C2	4	3.71657	2.47844	0.0776056	4.31122
Particle_size_nm	Random_Forest	B2, C, logB, AB	4	4.57173	3.20657	-0.395703	5.30321
Particle_size_nm	Random_Forest	B2, C, logB, AC	4	3.79134	2.62378	0.0401222	4.39795
Particle_size_nm	Random_Forest	B2, C, C2, AB	4	4.55743	3.18398	-0.386984	5.28662
Particle_size_nm	Random_Forest	B2, C, C2, AC	4	3.82128	2.64901	0.0249007	4.43268
Particle_size_nm	Random_Forest	B2, C, AB, AC	4	4.11177	2.80361	-0.128986	4.76965
Particle_size_nm	Random_Forest	B2, logB, C2, AB	4	4.55612	3.19546	-0.386188	5.2851
Particle_size_nm	Random_Forest	B2, logB, C2, AC	4	3.81148	2.62601	0.0298962	4.42131
Particle_size_nm	Random_Forest	B2, logB, AB, AC	4	4.0173	2.79277	-0.0777041	4.66007
Particle_size_nm	Random_Forest	B2, C2, AB, AC	4	4.11177	2.80361	-0.128986	4.76965
Particle_size_nm	Random_Forest	B, logC, sqrtC, C	4	3.71817	2.4724	0.0768111	4.31308
Particle_size_nm	Random_Forest	B, logC, sqrtC, logB	4	3.73884	2.47394	0.0665203	4.33705
Particle_size_nm	Random_Forest	B, logC, sqrtC, C2	4	3.71817	2.4724	0.0768111	4.31308
Particle_size_nm	Random_Forest	B, logC, sqrtC, AB	4	4.39881	2.84629	-0.292119	5.10262
Particle_size_nm	Random_Forest	B, logC, sqrtC, AC	4	3.77838	2.51275	0.0466691	4.38293
Particle_size_nm	Random_Forest	B, logC, C, logB	4	3.71622	2.47765	0.0777813	4.31081
Particle_size_nm	Random_Forest	B, logC, C, C2	4	3.70933	2.46943	0.0811968	4.30282
Particle_size_nm	Random_Forest	B, logC, C, AB	4	4.4579	3.00098	-0.327063	5.17116
Particle_size_nm	Random_Forest	B, logC, C, AC	4	3.79693	2.58899	0.0372854	4.40444
Particle_size_nm	Random_Forest	B, logC, logB, C2	4	3.72034	2.48882	0.0757328	4.3156
Particle_size_nm	Random_Forest	B, logC, logB, AB	4	4.40963	2.8581	-0.298484	5.11517
Particle_size_nm	Random_Forest	B, logC, logB, AC	4	3.76991	2.5332	0.0509424	4.37309
Particle_size_nm	Random_Forest	B, logC, C2, AB	4	4.4579	3.00098	-0.327063	5.17116
Particle_size_nm	Random_Forest	B, logC, C2, AC	4	3.79693	2.58899	0.0372854	4.40444
Particle_size_nm	Random_Forest	B, logC, AB, AC	4	4.07437	2.71056	-0.108542	4.72627
Particle_size_nm	Random_Forest	B, sqrtC, C, logB	4	3.71622	2.47765	0.0777813	4.31081
Particle_size_nm	Random_Forest	B, sqrtC, C, C2	4	3.70933	2.46943	0.0811968	4.30282
Particle_size_nm	Random_Forest	B, sqrtC, C, AB	4	4.4579	3.00098	-0.327063	5.17116
Particle_size_nm	Random_Forest	B, sqrtC, C, AC	4	3.79693	2.58899	0.0372854	4.40444
Particle_size_nm	Random_Forest	B, sqrtC, logB, C2	4	3.72034	2.48882	0.0757328	4.3156
Particle_size_nm	Random_Forest	B, sqrtC, logB, AB	4	4.40963	2.8581	-0.298484	5.11517
Particle_size_nm	Random_Forest	B, sqrtC, logB, AC	4	3.76991	2.5332	0.0509424	4.37309
Particle_size_nm	Random_Forest	B, sqrtC, C2, AB	4	4.4579	3.00098	-0.327063	5.17116
Particle_size_nm	Random_Forest	B, sqrtC, C2, AC	4	3.79693	2.58899	0.0372854	4.40444
Particle_size_nm	Random_Forest	B, sqrtC, AB, AC	4	4.07437	2.71056	-0.108542	4.72627
Particle_size_nm	Random_Forest	B, C, logB, C2	4	3.71657	2.47844	0.0776056	4.31122
Particle_size_nm	Random_Forest	B, C, logB, AB	4	4.57173	3.20657	-0.395703	5.30321
Particle_size_nm	Random_Forest	B, C, logB, AC	4	3.79134	2.62378	0.0401222	4.39795
Particle_size_nm	Random_Forest	B, C, C2, AB	4	4.55743	3.18398	-0.386984	5.28662
Particle_size_nm	Random_Forest	B, C, C2, AC	4	3.82128	2.64901	0.0249007	4.43268
Particle_size_nm	Random_Forest	B, C, AB, AC	4	4.11177	2.80361	-0.128986	4.76965
Particle_size_nm	Random_Forest	B, logB, C2, AB	4	4.55612	3.19546	-0.386188	5.2851
Particle_size_nm	Random_Forest	B, logB, C2, AC	4	3.81148	2.62601	0.0298962	4.42131
Particle_size_nm	Random_Forest	B, logB, AB, AC	4	4.0173	2.79277	-0.0777041	4.66007
Particle_size_nm	Random_Forest	B, C2, AB, AC	4	4.11177	2.80361	-0.128986	4.76965
Particle_size_nm	Random_Forest	logC, sqrtC, C, logB	4	3.72008	2.467	0.0758642	4.31529
Particle_size_nm	Random_Forest	logC, sqrtC, C, C2	4	4.71074	3.3819	-0.481871	5.46446
Particle_size_nm	Random_Forest	logC, sqrtC, C, AB	4	5.40837	3.88824	-0.953281	6.27371
Particle_size_nm	Random_Forest	logC, sqrtC, C, AC	4	5.29388	3.94928	-0.871457	6.1409
Particle_size_nm	Random_Forest	logC, sqrtC, logB, C2	4	3.71707	2.45451	0.0773609	4.3118
Particle_size_nm	Random_Forest	logC, sqrtC, logB, AB	4	4.40936	2.84382	-0.298324	5.11486
Particle_size_nm	Random_Forest	logC, sqrtC, logB, AC	4	3.82564	2.54698	0.0226715	4.43775
Particle_size_nm	Random_Forest	logC, sqrtC, C2, AB	4	5.40837	3.88824	-0.953281	6.27371
Particle_size_nm	Random_Forest	logC, sqrtC, C2, AC	4	5.29388	3.94928	-0.871457	6.1409
Particle_size_nm	Random_Forest	logC, sqrtC, AB, AC	4	5.16845	3.79892	-0.783826	5.9954
Particle_size_nm	Random_Forest	logC, C, logB, C2	4	3.72431	2.48652	0.073761	4.3202
Particle_size_nm	Random_Forest	logC, C, logB, AB	4	4.46404	3.00419	-0.330721	5.17828
Particle_size_nm	Random_Forest	logC, C, logB, AC	4	3.84213	2.62228	0.0142288	4.45687
Particle_size_nm	Random_Forest	logC, C, C2, AB	4	5.46741	3.9868	-0.996155	6.34219
Particle_size_nm	Random_Forest	logC, C, C2, AC	4	5.29263	3.94823	-0.870572	6.13945
Particle_size_nm	Random_Forest	logC, C, AB, AC	4	5.17696	3.80624	-0.789702	6.00527
Particle_size_nm	Random_Forest	logC, logB, C2, AB	4	4.48236	3.02946	-0.341666	5.19953
Particle_size_nm	Random_Forest	logC, logB, C2, AC	4	3.85853	2.64836	0.00579693	4.47589
Particle_size_nm	Random_Forest	logC, logB, AB, AC	4	4.15974	2.79862	-0.155485	4.8253
Particle_size_nm	Random_Forest	logC, C2, AB, AC	4	5.17696	3.80624	-0.789702	6.00527
Particle_size_nm	Random_Forest	sqrtC, C, logB, C2	4	3.72431	2.48652	0.073761	4.3202
Particle_size_nm	Random_Forest	sqrtC, C, logB, AB	4	4.46404	3.00419	-0.330721	5.17828
Particle_size_nm	Random_Forest	sqrtC, C, logB, AC	4	3.84213	2.62228	0.0142288	4.45687
Particle_size_nm	Random_Forest	sqrtC, C, C2, AB	4	5.46741	3.9868	-0.996155	6.34219
Particle_size_nm	Random_Forest	sqrtC, C, C2, AC	4	5.29263	3.94823	-0.870572	6.13945
Particle_size_nm	Random_Forest	sqrtC, C, AB, AC	4	5.17696	3.80624	-0.789702	6.00527
Particle_size_nm	Random_Forest	sqrtC, logB, C2, AB	4	4.48236	3.02946	-0.341666	5.19953
Particle_size_nm	Random_Forest	sqrtC, logB, C2, AC	4	3.85853	2.64836	0.00579693	4.47589
Particle_size_nm	Random_Forest	sqrtC, logB, AB, AC	4	4.15974	2.79862	-0.155485	4.8253
Particle_size_nm	Random_Forest	sqrtC, C2, AB, AC	4	5.17696	3.80624	-0.789702	6.00527
Particle_size_nm	Random_Forest	C, logB, C2, AB	4	4.57764	3.18631	-0.39931	5.31006
Particle_size_nm	Random_Forest	C, logB, C2, AC	4	3.87616	2.69179	-0.00331012	4.49635
Particle_size_nm	Random_Forest	C, logB, AB, AC	4	4.18878	2.86941	-0.171671	4.85898
Particle_size_nm	Random_Forest	C, C2, AB, AC	4	5.19525	3.82253	-0.802369	6.02649
Particle_size_nm	Random_Forest	logB, C2, AB, AC	4	4.12032	2.80676	-0.133689	4.77957
Particle_size_nm	Gradient_Boosting	BC, B2	2	3.94734	2.73749	-0.0404962	4.26313
Particle_size_nm	Gradient_Boosting	BC, B	2	3.94734	2.73749	-0.0404962	4.26313
Particle_size_nm	Gradient_Boosting	BC, logC	2	4.52023	2.97765	-0.364433	4.88185
Particle_size_nm	Gradient_Boosting	BC, sqrtC	2	4.52023	2.97765	-0.364433	4.88185
Particle_size_nm	Gradient_Boosting	BC, C	2	4.52023	2.97765	-0.364433	4.88185
Particle_size_nm	Gradient_Boosting	BC, logB	2	3.94734	2.73749	-0.0404962	4.26313
Particle_size_nm	Gradient_Boosting	BC, C2	2	4.52023	2.97765	-0.364433	4.88185
Particle_size_nm	Gradient_Boosting	BC, AB	2	5.54435	4.07299	-1.05273	5.98789
Particle_size_nm	Gradient_Boosting	BC, AC	2	4.14686	2.82286	-0.148341	4.47861
Particle_size_nm	Gradient_Boosting	B2, B	2	3.56437	2.70515	0.151609	3.84952
Particle_size_nm	Gradient_Boosting	B2, logC	2	3.90167	2.63703	-0.0165599	4.21381
Particle_size_nm	Gradient_Boosting	B2, sqrtC	2	3.90167	2.63703	-0.0165599	4.21381
Particle_size_nm	Gradient_Boosting	B2, C	2	3.90167	2.63703	-0.0165599	4.21381
Particle_size_nm	Gradient_Boosting	B2, logB	2	3.56437	2.70515	0.151609	3.84952
Particle_size_nm	Gradient_Boosting	B2, C2	2	3.90167	2.63703	-0.0165599	4.21381
Particle_size_nm	Gradient_Boosting	B2, AB	2	5.00001	3.42235	-0.669448	5.40001
Particle_size_nm	Gradient_Boosting	B2, AC	2	4.14631	3.24401	-0.148034	4.47801
Particle_size_nm	Gradient_Boosting	B, logC	2	3.90167	2.63703	-0.0165599	4.21381
Particle_size_nm	Gradient_Boosting	B, sqrtC	2	3.90167	2.63703	-0.0165599	4.21381
Particle_size_nm	Gradient_Boosting	B, C	2	3.90167	2.63703	-0.0165599	4.21381
Particle_size_nm	Gradient_Boosting	B, logB	2	3.56437	2.70515	0.151609	3.84952
Particle_size_nm	Gradient_Boosting	B, C2	2	3.90167	2.63703	-0.0165599	4.21381
Particle_size_nm	Gradient_Boosting	B, AB	2	5.00001	3.42235	-0.669448	5.40001
Particle_size_nm	Gradient_Boosting	B, AC	2	4.14631	3.24401	-0.148034	4.47801
Particle_size_nm	Gradient_Boosting	logC, sqrtC	2	4.68389	3.3798	-0.465022	5.0586
Particle_size_nm	Gradient_Boosting	logC, C	2	4.68389	3.3798	-0.465022	5.0586
Particle_size_nm	Gradient_Boosting	logC, logB	2	3.90167	2.63703	-0.0165599	4.21381
Particle_size_nm	Gradient_Boosting	logC, C2	2	4.68389	3.3798	-0.465022	5.0586
Particle_size_nm	Gradient_Boosting	logC, AB	2	7.43015	5.58493	-2.6866	8.02456
Particle_size_nm	Gradient_Boosting	logC, AC	2	5.51218	4.16886	-1.02898	5.95315
Particle_size_nm	Gradient_Boosting	sqrtC, C	2	4.68389	3.3798	-0.465022	5.0586
Particle_size_nm	Gradient_Boosting	sqrtC, logB	2	3.90167	2.63703	-0.0165599	4.21381
Particle_size_nm	Gradient_Boosting	sqrtC, C2	2	4.68389	3.3798	-0.465022	5.0586
Particle_size_nm	Gradient_Boosting	sqrtC, AB	2	7.43015	5.58493	-2.6866	8.02456
Particle_size_nm	Gradient_Boosting	sqrtC, AC	2	5.51218	4.16886	-1.02898	5.95315
Particle_size_nm	Gradient_Boosting	C, logB	2	3.90167	2.63703	-0.0165599	4.21381
Particle_size_nm	Gradient_Boosting	C, C2	2	4.68389	3.3798	-0.465022	5.0586
Particle_size_nm	Gradient_Boosting	C, AB	2	7.32736	5.7147	-2.58531	7.91355
Particle_size_nm	Gradient_Boosting	C, AC	2	5.51218	4.16886	-1.02898	5.95315
Particle_size_nm	Gradient_Boosting	logB, C2	2	3.90167	2.63703	-0.0165599	4.21381
Particle_size_nm	Gradient_Boosting	logB, AB	2	5.00001	3.42235	-0.669448	5.40001
Particle_size_nm	Gradient_Boosting	logB, AC	2	4.29242	3.2135	-0.230369	4.63581
Particle_size_nm	Gradient_Boosting	C2, AB	2	7.32736	5.7147	-2.58531	7.91355
Particle_size_nm	Gradient_Boosting	C2, AC	2	5.51218	4.16886	-1.02898	5.95315
Particle_size_nm	Gradient_Boosting	AB, AC	2	5.99503	4.38781	-1.40002	6.47463
Particle_size_nm	Gradient_Boosting	BC, B2, B	3	3.94554	2.73666	-0.0395472	4.419
Particle_size_nm	Gradient_Boosting	BC, B2, logC	3	3.90649	2.63342	-0.0190709	4.37527
Particle_size_nm	Gradient_Boosting	BC, B2, sqrtC	3	3.90649	2.63342	-0.0190709	4.37527
Particle_size_nm	Gradient_Boosting	BC, B2, C	3	3.90649	2.63342	-0.0190709	4.37527
Particle_size_nm	Gradient_Boosting	BC, B2, logB	3	3.94554	2.73666	-0.0395472	4.419
Particle_size_nm	Gradient_Boosting	BC, B2, C2	3	3.90649	2.63342	-0.0190709	4.37527
Particle_size_nm	Gradient_Boosting	BC, B2, AB	3	5.47705	4.03993	-1.00321	6.1343
Particle_size_nm	Gradient_Boosting	BC, B2, AC	3	3.13821	2.19795	0.342348	3.5148
Particle_size_nm	Gradient_Boosting	BC, B, logC	3	3.90649	2.63342	-0.0190709	4.37527
Particle_size_nm	Gradient_Boosting	BC, B, sqrtC	3	3.90649	2.63342	-0.0190709	4.37527
Particle_size_nm	Gradient_Boosting	BC, B, C	3	3.90649	2.63342	-0.0190709	4.37527
Particle_size_nm	Gradient_Boosting	BC, B, logB	3	3.94554	2.73666	-0.0395472	4.419
Particle_size_nm	Gradient_Boosting	BC, B, C2	3	3.90649	2.63342	-0.0190709	4.37527
Particle_size_nm	Gradient_Boosting	BC, B, AB	3	5.47705	4.03993	-1.00321	6.1343
Particle_size_nm	Gradient_Boosting	BC, B, AC	3	3.13821	2.19795	0.342348	3.5148
Particle_size_nm	Gradient_Boosting	BC, logC, sqrtC	3	4.60696	3.11534	-0.417298	5.1598
Particle_size_nm	Gradient_Boosting	BC, logC, C	3	4.60696	3.11534	-0.417298	5.1598
Particle_size_nm	Gradient_Boosting	BC, logC, logB	3	3.90673	2.64682	-0.0191969	4.37554
Particle_size_nm	Gradient_Boosting	BC, logC, C2	3	4.60696	3.11534	-0.417298	5.1598
Particle_size_nm	Gradient_Boosting	BC, logC, AB	3	5.46276	3.96341	-0.992766	6.1183
Particle_size_nm	Gradient_Boosting	BC, logC, AC	3	4.08756	2.77108	-0.11573	4.57806
Particle_size_nm	Gradient_Boosting	BC, sqrtC, C	3	4.60696	3.11534	-0.417298	5.1598
Particle_size_nm	Gradient_Boosting	BC, sqrtC, logB	3	3.90673	2.64682	-0.0191969	4.37554
Particle_size_nm	Gradient_Boosting	BC, sqrtC, C2	3	4.60696	3.11534	-0.417298	5.1598
Particle_size_nm	Gradient_Boosting	BC, sqrtC, AB	3	5.46276	3.96341	-0.992766	6.1183
Particle_size_nm	Gradient_Boosting	BC, sqrtC, AC	3	4.08756	2.77108	-0.11573	4.57806
Particle_size_nm	Gradient_Boosting	BC, C, logB	3	3.90673	2.64682	-0.0191969	4.37554
Particle_size_nm	Gradient_Boosting	BC, C, C2	3	4.60696	3.11534	-0.417298	5.1598
Particle_size_nm	Gradient_Boosting	BC, C, AB	3	5.48904	3.98835	-1.01198	6.14772
Particle_size_nm	Gradient_Boosting	BC, C, AC	3	4.08756	2.77108	-0.11573	4.57806
Particle_size_nm	Gradient_Boosting	BC, logB, C2	3	3.90649	2.63342	-0.0190709	4.37527
Particle_size_nm	Gradient_Boosting	BC, logB, AB	3	5.47705	4.03993	-1.00321	6.1343
Particle_size_nm	Gradient_Boosting	BC, logB, AC	3	3.13802	2.1971	0.342428	3.51458
Particle_size_nm	Gradient_Boosting	BC, C2, AB	3	5.48904	3.98835	-1.01198	6.14772
Particle_size_nm	Gradient_Boosting	BC, C2, AC	3	4.08756	2.77108	-0.11573	4.57806
Particle_size_nm	Gradient_Boosting	BC, AB, AC	3	4.69691	3.30306	-0.473181	5.26054
Particle_size_nm	Gradient_Boosting	B2, B, logC	3	3.90167	2.63703	-0.0165599	4.36987
Particle_size_nm	Gradient_Boosting	B2, B, sqrtC	3	3.90167	2.63703	-0.0165599	4.36987
Particle_size_nm	Gradient_Boosting	B2, B, C	3	3.90167	2.63703	-0.0165599	4.36987
Particle_size_nm	Gradient_Boosting	B2, B, logB	3	3.56437	2.70515	0.151609	3.99209
Particle_size_nm	Gradient_Boosting	B2, B, C2	3	3.90167	2.63703	-0.0165599	4.36987
Particle_size_nm	Gradient_Boosting	B2, B, AB	3	4.9999	3.42204	-0.669378	5.59989
Particle_size_nm	Gradient_Boosting	B2, B, AC	3	4.14977	3.24938	-0.149953	4.64774
Particle_size_nm	Gradient_Boosting	B2, logC, sqrtC	3	3.90167	2.63703	-0.0165599	4.36987
Particle_size_nm	Gradient_Boosting	B2, logC, C	3	3.90167	2.63703	-0.0165599	4.36987
Particle_size_nm	Gradient_Boosting	B2, logC, logB	3	3.90167	2.63703	-0.0165599	4.36987
Particle_size_nm	Gradient_Boosting	B2, logC, C2	3	3.90167	2.63703	-0.0165599	4.36987
Particle_size_nm	Gradient_Boosting	B2, logC, AB	3	5.30195	3.83106	-0.877164	5.93818
Particle_size_nm	Gradient_Boosting	B2, logC, AC	3	3.33551	2.40509	0.257054	3.73578
Particle_size_nm	Gradient_Boosting	B2, sqrtC, C	3	3.90167	2.63703	-0.0165599	4.36987
Particle_size_nm	Gradient_Boosting	B2, sqrtC, logB	3	3.90167	2.63703	-0.0165599	4.36987
Particle_size_nm	Gradient_Boosting	B2, sqrtC, C2	3	3.90167	2.63703	-0.0165599	4.36987
Particle_size_nm	Gradient_Boosting	B2, sqrtC, AB	3	5.30195	3.83106	-0.877164	5.93818
Particle_size_nm	Gradient_Boosting	B2, sqrtC, AC	3	3.33551	2.40509	0.257054	3.73578
Particle_size_nm	Gradient_Boosting	B2, C, logB	3	3.90167	2.63703	-0.0165599	4.36987
Particle_size_nm	Gradient_Boosting	B2, C, C2	3	3.90167	2.63703	-0.0165599	4.36987
Particle_size_nm	Gradient_Boosting	B2, C, AB	3	5.20235	3.71503	-0.807303	5.82663
Particle_size_nm	Gradient_Boosting	B2, C, AC	3	3.33551	2.40509	0.257054	3.73578
Particle_size_nm	Gradient_Boosting	B2, logB, C2	3	3.90167	2.63703	-0.0165599	4.36987
Particle_size_nm	Gradient_Boosting	B2, logB, AB	3	4.9999	3.42204	-0.669378	5.59989
Particle_size_nm	Gradient_Boosting	B2, logB, AC	3	4.18825	3.22622	-0.171379	4.69084
Particle_size_nm	Gradient_Boosting	B2, C2, AB	3	5.20235	3.71503	-0.807303	5.82663
Particle_size_nm	Gradient_Boosting	B2, C2, AC	3	3.33551	2.40509	0.257054	3.73578
Particle_size_nm	Gradient_Boosting	B2, AB, AC	3	5.0404	3.48986	-0.696531	5.64525
Particle_size_nm	Gradient_Boosting	B, logC, sqrtC	3	3.90167	2.63703	-0.0165599	4.36987
Particle_size_nm	Gradient_Boosting	B, logC, C	3	3.90167	2.63703	-0.0165599	4.36987
Particle_size_nm	Gradient_Boosting	B, logC, logB	3	3.90167	2.63703	-0.0165599	4.36987
Particle_size_nm	Gradient_Boosting	B, logC, C2	3	3.90167	2.63703	-0.0165599	4.36987
Particle_size_nm	Gradient_Boosting	B, logC, AB	3	5.30195	3.83106	-0.877164	5.93818
Particle_size_nm	Gradient_Boosting	B, logC, AC	3	3.33551	2.40509	0.257054	3.73578
Particle_size_nm	Gradient_Boosting	B, sqrtC, C	3	3.90167	2.63703	-0.0165599	4.36987
Particle_size_nm	Gradient_Boosting	B, sqrtC, logB	3	3.90167	2.63703	-0.0165599	4.36987
Particle_size_nm	Gradient_Boosting	B, sqrtC, C2	3	3.90167	2.63703	-0.0165599	4.36987
Particle_size_nm	Gradient_Boosting	B, sqrtC, AB	3	5.30195	3.83106	-0.877164	5.93818
Particle_size_nm	Gradient_Boosting	B, sqrtC, AC	3	3.33551	2.40509	0.257054	3.73578
Particle_size_nm	Gradient_Boosting	B, C, logB	3	3.90167	2.63703	-0.0165599	4.36987
Particle_size_nm	Gradient_Boosting	B, C, C2	3	3.90167	2.63703	-0.0165599	4.36987
Particle_size_nm	Gradient_Boosting	B, C, AB	3	5.20235	3.71503	-0.807303	5.82663
Particle_size_nm	Gradient_Boosting	B, C, AC	3	3.33551	2.40509	0.257054	3.73578
Particle_size_nm	Gradient_Boosting	B, logB, C2	3	3.90167	2.63703	-0.0165599	4.36987
Particle_size_nm	Gradient_Boosting	B, logB, AB	3	4.9999	3.42204	-0.669378	5.59989
Particle_size_nm	Gradient_Boosting	B, logB, AC	3	4.18825	3.22622	-0.171379	4.69084
Particle_size_nm	Gradient_Boosting	B, C2, AB	3	5.20235	3.71503	-0.807303	5.82663
Particle_size_nm	Gradient_Boosting	B, C2, AC	3	3.33551	2.40509	0.257054	3.73578
Particle_size_nm	Gradient_Boosting	B, AB, AC	3	5.0404	3.48986	-0.696531	5.64525
Particle_size_nm	Gradient_Boosting	logC, sqrtC, C	3	4.68389	3.3798	-0.465022	5.24595
Particle_size_nm	Gradient_Boosting	logC, sqrtC, logB	3	3.90167	2.63703	-0.0165599	4.36987
Particle_size_nm	Gradient_Boosting	logC, sqrtC, C2	3	4.68389	3.3798	-0.465022	5.24595
Particle_size_nm	Gradient_Boosting	logC, sqrtC, AB	3	7.35774	5.46183	-2.6151	8.24067
Particle_size_nm	Gradient_Boosting	logC, sqrtC, AC	3	5.53374	4.18438	-1.04489	6.19779
Particle_size_nm	Gradient_Boosting	logC, C, logB	3	3.90167	2.63703	-0.0165599	4.36987
Particle_size_nm	Gradient_Boosting	logC, C, C2	3	4.68389	3.3798	-0.465022	5.24595
Particle_size_nm	Gradient_Boosting	logC, C, AB	3	7.20608	5.48214	-2.46761	8.07081
Particle_size_nm	Gradient_Boosting	logC, C, AC	3	5.53374	4.18438	-1.04489	6.19779
Particle_size_nm	Gradient_Boosting	logC, logB, C2	3	3.90167	2.63703	-0.0165599	4.36987
Particle_size_nm	Gradient_Boosting	logC, logB, AB	3	5.30933	3.86967	-0.882394	5.94645
Particle_size_nm	Gradient_Boosting	logC, logB, AC	3	3.56634	2.63021	0.150668	3.9943
Particle_size_nm	Gradient_Boosting	logC, C2, AB	3	7.20608	5.48214	-2.46761	8.07081
Particle_size_nm	Gradient_Boosting	logC, C2, AC	3	5.53374	4.18438	-1.04489	6.19779
Particle_size_nm	Gradient_Boosting	logC, AB, AC	3	6.99591	5.24056	-2.26828	7.83542
Particle_size_nm	Gradient_Boosting	sqrtC, C, logB	3	3.90167	2.63703	-0.0165599	4.36987
Particle_size_nm	Gradient_Boosting	sqrtC, C, C2	3	4.68389	3.3798	-0.465022	5.24595
Particle_size_nm	Gradient_Boosting	sqrtC, C, AB	3	7.20608	5.48214	-2.46761	8.07081
Particle_size_nm	Gradient_Boosting	sqrtC, C, AC	3	5.53374	4.18438	-1.04489	6.19779
Particle_size_nm	Gradient_Boosting	sqrtC, logB, C2	3	3.90167	2.63703	-0.0165599	4.36987
Particle_size_nm	Gradient_Boosting	sqrtC, logB, AB	3	5.30933	3.86967	-0.882394	5.94645
Particle_size_nm	Gradient_Boosting	sqrtC, logB, AC	3	3.56634	2.63021	0.150668	3.9943
Particle_size_nm	Gradient_Boosting	sqrtC, C2, AB	3	7.20608	5.48214	-2.46761	8.07081
Particle_size_nm	Gradient_Boosting	sqrtC, C2, AC	3	5.53374	4.18438	-1.04489	6.19779
Particle_size_nm	Gradient_Boosting	sqrtC, AB, AC	3	6.99591	5.24056	-2.26828	7.83542
Particle_size_nm	Gradient_Boosting	C, logB, C2	3	3.90167	2.63703	-0.0165599	4.36987
Particle_size_nm	Gradient_Boosting	C, logB, AB	3	5.20987	3.75364	-0.812532	5.83506
Particle_size_nm	Gradient_Boosting	C, logB, AC	3	3.56634	2.63021	0.150668	3.9943
Particle_size_nm	Gradient_Boosting	C, C2, AB	3	7.25393	5.5916	-2.51381	8.1244
Particle_size_nm	Gradient_Boosting	C, C2, AC	3	5.53374	4.18438	-1.04489	6.19779
Particle_size_nm	Gradient_Boosting	C, AB, AC	3	7.00563	5.23621	-2.27737	7.8463
Particle_size_nm	Gradient_Boosting	logB, C2, AB	3	5.20235	3.71503	-0.807303	5.82663
Particle_size_nm	Gradient_Boosting	logB, C2, AC	3	3.52497	2.52905	0.170258	3.94797
Particle_size_nm	Gradient_Boosting	logB, AB, AC	3	5.04119	3.495	-0.697061	5.64613
Particle_size_nm	Gradient_Boosting	C2, AB, AC	3	7.00563	5.23621	-2.27737	7.8463
Particle_size_nm	Gradient_Boosting	BC, B2, B, logC	4	3.91481	2.66966	-0.0234152	4.54117
Particle_size_nm	Gradient_Boosting	BC, B2, B, sqrtC	4	3.91481	2.66966	-0.0234152	4.54117
Particle_size_nm	Gradient_Boosting	BC, B2, B, C	4	3.91481	2.66966	-0.0234152	4.54117
Particle_size_nm	Gradient_Boosting	BC, B2, B, logB	4	3.94541	2.7366	-0.039477	4.57667
Particle_size_nm	Gradient_Boosting	BC, B2, B, C2	4	3.91481	2.66966	-0.0234152	4.54117
Particle_size_nm	Gradient_Boosting	BC, B2, B, AB	4	5.41003	3.98464	-0.954476	6.27563
Particle_size_nm	Gradient_Boosting	BC, B2, B, AC	4	3.1266	2.14078	0.347207	3.62685
Particle_size_nm	Gradient_Boosting	BC, B2, logC, sqrtC	4	3.90648	2.63143	-0.0190673	4.53152
Particle_size_nm	Gradient_Boosting	BC, B2, logC, C	4	3.90648	2.63143	-0.0190673	4.53152
Particle_size_nm	Gradient_Boosting	BC, B2, logC, logB	4	3.90646	2.63617	-0.0190578	4.5315
Particle_size_nm	Gradient_Boosting	BC, B2, logC, C2	4	3.90648	2.63143	-0.0190673	4.53152
Particle_size_nm	Gradient_Boosting	BC, B2, logC, AB	4	5.23355	3.76917	-0.829045	6.07092
Particle_size_nm	Gradient_Boosting	BC, B2, logC, AC	4	2.96438	2.02122	0.413189	3.43868
Particle_size_nm	Gradient_Boosting	BC, B2, sqrtC, C	4	3.90648	2.63143	-0.0190673	4.53152
Particle_size_nm	Gradient_Boosting	BC, B2, sqrtC, logB	4	3.90646	2.63617	-0.0190578	4.5315
Particle_size_nm	Gradient_Boosting	BC, B2, sqrtC, C2	4	3.90648	2.63143	-0.0190673	4.53152
Particle_size_nm	Gradient_Boosting	BC, B2, sqrtC, AB	4	5.23355	3.76917	-0.829045	6.07092
Particle_size_nm	Gradient_Boosting	BC, B2, sqrtC, AC	4	2.96438	2.02122	0.413189	3.43868
Particle_size_nm	Gradient_Boosting	BC, B2, C, logB	4	3.90646	2.63617	-0.0190578	4.5315
Particle_size_nm	Gradient_Boosting	BC, B2, C, C2	4	3.90648	2.63143	-0.0190673	4.53152
Particle_size_nm	Gradient_Boosting	BC, B2, C, AB	4	5.22935	3.76554	-0.82611	6.06605
Particle_size_nm	Gradient_Boosting	BC, B2, C, AC	4	2.96438	2.02122	0.413189	3.43868
Particle_size_nm	Gradient_Boosting	BC, B2, logB, C2	4	3.91481	2.66966	-0.0234152	4.54117
Particle_size_nm	Gradient_Boosting	BC, B2, logB, AB	4	5.41003	3.98464	-0.954476	6.27563
Particle_size_nm	Gradient_Boosting	BC, B2, logB, AC	4	3.12734	2.14059	0.346896	3.62772
Particle_size_nm	Gradient_Boosting	BC, B2, C2, AB	4	5.22935	3.76554	-0.82611	6.06605
Particle_size_nm	Gradient_Boosting	BC, B2, C2, AC	4	2.96438	2.02122	0.413189	3.43868
Particle_size_nm	Gradient_Boosting	BC, B2, AB, AC	4	3.80841	2.70185	0.0314586	4.41775
Particle_size_nm	Gradient_Boosting	BC, B, logC, sqrtC	4	3.90648	2.63143	-0.0190673	4.53152
Particle_size_nm	Gradient_Boosting	BC, B, logC, C	4	3.90648	2.63143	-0.0190673	4.53152
Particle_size_nm	Gradient_Boosting	BC, B, logC, logB	4	3.90646	2.63617	-0.0190578	4.5315
Particle_size_nm	Gradient_Boosting	BC, B, logC, C2	4	3.90648	2.63143	-0.0190673	4.53152
Particle_size_nm	Gradient_Boosting	BC, B, logC, AB	4	5.23355	3.76917	-0.829045	6.07092
Particle_size_nm	Gradient_Boosting	BC, B, logC, AC	4	2.96438	2.02122	0.413189	3.43868
Particle_size_nm	Gradient_Boosting	BC, B, sqrtC, C	4	3.90648	2.63143	-0.0190673	4.53152
Particle_size_nm	Gradient_Boosting	BC, B, sqrtC, logB	4	3.90646	2.63617	-0.0190578	4.5315
Particle_size_nm	Gradient_Boosting	BC, B, sqrtC, C2	4	3.90648	2.63143	-0.0190673	4.53152
Particle_size_nm	Gradient_Boosting	BC, B, sqrtC, AB	4	5.23355	3.76917	-0.829045	6.07092
Particle_size_nm	Gradient_Boosting	BC, B, sqrtC, AC	4	2.96438	2.02122	0.413189	3.43868
Particle_size_nm	Gradient_Boosting	BC, B, C, logB	4	3.90646	2.63617	-0.0190578	4.5315
Particle_size_nm	Gradient_Boosting	BC, B, C, C2	4	3.90648	2.63143	-0.0190673	4.53152
Particle_size_nm	Gradient_Boosting	BC, B, C, AB	4	5.22935	3.76554	-0.82611	6.06605
Particle_size_nm	Gradient_Boosting	BC, B, C, AC	4	2.96438	2.02122	0.413189	3.43868
Particle_size_nm	Gradient_Boosting	BC, B, logB, C2	4	3.91481	2.66966	-0.0234152	4.54117
Particle_size_nm	Gradient_Boosting	BC, B, logB, AB	4	5.41003	3.98464	-0.954476	6.27563
Particle_size_nm	Gradient_Boosting	BC, B, logB, AC	4	3.12734	2.14059	0.346896	3.62772
Particle_size_nm	Gradient_Boosting	BC, B, C2, AB	4	5.22935	3.76554	-0.82611	6.06605
Particle_size_nm	Gradient_Boosting	BC, B, C2, AC	4	2.96438	2.02122	0.413189	3.43868
Particle_size_nm	Gradient_Boosting	BC, B, AB, AC	4	3.80841	2.70185	0.0314586	4.41775
Particle_size_nm	Gradient_Boosting	BC, logC, sqrtC, C	4	4.60329	3.11407	-0.415035	5.33981
Particle_size_nm	Gradient_Boosting	BC, logC, sqrtC, logB	4	3.90801	2.64499	-0.0198667	4.53329
Particle_size_nm	Gradient_Boosting	BC, logC, sqrtC, C2	4	4.60329	3.11407	-0.415035	5.33981
Particle_size_nm	Gradient_Boosting	BC, logC, sqrtC, AB	4	5.39738	3.94114	-0.945347	6.26096
Particle_size_nm	Gradient_Boosting	BC, logC, sqrtC, AC	4	4.06656	2.77048	-0.104296	4.71721
Particle_size_nm	Gradient_Boosting	BC, logC, C, logB	4	3.90801	2.64499	-0.0198667	4.53329
Particle_size_nm	Gradient_Boosting	BC, logC, C, C2	4	4.60329	3.11407	-0.415035	5.33981
Particle_size_nm	Gradient_Boosting	BC, logC, C, AB	4	5.42398	3.97518	-0.964568	6.29181
Particle_size_nm	Gradient_Boosting	BC, logC, C, AC	4	4.06656	2.77048	-0.104296	4.71721
Particle_size_nm	Gradient_Boosting	BC, logC, logB, C2	4	3.91336	2.66933	-0.0226573	4.53949
Particle_size_nm	Gradient_Boosting	BC, logC, logB, AB	4	5.14936	3.65716	-0.770672	5.97326
Particle_size_nm	Gradient_Boosting	BC, logC, logB, AC	4	2.9787	2.04178	0.407506	3.45529
Particle_size_nm	Gradient_Boosting	BC, logC, C2, AB	4	5.42398	3.97518	-0.964568	6.29181
Particle_size_nm	Gradient_Boosting	BC, logC, C2, AC	4	4.06656	2.77048	-0.104296	4.71721
Particle_size_nm	Gradient_Boosting	BC, logC, AB, AC	4	4.57619	3.19738	-0.398428	5.30838
Particle_size_nm	Gradient_Boosting	BC, sqrtC, C, logB	4	3.90801	2.64499	-0.0198667	4.53329
Particle_size_nm	Gradient_Boosting	BC, sqrtC, C, C2	4	4.60329	3.11407	-0.415035	5.33981
Particle_size_nm	Gradient_Boosting	BC, sqrtC, C, AB	4	5.42398	3.97518	-0.964568	6.29181
Particle_size_nm	Gradient_Boosting	BC, sqrtC, C, AC	4	4.06656	2.77048	-0.104296	4.71721
Particle_size_nm	Gradient_Boosting	BC, sqrtC, logB, C2	4	3.91336	2.66933	-0.0226573	4.53949
Particle_size_nm	Gradient_Boosting	BC, sqrtC, logB, AB	4	5.14936	3.65716	-0.770672	5.97326
Particle_size_nm	Gradient_Boosting	BC, sqrtC, logB, AC	4	2.9787	2.04178	0.407506	3.45529
Particle_size_nm	Gradient_Boosting	BC, sqrtC, C2, AB	4	5.42398	3.97518	-0.964568	6.29181
Particle_size_nm	Gradient_Boosting	BC, sqrtC, C2, AC	4	4.06656	2.77048	-0.104296	4.71721
Particle_size_nm	Gradient_Boosting	BC, sqrtC, AB, AC	4	4.57619	3.19738	-0.398428	5.30838
Particle_size_nm	Gradient_Boosting	BC, C, logB, C2	4	3.91336	2.66933	-0.0226573	4.53949
Particle_size_nm	Gradient_Boosting	BC, C, logB, AB	4	5.14398	3.65258	-0.766976	5.96702
Particle_size_nm	Gradient_Boosting	BC, C, logB, AC	4	2.9787	2.04178	0.407506	3.45529
Particle_size_nm	Gradient_Boosting	BC, C, C2, AB	4	5.51776	4.06374	-1.03309	6.4006
Particle_size_nm	Gradient_Boosting	BC, C, C2, AC	4	4.06656	2.77048	-0.104296	4.71721
Particle_size_nm	Gradient_Boosting	BC, C, AB, AC	4	4.55758	3.1822	-0.387075	5.28679
Particle_size_nm	Gradient_Boosting	BC, logB, C2, AB	4	5.22935	3.76554	-0.82611	6.06605
Particle_size_nm	Gradient_Boosting	BC, logB, C2, AC	4	2.97705	2.02668	0.408162	3.45337
Particle_size_nm	Gradient_Boosting	BC, logB, AB, AC	4	3.80864	2.70198	0.0313392	4.41802
Particle_size_nm	Gradient_Boosting	BC, C2, AB, AC	4	4.55758	3.1822	-0.387075	5.28679
Particle_size_nm	Gradient_Boosting	B2, B, logC, sqrtC	4	3.90167	2.63703	-0.0165599	4.52594
Particle_size_nm	Gradient_Boosting	B2, B, logC, C	4	3.90167	2.63703	-0.0165599	4.52594
Particle_size_nm	Gradient_Boosting	B2, B, logC, logB	4	3.90167	2.63703	-0.0165599	4.52594
Particle_size_nm	Gradient_Boosting	B2, B, logC, C2	4	3.90167	2.63703	-0.0165599	4.52594
Particle_size_nm	Gradient_Boosting	B2, B, logC, AB	4	5.30979	3.86399	-0.882721	6.15935
Particle_size_nm	Gradient_Boosting	B2, B, logC, AC	4	3.42292	2.58085	0.217607	3.97059
Particle_size_nm	Gradient_Boosting	B2, B, sqrtC, C	4	3.90167	2.63703	-0.0165599	4.52594
Particle_size_nm	Gradient_Boosting	B2, B, sqrtC, logB	4	3.90167	2.63703	-0.0165599	4.52594
Particle_size_nm	Gradient_Boosting	B2, B, sqrtC, C2	4	3.90167	2.63703	-0.0165599	4.52594
Particle_size_nm	Gradient_Boosting	B2, B, sqrtC, AB	4	5.30979	3.86399	-0.882721	6.15935
Particle_size_nm	Gradient_Boosting	B2, B, sqrtC, AC	4	3.42292	2.58085	0.217607	3.97059
Particle_size_nm	Gradient_Boosting	B2, B, C, logB	4	3.90167	2.63703	-0.0165599	4.52594
Particle_size_nm	Gradient_Boosting	B2, B, C, C2	4	3.90167	2.63703	-0.0165599	4.52594
Particle_size_nm	Gradient_Boosting	B2, B, C, AB	4	5.21034	3.74796	-0.81286	6.044
Particle_size_nm	Gradient_Boosting	B2, B, C, AC	4	3.42292	2.58085	0.217607	3.97059
Particle_size_nm	Gradient_Boosting	B2, B, logB, C2	4	3.90167	2.63703	-0.0165599	4.52594
Particle_size_nm	Gradient_Boosting	B2, B, logB, AB	4	4.99968	3.42138	-0.669228	5.79963
Particle_size_nm	Gradient_Boosting	B2, B, logB, AC	4	4.16963	3.23279	-0.160986	4.83677
Particle_size_nm	Gradient_Boosting	B2, B, C2, AB	4	5.21034	3.74796	-0.81286	6.044
Particle_size_nm	Gradient_Boosting	B2, B, C2, AC	4	3.42292	2.58085	0.217607	3.97059
Particle_size_nm	Gradient_Boosting	B2, B, AB, AC	4	5.02504	3.4795	-0.686206	5.82905
Particle_size_nm	Gradient_Boosting	B2, logC, sqrtC, C	4	3.90167	2.63703	-0.0165599	4.52594
Particle_size_nm	Gradient_Boosting	B2, logC, sqrtC, logB	4	3.90167	2.63703	-0.0165599	4.52594
Particle_size_nm	Gradient_Boosting	B2, logC, sqrtC, C2	4	3.90167	2.63703	-0.0165599	4.52594
Particle_size_nm	Gradient_Boosting	B2, logC, sqrtC, AB	4	5.29976	3.81013	-0.875616	6.14772
Particle_size_nm	Gradient_Boosting	B2, logC, sqrtC, AC	4	3.36073	2.44562	0.245778	3.89845
Particle_size_nm	Gradient_Boosting	B2, logC, C, logB	4	3.90167	2.63703	-0.0165599	4.52594
Particle_size_nm	Gradient_Boosting	B2, logC, C, C2	4	3.90167	2.63703	-0.0165599	4.52594
Particle_size_nm	Gradient_Boosting	B2, logC, C, AB	4	5.25639	3.76537	-0.845045	6.09741
Particle_size_nm	Gradient_Boosting	B2, logC, C, AC	4	3.36073	2.44562	0.245778	3.89845
Particle_size_nm	Gradient_Boosting	B2, logC, logB, C2	4	3.90167	2.63703	-0.0165599	4.52594
Particle_size_nm	Gradient_Boosting	B2, logC, logB, AB	4	5.31087	3.87055	-0.883489	6.16061
Particle_size_nm	Gradient_Boosting	B2, logC, logB, AC	4	3.46169	2.57317	0.199783	4.01556
Particle_size_nm	Gradient_Boosting	B2, logC, C2, AB	4	5.25639	3.76537	-0.845045	6.09741
Particle_size_nm	Gradient_Boosting	B2, logC, C2, AC	4	3.36073	2.44562	0.245778	3.89845
Particle_size_nm	Gradient_Boosting	B2, logC, AB, AC	4	4.66901	3.3908	-0.455733	5.41606
Particle_size_nm	Gradient_Boosting	B2, sqrtC, C, logB	4	3.90167	2.63703	-0.0165599	4.52594
Particle_size_nm	Gradient_Boosting	B2, sqrtC, C, C2	4	3.90167	2.63703	-0.0165599	4.52594
Particle_size_nm	Gradient_Boosting	B2, sqrtC, C, AB	4	5.25639	3.76537	-0.845045	6.09741
Particle_size_nm	Gradient_Boosting	B2, sqrtC, C, AC	4	3.36073	2.44562	0.245778	3.89845
Particle_size_nm	Gradient_Boosting	B2, sqrtC, logB, C2	4	3.90167	2.63703	-0.0165599	4.52594
Particle_size_nm	Gradient_Boosting	B2, sqrtC, logB, AB	4	5.31087	3.87055	-0.883489	6.16061
Particle_size_nm	Gradient_Boosting	B2, sqrtC, logB, AC	4	3.46169	2.57317	0.199783	4.01556
Particle_size_nm	Gradient_Boosting	B2, sqrtC, C2, AB	4	5.25639	3.76537	-0.845045	6.09741
Particle_size_nm	Gradient_Boosting	B2, sqrtC, C2, AC	4	3.36073	2.44562	0.245778	3.89845
Particle_size_nm	Gradient_Boosting	B2, sqrtC, AB, AC	4	4.66901	3.3908	-0.455733	5.41606
Particle_size_nm	Gradient_Boosting	B2, C, logB, C2	4	3.90167	2.63703	-0.0165599	4.52594
Particle_size_nm	Gradient_Boosting	B2, C, logB, AB	4	5.21145	3.75453	-0.813627	6.04528
Particle_size_nm	Gradient_Boosting	B2, C, logB, AC	4	3.46169	2.57317	0.199783	4.01556
Particle_size_nm	Gradient_Boosting	B2, C, C2, AB	4	5.20012	3.6941	-0.805755	6.03214
Particle_size_nm	Gradient_Boosting	B2, C, C2, AC	4	3.36073	2.44562	0.245778	3.89845
Particle_size_nm	Gradient_Boosting	B2, C, AB, AC	4	4.6798	3.39796	-0.46247	5.42857
Particle_size_nm	Gradient_Boosting	B2, logB, C2, AB	4	5.21034	3.74796	-0.81286	6.044
Particle_size_nm	Gradient_Boosting	B2, logB, C2, AC	4	3.48714	2.62476	0.187975	4.04508
Particle_size_nm	Gradient_Boosting	B2, logB, AB, AC	4	5.02571	3.48359	-0.686657	5.82983
Particle_size_nm	Gradient_Boosting	B2, C2, AB, AC	4	4.6798	3.39796	-0.46247	5.42857
Particle_size_nm	Gradient_Boosting	B, logC, sqrtC, C	4	3.90167	2.63703	-0.0165599	4.52594
Particle_size_nm	Gradient_Boosting	B, logC, sqrtC, logB	4	3.90167	2.63703	-0.0165599	4.52594
Particle_size_nm	Gradient_Boosting	B, logC, sqrtC, C2	4	3.90167	2.63703	-0.0165599	4.52594
Particle_size_nm	Gradient_Boosting	B, logC, sqrtC, AB	4	5.29976	3.81013	-0.875616	6.14772
Particle_size_nm	Gradient_Boosting	B, logC, sqrtC, AC	4	3.36073	2.44562	0.245778	3.89845
Particle_size_nm	Gradient_Boosting	B, logC, C, logB	4	3.90167	2.63703	-0.0165599	4.52594
Particle_size_nm	Gradient_Boosting	B, logC, C, C2	4	3.90167	2.63703	-0.0165599	4.52594
Particle_size_nm	Gradient_Boosting	B, logC, C, AB	4	5.25639	3.76537	-0.845045	6.09741
Particle_size_nm	Gradient_Boosting	B, logC, C, AC	4	3.36073	2.44562	0.245778	3.89845
Particle_size_nm	Gradient_Boosting	B, logC, logB, C2	4	3.90167	2.63703	-0.0165599	4.52594
Particle_size_nm	Gradient_Boosting	B, logC, logB, AB	4	5.31087	3.87055	-0.883489	6.16061
Particle_size_nm	Gradient_Boosting	B, logC, logB, AC	4	3.46169	2.57317	0.199783	4.01556
Particle_size_nm	Gradient_Boosting	B, logC, C2, AB	4	5.25639	3.76537	-0.845045	6.09741
Particle_size_nm	Gradient_Boosting	B, logC, C2, AC	4	3.36073	2.44562	0.245778	3.89845
Particle_size_nm	Gradient_Boosting	B, logC, AB, AC	4	4.66901	3.3908	-0.455733	5.41606
Particle_size_nm	Gradient_Boosting	B, sqrtC, C, logB	4	3.90167	2.63703	-0.0165599	4.52594
Particle_size_nm	Gradient_Boosting	B, sqrtC, C, C2	4	3.90167	2.63703	-0.0165599	4.52594
Particle_size_nm	Gradient_Boosting	B, sqrtC, C, AB	4	5.25639	3.76537	-0.845045	6.09741
Particle_size_nm	Gradient_Boosting	B, sqrtC, C, AC	4	3.36073	2.44562	0.245778	3.89845
Particle_size_nm	Gradient_Boosting	B, sqrtC, logB, C2	4	3.90167	2.63703	-0.0165599	4.52594
Particle_size_nm	Gradient_Boosting	B, sqrtC, logB, AB	4	5.31087	3.87055	-0.883489	6.16061
Particle_size_nm	Gradient_Boosting	B, sqrtC, logB, AC	4	3.46169	2.57317	0.199783	4.01556
Particle_size_nm	Gradient_Boosting	B, sqrtC, C2, AB	4	5.25639	3.76537	-0.845045	6.09741
Particle_size_nm	Gradient_Boosting	B, sqrtC, C2, AC	4	3.36073	2.44562	0.245778	3.89845
Particle_size_nm	Gradient_Boosting	B, sqrtC, AB, AC	4	4.66901	3.3908	-0.455733	5.41606
Particle_size_nm	Gradient_Boosting	B, C, logB, C2	4	3.90167	2.63703	-0.0165599	4.52594
Particle_size_nm	Gradient_Boosting	B, C, logB, AB	4	5.21145	3.75453	-0.813627	6.04528
Particle_size_nm	Gradient_Boosting	B, C, logB, AC	4	3.46169	2.57317	0.199783	4.01556
Particle_size_nm	Gradient_Boosting	B, C, C2, AB	4	5.20012	3.6941	-0.805755	6.03214
Particle_size_nm	Gradient_Boosting	B, C, C2, AC	4	3.36073	2.44562	0.245778	3.89845
Particle_size_nm	Gradient_Boosting	B, C, AB, AC	4	4.6798	3.39796	-0.46247	5.42857
Particle_size_nm	Gradient_Boosting	B, logB, C2, AB	4	5.21034	3.74796	-0.81286	6.044
Particle_size_nm	Gradient_Boosting	B, logB, C2, AC	4	3.48714	2.62476	0.187975	4.04508
Particle_size_nm	Gradient_Boosting	B, logB, AB, AC	4	5.02571	3.48359	-0.686657	5.82983
Particle_size_nm	Gradient_Boosting	B, C2, AB, AC	4	4.6798	3.39796	-0.46247	5.42857
Particle_size_nm	Gradient_Boosting	logC, sqrtC, C, logB	4	3.90167	2.63703	-0.0165599	4.52594
Particle_size_nm	Gradient_Boosting	logC, sqrtC, C, C2	4	4.68389	3.3798	-0.465022	5.43331
Particle_size_nm	Gradient_Boosting	logC, sqrtC, C, AB	4	7.28501	5.45923	-2.54399	8.45062
Particle_size_nm	Gradient_Boosting	logC, sqrtC, C, AC	4	5.56343	4.20502	-1.06689	6.45358
Particle_size_nm	Gradient_Boosting	logC, sqrtC, logB, C2	4	3.90167	2.63703	-0.0165599	4.52594
Particle_size_nm	Gradient_Boosting	logC, sqrtC, logB, AB	4	5.29927	3.81224	-0.875268	6.14715
Particle_size_nm	Gradient_Boosting	logC, sqrtC, logB, AC	4	3.54684	2.53571	0.15993	4.11434
Particle_size_nm	Gradient_Boosting	logC, sqrtC, C2, AB	4	7.28501	5.45923	-2.54399	8.45062
Particle_size_nm	Gradient_Boosting	logC, sqrtC, C2, AC	4	5.56343	4.20502	-1.06689	6.45358
Particle_size_nm	Gradient_Boosting	logC, sqrtC, AB, AC	4	6.94416	5.19	-2.22012	8.05523
Particle_size_nm	Gradient_Boosting	logC, C, logB, C2	4	3.90167	2.63703	-0.0165599	4.52594
Particle_size_nm	Gradient_Boosting	logC, C, logB, AB	4	5.24551	3.75571	-0.837413	6.08479
Particle_size_nm	Gradient_Boosting	logC, C, logB, AC	4	3.54684	2.53571	0.15993	4.11434
Particle_size_nm	Gradient_Boosting	logC, C, C2, AB	4	7.25322	5.52327	-2.51313	8.41374
Particle_size_nm	Gradient_Boosting	logC, C, C2, AC	4	5.56343	4.20502	-1.06689	6.45358
Particle_size_nm	Gradient_Boosting	logC, C, AB, AC	4	6.94383	5.17888	-2.21981	8.05485
Particle_size_nm	Gradient_Boosting	logC, logB, C2, AB	4	5.25135	3.75556	-0.84151	6.09157
Particle_size_nm	Gradient_Boosting	logC, logB, C2, AC	4	3.55055	2.53806	0.158173	4.11864
Particle_size_nm	Gradient_Boosting	logC, logB, AB, AC	4	4.70882	3.44438	-0.480659	5.46223
Particle_size_nm	Gradient_Boosting	logC, C2, AB, AC	4	6.94383	5.17888	-2.21981	8.05485
Particle_size_nm	Gradient_Boosting	sqrtC, C, logB, C2	4	3.90167	2.63703	-0.0165599	4.52594
Particle_size_nm	Gradient_Boosting	sqrtC, C, logB, AB	4	5.24551	3.75571	-0.837413	6.08479
Particle_size_nm	Gradient_Boosting	sqrtC, C, logB, AC	4	3.54684	2.53571	0.15993	4.11434
Particle_size_nm	Gradient_Boosting	sqrtC, C, C2, AB	4	7.25322	5.52327	-2.51313	8.41374
Particle_size_nm	Gradient_Boosting	sqrtC, C, C2, AC	4	5.56343	4.20502	-1.06689	6.45358
Particle_size_nm	Gradient_Boosting	sqrtC, C, AB, AC	4	6.94383	5.17888	-2.21981	8.05485
Particle_size_nm	Gradient_Boosting	sqrtC, logB, C2, AB	4	5.25135	3.75556	-0.84151	6.09157
Particle_size_nm	Gradient_Boosting	sqrtC, logB, C2, AC	4	3.55055	2.53806	0.158173	4.11864
Particle_size_nm	Gradient_Boosting	sqrtC, logB, AB, AC	4	4.70882	3.44438	-0.480659	5.46223
Particle_size_nm	Gradient_Boosting	sqrtC, C2, AB, AC	4	6.94383	5.17888	-2.21981	8.05485
Particle_size_nm	Gradient_Boosting	C, logB, C2, AB	4	5.19986	3.68965	-0.805569	6.03183
Particle_size_nm	Gradient_Boosting	C, logB, C2, AC	4	3.55055	2.53806	0.158173	4.11864
Particle_size_nm	Gradient_Boosting	C, logB, AB, AC	4	4.72076	3.4543	-0.488178	5.47608
Particle_size_nm	Gradient_Boosting	C, C2, AB, AC	4	6.93812	5.15365	-2.21451	8.04822
Particle_size_nm	Gradient_Boosting	logB, C2, AB, AC	4	4.71192	3.42564	-0.482614	5.46583
Particle_size_nm	Extra_Trees	BC, B2	2	3.5681	2.52413	0.149833	3.85354
Particle_size_nm	Extra_Trees	BC, B	2	3.5767	2.52169	0.145729	3.86283
Particle_size_nm	Extra_Trees	BC, logC	2	4.57783	3.0634	-0.399431	4.94406
Particle_size_nm	Extra_Trees	BC, sqrtC	2	4.57367	3.05892	-0.396884	4.93956
Particle_size_nm	Extra_Trees	BC, C	2	4.57241	3.05887	-0.396119	4.93821
Particle_size_nm	Extra_Trees	BC, logB	2	3.58571	2.50975	0.141418	3.87257
Particle_size_nm	Extra_Trees	BC, C2	2	4.56381	3.04816	-0.390869	4.92891
Particle_size_nm	Extra_Trees	BC, AB	2	5.142	3.306	-0.765614	5.55336
Particle_size_nm	Extra_Trees	BC, AC	2	4.28734	2.70453	-0.22746	4.63033
Particle_size_nm	Extra_Trees	B2, B	2	3.56437	2.70515	0.151609	3.84952
Particle_size_nm	Extra_Trees	B2, logC	2	3.78637	2.57083	0.042635	4.08928
Particle_size_nm	Extra_Trees	B2, sqrtC	2	3.78154	2.57354	0.0450764	4.08406
Particle_size_nm	Extra_Trees	B2, C	2	3.79978	2.5895	0.0358413	4.10376
Particle_size_nm	Extra_Trees	B2, logB	2	3.56437	2.70515	0.151609	3.84952
Particle_size_nm	Extra_Trees	B2, C2	2	3.79736	2.58678	0.0370686	4.10115
Particle_size_nm	Extra_Trees	B2, AB	2	4.90302	3.14079	-0.605309	5.29526
Particle_size_nm	Extra_Trees	B2, AC	2	3.63132	2.69126	0.119438	3.92182
Particle_size_nm	Extra_Trees	B, logC	2	3.85736	2.63723	0.00639953	4.16595
Particle_size_nm	Extra_Trees	B, sqrtC	2	3.85852	2.63179	0.00580238	4.1672
Particle_size_nm	Extra_Trees	B, C	2	3.87162	2.62641	-0.000961917	4.18135
Particle_size_nm	Extra_Trees	B, logB	2	3.56437	2.70515	0.151609	3.84952
Particle_size_nm	Extra_Trees	B, C2	2	3.87613	2.62436	-0.00329586	4.18622
Particle_size_nm	Extra_Trees	B, AB	2	4.92167	3.21141	-0.617545	5.3154
Particle_size_nm	Extra_Trees	B, AC	2	3.6361	2.69644	0.117116	3.92699
Particle_size_nm	Extra_Trees	logC, sqrtC	2	4.68389	3.3798	-0.465022	5.0586
Particle_size_nm	Extra_Trees	logC, C	2	4.68389	3.3798	-0.465022	5.0586
Particle_size_nm	Extra_Trees	logC, logB	2	3.88416	2.64306	-0.0074557	4.19489
Particle_size_nm	Extra_Trees	logC, C2	2	4.68389	3.3798	-0.465022	5.0586
Particle_size_nm	Extra_Trees	logC, AB	2	6.15523	4.20534	-1.53	6.64765
Particle_size_nm	Extra_Trees	logC, AC	2	5.65786	4.38146	-1.13765	6.11049
Particle_size_nm	Extra_Trees	sqrtC, C	2	4.68389	3.3798	-0.465022	5.0586
Particle_size_nm	Extra_Trees	sqrtC, logB	2	3.88299	2.64165	-0.00684664	4.19363
Particle_size_nm	Extra_Trees	sqrtC, C2	2	4.68389	3.3798	-0.465022	5.0586
Particle_size_nm	Extra_Trees	sqrtC, AB	2	6.14274	4.19276	-1.51974	6.63416
Particle_size_nm	Extra_Trees	sqrtC, AC	2	5.65676	4.37893	-1.13682	6.1093
Particle_size_nm	Extra_Trees	C, logB	2	3.88466	2.63915	-0.00771566	4.19543
Particle_size_nm	Extra_Trees	C, C2	2	4.68389	3.3798	-0.465022	5.0586
Particle_size_nm	Extra_Trees	C, AB	2	6.14322	4.18381	-1.52014	6.63468
Particle_size_nm	Extra_Trees	C, AC	2	5.65586	4.37569	-1.13613	6.10832
Particle_size_nm	Extra_Trees	logB, C2	2	3.91662	2.66478	-0.024365	4.22995
Particle_size_nm	Extra_Trees	logB, AB	2	4.93511	3.24048	-0.626391	5.32992
Particle_size_nm	Extra_Trees	logB, AC	2	3.65172	2.70086	0.109517	3.94385
Particle_size_nm	Extra_Trees	C2, AB	2	6.11064	4.11672	-1.49348	6.59949
Particle_size_nm	Extra_Trees	C2, AC	2	5.6548	4.37127	-1.13534	6.10719
Particle_size_nm	Extra_Trees	AB, AC	2	4.95415	3.62268	-0.638965	5.35048
Particle_size_nm	Extra_Trees	BC, B2, B	3	3.44589	2.47895	0.207069	3.8594
Particle_size_nm	Extra_Trees	BC, B2, logC	3	3.74732	2.57376	0.062281	4.197
Particle_size_nm	Extra_Trees	BC, B2, sqrtC	3	3.74526	2.5758	0.0633117	4.19469
Particle_size_nm	Extra_Trees	BC, B2, C	3	3.74354	2.57698	0.064172	4.19276
Particle_size_nm	Extra_Trees	BC, B2, logB	3	3.45663	2.47974	0.20212	3.87143
Particle_size_nm	Extra_Trees	BC, B2, C2	3	3.72851	2.5724	0.0716692	4.17593
Particle_size_nm	Extra_Trees	BC, B2, AB	3	3.9013	2.70055	-0.0163649	4.36945
Particle_size_nm	Extra_Trees	BC, B2, AC	3	3.13667	1.97797	0.342996	3.51307
Particle_size_nm	Extra_Trees	BC, B, logC	3	3.776	2.56312	0.0478731	4.22912
Particle_size_nm	Extra_Trees	BC, B, sqrtC	3	3.7734	2.56493	0.0491802	4.22621
Particle_size_nm	Extra_Trees	BC, B, C	3	3.77152	2.56612	0.0501315	4.2241
Particle_size_nm	Extra_Trees	BC, B, logB	3	3.45201	2.46841	0.204254	3.86625
Particle_size_nm	Extra_Trees	BC, B, C2	3	3.759	2.56516	0.0564231	4.21009
Particle_size_nm	Extra_Trees	BC, B, AB	3	3.91389	2.70611	-0.0229374	4.38356
Particle_size_nm	Extra_Trees	BC, B, AC	3	3.14434	1.96578	0.339776	3.52166
Particle_size_nm	Extra_Trees	BC, logC, sqrtC	3	4.6193	3.10511	-0.4249	5.17362
Particle_size_nm	Extra_Trees	BC, logC, C	3	4.61771	3.10301	-0.42392	5.17184
Particle_size_nm	Extra_Trees	BC, logC, logB	3	3.83862	2.58142	0.0160289	4.29926
Particle_size_nm	Extra_Trees	BC, logC, C2	3	4.61607	3.10239	-0.422906	5.17
Particle_size_nm	Extra_Trees	BC, logC, AB	3	5.04495	3.19627	-0.699593	5.65034
Particle_size_nm	Extra_Trees	BC, logC, AC	3	4.13347	2.62655	-0.140933	4.62948
Particle_size_nm	Extra_Trees	BC, sqrtC, C	3	4.6127	3.09796	-0.420833	5.16623
Particle_size_nm	Extra_Trees	BC, sqrtC, logB	3	3.83079	2.57439	0.020042	4.29048
Particle_size_nm	Extra_Trees	BC, sqrtC, C2	3	4.61104	3.09677	-0.419804	5.16436
Particle_size_nm	Extra_Trees	BC, sqrtC, AB	3	5.04317	3.19817	-0.698397	5.64835
Particle_size_nm	Extra_Trees	BC, sqrtC, AC	3	4.14342	2.62586	-0.146433	4.64063
Particle_size_nm	Extra_Trees	BC, C, logB	3	3.81104	2.56836	0.0301171	4.26837
Particle_size_nm	Extra_Trees	BC, C, C2	3	4.60938	3.09558	-0.418784	5.1625
Particle_size_nm	Extra_Trees	BC, C, AB	3	5.05984	3.21789	-0.709641	5.66702
Particle_size_nm	Extra_Trees	BC, C, AC	3	4.13133	2.6198	-0.139757	4.62709
Particle_size_nm	Extra_Trees	BC, logB, C2	3	3.80652	2.55955	0.0324177	4.2633
Particle_size_nm	Extra_Trees	BC, logB, AB	3	3.97565	2.74298	-0.0554768	4.45273
Particle_size_nm	Extra_Trees	BC, logB, AC	3	3.17615	1.96809	0.32635	3.55729
Particle_size_nm	Extra_Trees	BC, C2, AB	3	5.02241	3.20142	-0.68444	5.6251
Particle_size_nm	Extra_Trees	BC, C2, AC	3	4.11375	2.60519	-0.130074	4.6074
Particle_size_nm	Extra_Trees	BC, AB, AC	3	4.64289	3.13075	-0.439489	5.20004
Particle_size_nm	Extra_Trees	B2, B, logC	3	3.64328	2.62668	0.113626	4.08048
Particle_size_nm	Extra_Trees	B2, B, sqrtC	3	3.62439	2.61688	0.122793	4.05932
Particle_size_nm	Extra_Trees	B2, B, C	3	3.61496	2.61319	0.127352	4.04876
Particle_size_nm	Extra_Trees	B2, B, logB	3	3.56437	2.70515	0.151609	3.99209
Particle_size_nm	Extra_Trees	B2, B, C2	3	3.58636	2.5945	0.141107	4.01672
Particle_size_nm	Extra_Trees	B2, B, AB	3	4.88617	3.05535	-0.594296	5.47251
Particle_size_nm	Extra_Trees	B2, B, AC	3	3.657	2.75356	0.106938	4.09584
Particle_size_nm	Extra_Trees	B2, logC, sqrtC	3	3.78817	2.6011	0.041722	4.24276
Particle_size_nm	Extra_Trees	B2, logC, C	3	3.77539	2.5969	0.0481786	4.22844
Particle_size_nm	Extra_Trees	B2, logC, logB	3	3.61623	2.60296	0.126741	4.05018
Particle_size_nm	Extra_Trees	B2, logC, C2	3	3.77211	2.59504	0.0498346	4.22476
Particle_size_nm	Extra_Trees	B2, logC, AB	3	4.10409	2.46877	-0.124774	4.59658
Particle_size_nm	Extra_Trees	B2, logC, AC	3	3.33703	2.13581	0.256377	3.73748
Particle_size_nm	Extra_Trees	B2, sqrtC, C	3	3.77243	2.59492	0.0496723	4.22512
Particle_size_nm	Extra_Trees	B2, sqrtC, logB	3	3.6039	2.59621	0.132686	4.03637
Particle_size_nm	Extra_Trees	B2, sqrtC, C2	3	3.7659	2.59118	0.0529564	4.21781
Particle_size_nm	Extra_Trees	B2, sqrtC, AB	3	4.09171	2.47546	-0.117998	4.58271
Particle_size_nm	Extra_Trees	B2, sqrtC, AC	3	3.3233	2.13823	0.262486	3.7221
Particle_size_nm	Extra_Trees	B2, C, logB	3	3.6147	2.6073	0.12748	4.04846
Particle_size_nm	Extra_Trees	B2, C, C2	3	3.76425	2.59191	0.0537884	4.21596
Particle_size_nm	Extra_Trees	B2, C, AB	3	4.10706	2.50386	-0.126403	4.59991
Particle_size_nm	Extra_Trees	B2, C, AC	3	3.30591	2.12594	0.270184	3.70262
Particle_size_nm	Extra_Trees	B2, logB, C2	3	3.59272	2.58771	0.138056	4.02385
Particle_size_nm	Extra_Trees	B2, logB, AB	3	4.8835	3.04221	-0.592553	5.46952
Particle_size_nm	Extra_Trees	B2, logB, AC	3	3.66664	2.76205	0.102224	4.10664
Particle_size_nm	Extra_Trees	B2, C2, AB	3	4.13305	2.55154	-0.140705	4.62902
Particle_size_nm	Extra_Trees	B2, C2, AC	3	3.31579	2.15368	0.265817	3.71368
Particle_size_nm	Extra_Trees	B2, AB, AC	3	3.92038	2.78571	-0.026333	4.39083
Particle_size_nm	Extra_Trees	B, logC, sqrtC	3	3.8373	2.61614	0.0167071	4.29778
Particle_size_nm	Extra_Trees	B, logC, C	3	3.82737	2.60793	0.0217895	4.28665
Particle_size_nm	Extra_Trees	B, logC, logB	3	3.63388	2.59724	0.118197	4.06994
Particle_size_nm	Extra_Trees	B, logC, C2	3	3.82784	2.60781	0.0215507	4.28718
Particle_size_nm	Extra_Trees	B, logC, AB	3	4.16975	2.49324	-0.16105	4.67012
Particle_size_nm	Extra_Trees	B, logC, AC	3	3.37989	2.10988	0.237153	3.78548
Particle_size_nm	Extra_Trees	B, sqrtC, C	3	3.82459	2.60594	0.0232099	4.28354
Particle_size_nm	Extra_Trees	B, sqrtC, logB	3	3.61998	2.58755	0.124929	4.05437
Particle_size_nm	Extra_Trees	B, sqrtC, C2	3	3.82187	2.60396	0.024601	4.28049
Particle_size_nm	Extra_Trees	B, sqrtC, AB	3	4.16667	2.50204	-0.159336	4.66667
Particle_size_nm	Extra_Trees	B, sqrtC, AC	3	3.3652	2.11253	0.243769	3.76903
Particle_size_nm	Extra_Trees	B, C, logB	3	3.62608	2.59768	0.121974	4.06121
Particle_size_nm	Extra_Trees	B, C, C2	3	3.82387	2.59761	0.0235783	4.28273
Particle_size_nm	Extra_Trees	B, C, AB	3	4.19235	2.55026	-0.173671	4.69543
Particle_size_nm	Extra_Trees	B, C, AC	3	3.3447	2.10556	0.252955	3.74607
Particle_size_nm	Extra_Trees	B, logB, C2	3	3.61396	2.58669	0.127837	4.04763
Particle_size_nm	Extra_Trees	B, logB, AB	3	4.88281	3.03377	-0.592104	5.46875
Particle_size_nm	Extra_Trees	B, logB, AC	3	3.67743	2.76183	0.0969326	4.11872
Particle_size_nm	Extra_Trees	B, C2, AB	3	4.21614	2.59473	-0.187032	4.72208
Particle_size_nm	Extra_Trees	B, C2, AC	3	3.34012	2.12406	0.255003	3.74093
Particle_size_nm	Extra_Trees	B, AB, AC	3	3.91429	2.77319	-0.0231472	4.38401
Particle_size_nm	Extra_Trees	logC, sqrtC, C	3	4.68389	3.3798	-0.465022	5.24595
Particle_size_nm	Extra_Trees	logC, sqrtC, logB	3	3.85137	2.67694	0.00948108	4.31354
Particle_size_nm	Extra_Trees	logC, sqrtC, C2	3	4.68389	3.3798	-0.465022	5.24595
Particle_size_nm	Extra_Trees	logC, sqrtC, AB	3	6.20376	4.31359	-1.57005	6.94821
Particle_size_nm	Extra_Trees	logC, sqrtC, AC	3	5.67661	4.41419	-1.15184	6.3578
Particle_size_nm	Extra_Trees	logC, C, logB	3	3.84727	2.67281	0.0115917	4.30894
Particle_size_nm	Extra_Trees	logC, C, C2	3	4.68389	3.3798	-0.465022	5.24595
Particle_size_nm	Extra_Trees	logC, C, AB	3	6.20796	4.31044	-1.57353	6.95292
Particle_size_nm	Extra_Trees	logC, C, AC	3	5.67171	4.40832	-1.14812	6.35231
Particle_size_nm	Extra_Trees	logC, logB, C2	3	3.92922	2.71696	-0.0309666	4.40073
Particle_size_nm	Extra_Trees	logC, logB, AB	3	4.33602	2.53794	-0.25549	4.85634
Particle_size_nm	Extra_Trees	logC, logB, AC	3	3.38944	2.02956	0.232836	3.79618
Particle_size_nm	Extra_Trees	logC, C2, AB	3	6.19977	4.29398	-1.56674	6.94374
Particle_size_nm	Extra_Trees	logC, C2, AC	3	5.66885	4.40362	-1.14596	6.34911
Particle_size_nm	Extra_Trees	logC, AB, AC	3	5.86249	4.23142	-1.29507	6.56599
Particle_size_nm	Extra_Trees	sqrtC, C, logB	3	3.84223	2.66573	0.0141766	4.3033
Particle_size_nm	Extra_Trees	sqrtC, C, C2	3	4.68389	3.3798	-0.465022	5.24595
Particle_size_nm	Extra_Trees	sqrtC, C, AB	3	6.197	4.29985	-1.56445	6.94064
Particle_size_nm	Extra_Trees	sqrtC, C, AC	3	5.66821	4.40423	-1.14547	6.34839
Particle_size_nm	Extra_Trees	sqrtC, logB, C2	3	3.92955	2.71413	-0.031138	4.40109
Particle_size_nm	Extra_Trees	sqrtC, logB, AB	3	4.32428	2.53204	-0.248704	4.8432
Particle_size_nm	Extra_Trees	sqrtC, logB, AC	3	3.39978	2.05103	0.228148	3.80776
Particle_size_nm	Extra_Trees	sqrtC, C2, AB	3	6.18873	4.28318	-1.55761	6.93137
Particle_size_nm	Extra_Trees	sqrtC, C2, AC	3	5.66538	4.39954	-1.14333	6.34522
Particle_size_nm	Extra_Trees	sqrtC, AB, AC	3	5.8383	4.20463	-1.27617	6.53889
Particle_size_nm	Extra_Trees	C, logB, C2	3	3.92511	2.7066	-0.0288091	4.39612
Particle_size_nm	Extra_Trees	C, logB, AB	3	4.35115	2.59962	-0.26427	4.87329
Particle_size_nm	Extra_Trees	C, logB, AC	3	3.41824	2.09738	0.219744	3.82843
Particle_size_nm	Extra_Trees	C, C2, AB	3	6.17875	4.27147	-1.54937	6.92021
Particle_size_nm	Extra_Trees	C, C2, AC	3	5.66295	4.39693	-1.1415	6.34251
Particle_size_nm	Extra_Trees	C, AB, AC	3	5.83459	4.20077	-1.27328	6.53474
Particle_size_nm	Extra_Trees	logB, C2, AB	3	4.23612	2.57417	-0.198306	4.74445
Particle_size_nm	Extra_Trees	logB, C2, AC	3	3.40228	2.15764	0.227014	3.81055
Particle_size_nm	Extra_Trees	logB, AB, AC	3	3.8668	2.71435	0.00152764	4.33082
Particle_size_nm	Extra_Trees	C2, AB, AC	3	5.77755	4.15052	-1.22904	6.47085
Particle_size_nm	Extra_Trees	BC, B2, B, logC	4	3.68805	2.64428	0.0917078	4.27814
Particle_size_nm	Extra_Trees	BC, B2, B, sqrtC	4	3.66868	2.63182	0.101223	4.25567
Particle_size_nm	Extra_Trees	BC, B2, B, C	4	3.6625	2.62808	0.104251	4.2485
Particle_size_nm	Extra_Trees	BC, B2, B, logB	4	3.40929	2.4743	0.223825	3.95478
Particle_size_nm	Extra_Trees	BC, B2, B, C2	4	3.64374	2.61618	0.113401	4.22674
Particle_size_nm	Extra_Trees	BC, B2, B, AB	4	3.77113	2.665	0.0503272	4.37451
Particle_size_nm	Extra_Trees	BC, B2, B, AC	4	3.02182	2.01871	0.390227	3.50531
Particle_size_nm	Extra_Trees	BC, B2, logC, sqrtC	4	3.78468	2.62539	0.043488	4.39023
Particle_size_nm	Extra_Trees	BC, B2, logC, C	4	3.78461	2.62505	0.0435254	4.39015
Particle_size_nm	Extra_Trees	BC, B2, logC, logB	4	3.68474	2.62487	0.0933378	4.2743
Particle_size_nm	Extra_Trees	BC, B2, logC, C2	4	3.78491	2.62545	0.0433709	4.3905
Particle_size_nm	Extra_Trees	BC, B2, logC, AB	4	4.11267	2.69786	-0.129481	4.77069
Particle_size_nm	Extra_Trees	BC, B2, logC, AC	4	3.29446	2.08402	0.275229	3.82158
Particle_size_nm	Extra_Trees	BC, B2, sqrtC, C	4	3.78902	2.62975	0.0412956	4.39526
Particle_size_nm	Extra_Trees	BC, B2, sqrtC, logB	4	3.67063	2.61847	0.100271	4.25793
Particle_size_nm	Extra_Trees	BC, B2, sqrtC, C2	4	3.78932	2.62981	0.0411444	4.39561
Particle_size_nm	Extra_Trees	BC, B2, sqrtC, AB	4	4.13846	2.71519	-0.143692	4.80061
Particle_size_nm	Extra_Trees	BC, B2, sqrtC, AC	4	3.30279	2.09871	0.271562	3.83123
Particle_size_nm	Extra_Trees	BC, B2, C, logB	4	3.66417	2.6145	0.103434	4.25043
Particle_size_nm	Extra_Trees	BC, B2, C, C2	4	3.78901	2.62798	0.041298	4.39525
Particle_size_nm	Extra_Trees	BC, B2, C, AB	4	4.13708	2.72065	-0.142928	4.79901
Particle_size_nm	Extra_Trees	BC, B2, C, AC	4	3.31001	2.09766	0.268374	3.83961
Particle_size_nm	Extra_Trees	BC, B2, logB, C2	4	3.64567	2.61391	0.112462	4.22898
Particle_size_nm	Extra_Trees	BC, B2, logB, AB	4	3.78068	2.66589	0.0455093	4.38559
Particle_size_nm	Extra_Trees	BC, B2, logB, AC	4	3.01772	2.00017	0.39188	3.50055
Particle_size_nm	Extra_Trees	BC, B2, C2, AB	4	4.13738	2.72991	-0.143093	4.79936
Particle_size_nm	Extra_Trees	BC, B2, C2, AC	4	3.34012	2.13137	0.255002	3.87454
Particle_size_nm	Extra_Trees	BC, B2, AB, AC	4	3.58062	2.41234	0.143852	4.15352
Particle_size_nm	Extra_Trees	BC, B, logC, sqrtC	4	3.8079	2.61302	0.0317156	4.41717
Particle_size_nm	Extra_Trees	BC, B, logC, C	4	3.80783	2.61268	0.0317507	4.41709
Particle_size_nm	Extra_Trees	BC, B, logC, logB	4	3.69816	2.61949	0.0867205	4.28987
Particle_size_nm	Extra_Trees	BC, B, logC, C2	4	3.80796	2.61308	0.031686	4.41723
Particle_size_nm	Extra_Trees	BC, B, logC, AB	4	4.13748	2.70409	-0.143152	4.79948
Particle_size_nm	Extra_Trees	BC, B, logC, AC	4	3.31394	2.09745	0.266635	3.84417
Particle_size_nm	Extra_Trees	BC, B, sqrtC, C	4	3.81199	2.61738	0.0296373	4.4219
Particle_size_nm	Extra_Trees	BC, B, sqrtC, logB	4	3.68374	2.61309	0.0938324	4.27313
Particle_size_nm	Extra_Trees	BC, B, sqrtC, C2	4	3.81219	2.61743	0.0295337	4.42214
Particle_size_nm	Extra_Trees	BC, B, sqrtC, AB	4	4.17262	2.73249	-0.16265	4.84024
Particle_size_nm	Extra_Trees	BC, B, sqrtC, AC	4	3.32402	2.11576	0.262167	3.85586
Particle_size_nm	Extra_Trees	BC, B, C, logB	4	3.67726	2.60912	0.0970167	4.26562
Particle_size_nm	Extra_Trees	BC, B, C, C2	4	3.81551	2.61736	0.0278434	4.42599
Particle_size_nm	Extra_Trees	BC, B, C, AB	4	4.1721	2.73485	-0.162359	4.83963
Particle_size_nm	Extra_Trees	BC, B, C, AC	4	3.329	2.11044	0.259954	3.86164
Particle_size_nm	Extra_Trees	BC, B, logB, C2	4	3.64989	2.60927	0.110407	4.23387
Particle_size_nm	Extra_Trees	BC, B, logB, AB	4	3.7751	2.66316	0.0483271	4.37911
Particle_size_nm	Extra_Trees	BC, B, logB, AC	4	3.02456	2.00838	0.38912	3.50849
Particle_size_nm	Extra_Trees	BC, B, C2, AB	4	4.17488	2.74298	-0.163913	4.84287
Particle_size_nm	Extra_Trees	BC, B, C2, AC	4	3.35778	2.14254	0.247103	3.89502
Particle_size_nm	Extra_Trees	BC, B, AB, AC	4	3.6077	2.42874	0.130855	4.18493
Particle_size_nm	Extra_Trees	BC, logC, sqrtC, C	4	4.6484	3.1449	-0.442907	5.39214
Particle_size_nm	Extra_Trees	BC, logC, sqrtC, logB	4	3.88566	2.63434	-0.00823503	4.50737
Particle_size_nm	Extra_Trees	BC, logC, sqrtC, C2	4	4.6449	3.14218	-0.440737	5.38809
Particle_size_nm	Extra_Trees	BC, logC, sqrtC, AB	4	5.03853	3.19217	-0.695274	5.8447
Particle_size_nm	Extra_Trees	BC, logC, sqrtC, AC	4	4.18691	2.63481	-0.170626	4.85681
Particle_size_nm	Extra_Trees	BC, logC, C, logB	4	3.87872	2.6298	-0.00463776	4.49932
Particle_size_nm	Extra_Trees	BC, logC, C, C2	4	4.6449	3.14218	-0.440737	5.38809
Particle_size_nm	Extra_Trees	BC, logC, C, AB	4	5.03829	3.1909	-0.695112	5.84442
Particle_size_nm	Extra_Trees	BC, logC, C, AC	4	4.18907	2.62918	-0.171839	4.85933
Particle_size_nm	Extra_Trees	BC, logC, logB, C2	4	3.90391	2.62684	-0.0177273	4.52854
Particle_size_nm	Extra_Trees	BC, logC, logB, AB	4	4.20057	2.69535	-0.178278	4.87266
Particle_size_nm	Extra_Trees	BC, logC, logB, AC	4	3.34349	2.04461	0.253495	3.87845
Particle_size_nm	Extra_Trees	BC, logC, C2, AB	4	5.03023	3.17027	-0.689692	5.83507
Particle_size_nm	Extra_Trees	BC, logC, C2, AC	4	4.18006	2.61916	-0.166799	4.84887
Particle_size_nm	Extra_Trees	BC, logC, AB, AC	4	4.69035	3.13349	-0.469066	5.4408
Particle_size_nm	Extra_Trees	BC, sqrtC, C, logB	4	3.86811	2.62465	0.000855848	4.487
Particle_size_nm	Extra_Trees	BC, sqrtC, C, C2	4	4.643	3.14042	-0.439557	5.38588
Particle_size_nm	Extra_Trees	BC, sqrtC, C, AB	4	5.05503	3.21423	-0.706395	5.86384
Particle_size_nm	Extra_Trees	BC, sqrtC, C, AC	4	4.18762	2.62032	-0.171024	4.85764
Particle_size_nm	Extra_Trees	BC, sqrtC, logB, C2	4	3.89326	2.61857	-0.0121811	4.51618
Particle_size_nm	Extra_Trees	BC, sqrtC, logB, AB	4	4.20672	2.71509	-0.181734	4.8798
Particle_size_nm	Extra_Trees	BC, sqrtC, logB, AC	4	3.34567	2.04632	0.252523	3.88098
Particle_size_nm	Extra_Trees	BC, sqrtC, C2, AB	4	5.05317	3.2001	-0.705136	5.86168
Particle_size_nm	Extra_Trees	BC, sqrtC, C2, AC	4	4.17949	2.614	-0.166483	4.84821
Particle_size_nm	Extra_Trees	BC, sqrtC, AB, AC	4	4.6901	3.14337	-0.468915	5.44052
Particle_size_nm	Extra_Trees	BC, C, logB, C2	4	3.89427	2.61765	-0.0127083	4.51736
Particle_size_nm	Extra_Trees	BC, C, logB, AB	4	4.1983	2.72522	-0.177007	4.87003
Particle_size_nm	Extra_Trees	BC, C, logB, AC	4	3.32753	2.03989	0.260609	3.85993
Particle_size_nm	Extra_Trees	BC, C, C2, AB	4	5.05817	3.20918	-0.708511	5.86747
Particle_size_nm	Extra_Trees	BC, C, C2, AC	4	4.18295	2.61539	-0.168417	4.85223
Particle_size_nm	Extra_Trees	BC, C, AB, AC	4	4.6918	3.1533	-0.469978	5.44249
Particle_size_nm	Extra_Trees	BC, logB, C2, AB	4	4.22419	2.7526	-0.191564	4.90005
Particle_size_nm	Extra_Trees	BC, logB, C2, AC	4	3.37664	2.11672	0.238619	3.91691
Particle_size_nm	Extra_Trees	BC, logB, AB, AC	4	3.68358	2.44791	0.0939082	4.27296
Particle_size_nm	Extra_Trees	BC, C2, AB, AC	4	4.70242	3.16885	-0.476641	5.45481
Particle_size_nm	Extra_Trees	B2, B, logC, sqrtC	4	3.6879	2.64279	0.0917845	4.27796
Particle_size_nm	Extra_Trees	B2, B, logC, C	4	3.6879	2.64279	0.0917845	4.27796
Particle_size_nm	Extra_Trees	B2, B, logC, logB	4	3.60244	2.63121	0.133386	4.17883
Particle_size_nm	Extra_Trees	B2, B, logC, C2	4	3.67787	2.63718	0.096718	4.26632
Particle_size_nm	Extra_Trees	B2, B, logC, AB	4	4.08085	2.60573	-0.11207	4.73378
Particle_size_nm	Extra_Trees	B2, B, logC, AC	4	3.36464	2.13384	0.244023	3.90298
Particle_size_nm	Extra_Trees	B2, B, sqrtC, C	4	3.69124	2.64845	0.0901348	4.28184
Particle_size_nm	Extra_Trees	B2, B, sqrtC, logB	4	3.58555	2.62192	0.141494	4.15924
Particle_size_nm	Extra_Trees	B2, B, sqrtC, C2	4	3.67141	2.63723	0.0998847	4.25884
Particle_size_nm	Extra_Trees	B2, B, sqrtC, AB	4	4.08714	2.61262	-0.115503	4.74108
Particle_size_nm	Extra_Trees	B2, B, sqrtC, AC	4	3.34866	2.11405	0.251187	3.88444
Particle_size_nm	Extra_Trees	B2, B, C, logB	4	3.56862	2.6107	0.149585	4.13959
Particle_size_nm	Extra_Trees	B2, B, C, C2	4	3.66675	2.63633	0.102172	4.25342
Particle_size_nm	Extra_Trees	B2, B, C, AB	4	4.09234	2.63636	-0.11834	4.74711
Particle_size_nm	Extra_Trees	B2, B, C, AC	4	3.3362	2.10015	0.256747	3.87
Particle_size_nm	Extra_Trees	B2, B, logB, C2	4	3.54314	2.59201	0.161681	4.11005
Particle_size_nm	Extra_Trees	B2, B, logB, AB	4	4.89461	3.08531	-0.599809	5.67775
Particle_size_nm	Extra_Trees	B2, B, logB, AC	4	3.69048	2.77988	0.0905108	4.28096
Particle_size_nm	Extra_Trees	B2, B, C2, AB	4	4.11245	2.66697	-0.129364	4.77045
Particle_size_nm	Extra_Trees	B2, B, C2, AC	4	3.30767	2.10545	0.269407	3.8369
Particle_size_nm	Extra_Trees	B2, B, AB, AC	4	3.9449	2.77212	-0.0392093	4.57608
Particle_size_nm	Extra_Trees	B2, logC, sqrtC, C	4	3.83281	2.59975	0.0190042	4.44606
Particle_size_nm	Extra_Trees	B2, logC, sqrtC, logB	4	3.70904	2.62382	0.0813425	4.30248
Particle_size_nm	Extra_Trees	B2, logC, sqrtC, C2	4	3.82605	2.59635	0.0224619	4.43822
Particle_size_nm	Extra_Trees	B2, logC, sqrtC, AB	4	4.15806	2.49938	-0.154552	4.82335
Particle_size_nm	Extra_Trees	B2, logC, sqrtC, AC	4	3.53188	2.13236	0.167005	4.09698
Particle_size_nm	Extra_Trees	B2, logC, C, logB	4	3.70333	2.62291	0.0841646	4.29587
Particle_size_nm	Extra_Trees	B2, logC, C, C2	4	3.82276	2.59777	0.0241437	4.4344
Particle_size_nm	Extra_Trees	B2, logC, C, AB	4	4.17235	2.5149	-0.162501	4.83993
Particle_size_nm	Extra_Trees	B2, logC, C, AC	4	3.53121	2.12288	0.167319	4.0962
Particle_size_nm	Extra_Trees	B2, logC, logB, C2	4	3.67324	2.60518	0.0989891	4.26096
Particle_size_nm	Extra_Trees	B2, logC, logB, AB	4	4.10254	2.6138	-0.123926	4.75895
Particle_size_nm	Extra_Trees	B2, logC, logB, AC	4	3.34384	2.10667	0.253341	3.87885
Particle_size_nm	Extra_Trees	B2, logC, C2, AB	4	4.18797	2.55601	-0.17122	4.85804
Particle_size_nm	Extra_Trees	B2, logC, C2, AC	4	3.51591	2.10952	0.174518	4.07846
Particle_size_nm	Extra_Trees	B2, logC, AB, AC	4	3.87395	2.38345	-0.00216619	4.49378
Particle_size_nm	Extra_Trees	B2, sqrtC, C, logB	4	3.68998	2.61578	0.0907601	4.28037
Particle_size_nm	Extra_Trees	B2, sqrtC, C, C2	4	3.82305	2.60094	0.0239948	4.43474
Particle_size_nm	Extra_Trees	B2, sqrtC, C, AB	4	4.17919	2.52364	-0.166315	4.84786
Particle_size_nm	Extra_Trees	B2, sqrtC, C, AC	4	3.50333	2.11423	0.180415	4.06386
Particle_size_nm	Extra_Trees	B2, sqrtC, logB, C2	4	3.66366	2.59946	0.103683	4.24984
Particle_size_nm	Extra_Trees	B2, sqrtC, logB, AB	4	4.07925	2.61541	-0.111199	4.73193
Particle_size_nm	Extra_Trees	B2, sqrtC, logB, AC	4	3.30795	2.10406	0.269282	3.83722
Particle_size_nm	Extra_Trees	B2, sqrtC, C2, AB	4	4.19947	2.57509	-0.177664	4.87139
Particle_size_nm	Extra_Trees	B2, sqrtC, C2, AC	4	3.48986	2.10806	0.186707	4.04824
Particle_size_nm	Extra_Trees	B2, sqrtC, AB, AC	4	3.85207	2.37238	0.00912511	4.4684
Particle_size_nm	Extra_Trees	B2, C, logB, C2	4	3.65409	2.59798	0.108358	4.23875
Particle_size_nm	Extra_Trees	B2, C, logB, AB	4	4.09476	2.61974	-0.119668	4.74993
Particle_size_nm	Extra_Trees	B2, C, logB, AC	4	3.30082	2.10359	0.272431	3.82895
Particle_size_nm	Extra_Trees	B2, C, C2, AB	4	4.21474	2.5832	-0.186243	4.8891
Particle_size_nm	Extra_Trees	B2, C, C2, AC	4	3.47097	2.1145	0.195484	4.02633
Particle_size_nm	Extra_Trees	B2, C, AB, AC	4	3.84685	2.37471	0.0118055	4.46235
Particle_size_nm	Extra_Trees	B2, logB, C2, AB	4	4.1152	2.64342	-0.130873	4.77363
Particle_size_nm	Extra_Trees	B2, logB, C2, AC	4	3.32858	2.12393	0.26014	3.86115
Particle_size_nm	Extra_Trees	B2, logB, AB, AC	4	3.91763	2.76535	-0.0248908	4.54445
Particle_size_nm	Extra_Trees	B2, C2, AB, AC	4	3.82543	2.3949	0.0227794	4.4375
Particle_size_nm	Extra_Trees	B, logC, sqrtC, C	4	3.85059	2.6212	0.00988534	4.46668
Particle_size_nm	Extra_Trees	B, logC, sqrtC, logB	4	3.71806	2.62065	0.0768667	4.31295
Particle_size_nm	Extra_Trees	B, logC, sqrtC, C2	4	3.84386	2.6178	0.013342	4.45888
Particle_size_nm	Extra_Trees	B, logC, sqrtC, AB	4	4.16358	2.48108	-0.157621	4.82976
Particle_size_nm	Extra_Trees	B, logC, sqrtC, AC	4	3.56505	2.14032	0.151281	4.13546
Particle_size_nm	Extra_Trees	B, logC, C, logB	4	3.70914	2.61833	0.0812915	4.3026
Particle_size_nm	Extra_Trees	B, logC, C, C2	4	3.84039	2.61332	0.0151222	4.45485
Particle_size_nm	Extra_Trees	B, logC, C, AB	4	4.17914	2.49819	-0.166289	4.84781
Particle_size_nm	Extra_Trees	B, logC, C, AC	4	3.56325	2.13773	0.152138	4.13338
Particle_size_nm	Extra_Trees	B, logC, logB, C2	4	3.67818	2.59765	0.0965626	4.26669
Particle_size_nm	Extra_Trees	B, logC, logB, AB	4	4.09318	2.59647	-0.118801	4.74809
Particle_size_nm	Extra_Trees	B, logC, logB, AC	4	3.34066	2.10455	0.254762	3.87516
Particle_size_nm	Extra_Trees	B, logC, C2, AB	4	4.20415	2.54338	-0.180286	4.87681
Particle_size_nm	Extra_Trees	B, logC, C2, AC	4	3.55742	2.13056	0.154911	4.12661
Particle_size_nm	Extra_Trees	B, logC, AB, AC	4	3.91593	2.39243	-0.0240025	4.54248
Particle_size_nm	Extra_Trees	B, sqrtC, C, logB	4	3.69581	2.61119	0.0878846	4.28713
Particle_size_nm	Extra_Trees	B, sqrtC, C, C2	4	3.84056	2.6106	0.0150368	4.45505
Particle_size_nm	Extra_Trees	B, sqrtC, C, AB	4	4.18818	2.51154	-0.171339	4.85829
Particle_size_nm	Extra_Trees	B, sqrtC, C, AC	4	3.53769	2.12765	0.16426	4.10372
Particle_size_nm	Extra_Trees	B, sqrtC, logB, C2	4	3.66866	2.59193	0.101232	4.25565
Particle_size_nm	Extra_Trees	B, sqrtC, logB, AB	4	4.06996	2.601	-0.106145	4.72115
Particle_size_nm	Extra_Trees	B, sqrtC, logB, AC	4	3.30625	2.10197	0.270034	3.83525
Particle_size_nm	Extra_Trees	B, sqrtC, C2, AB	4	4.21798	2.56708	-0.188066	4.89286
Particle_size_nm	Extra_Trees	B, sqrtC, C2, AC	4	3.53358	2.14181	0.1662	4.09896
Particle_size_nm	Extra_Trees	B, sqrtC, AB, AC	4	3.90361	2.385	-0.0175678	4.52818
Particle_size_nm	Extra_Trees	B, C, logB, C2	4	3.65769	2.5875	0.106602	4.24292
Particle_size_nm	Extra_Trees	B, C, logB, AB	4	4.08454	2.60685	-0.114082	4.73806
Particle_size_nm	Extra_Trees	B, C, logB, AC	4	3.29769	2.10125	0.273808	3.82532
Particle_size_nm	Extra_Trees	B, C, C2, AB	4	4.23634	2.57589	-0.198433	4.91416
Particle_size_nm	Extra_Trees	B, C, C2, AC	4	3.51159	2.14592	0.176544	4.07345
Particle_size_nm	Extra_Trees	B, C, AB, AC	4	3.90362	2.38632	-0.017577	4.5282
Particle_size_nm	Extra_Trees	B, logB, C2, AB	4	4.12295	2.64996	-0.135134	4.78262
Particle_size_nm	Extra_Trees	B, logB, C2, AC	4	3.33344	2.11689	0.25798	3.86679
Particle_size_nm	Extra_Trees	B, logB, AB, AC	4	3.89607	2.75302	-0.0136456	4.51945
Particle_size_nm	Extra_Trees	B, C2, AB, AC	4	3.87398	2.39173	-0.00218151	4.49382
Particle_size_nm	Extra_Trees	logC, sqrtC, C, logB	4	3.95709	2.73663	-0.0456403	4.59022
Particle_size_nm	Extra_Trees	logC, sqrtC, C, C2	4	4.68389	3.3798	-0.465022	5.43331
Particle_size_nm	Extra_Trees	logC, sqrtC, C, AB	4	6.22608	4.33297	-1.58858	7.22225
Particle_size_nm	Extra_Trees	logC, sqrtC, C, AC	4	5.69263	4.42874	-1.164	6.60345
Particle_size_nm	Extra_Trees	logC, sqrtC, logB, C2	4	3.96713	2.75258	-0.0509573	4.60187
Particle_size_nm	Extra_Trees	logC, sqrtC, logB, AB	4	4.25439	2.46836	-0.208668	4.9351
Particle_size_nm	Extra_Trees	logC, sqrtC, logB, AC	4	3.529	2.09745	0.168359	4.09364
Particle_size_nm	Extra_Trees	logC, sqrtC, C2, AB	4	6.22145	4.32411	-1.58472	7.21688
Particle_size_nm	Extra_Trees	logC, sqrtC, C2, AC	4	5.69284	4.42902	-1.16416	6.60369
Particle_size_nm	Extra_Trees	logC, sqrtC, AB, AC	4	5.87117	4.21014	-1.30187	6.81056
Particle_size_nm	Extra_Trees	logC, C, logB, C2	4	3.96385	2.75071	-0.0492161	4.59806
Particle_size_nm	Extra_Trees	logC, C, logB, AB	4	4.25829	2.46644	-0.210884	4.93962
Particle_size_nm	Extra_Trees	logC, C, logB, AC	4	3.53347	2.10283	0.166252	4.09883
Particle_size_nm	Extra_Trees	logC, C, C2, AB	4	6.21737	4.32171	-1.58134	7.21215
Particle_size_nm	Extra_Trees	logC, C, C2, AC	4	5.69379	4.42947	-1.16488	6.6048
Particle_size_nm	Extra_Trees	logC, C, AB, AC	4	5.85473	4.2016	-1.289	6.79149
Particle_size_nm	Extra_Trees	logC, logB, C2, AB	4	4.2845	2.51204	-0.225832	4.97001
Particle_size_nm	Extra_Trees	logC, logB, C2, AC	4	3.59034	2.11977	0.1392	4.16479
Particle_size_nm	Extra_Trees	logC, logB, AB, AC	4	3.942	2.39725	-0.0376854	4.57272
Particle_size_nm	Extra_Trees	logC, C2, AB, AC	4	5.84796	4.1979	-1.2837	6.78363
Particle_size_nm	Extra_Trees	sqrtC, C, logB, C2	4	3.9546	2.73825	-0.0443296	4.58734
Particle_size_nm	Extra_Trees	sqrtC, C, logB, AB	4	4.26777	2.49964	-0.216279	4.95061
Particle_size_nm	Extra_Trees	sqrtC, C, logB, AC	4	3.5177	2.10942	0.173678	4.08053
Particle_size_nm	Extra_Trees	sqrtC, C, C2, AB	4	6.20983	4.30516	-1.57508	7.2034
Particle_size_nm	Extra_Trees	sqrtC, C, C2, AC	4	5.69201	4.42718	-1.16353	6.60273
Particle_size_nm	Extra_Trees	sqrtC, C, AB, AC	4	5.857	4.20227	-1.29077	6.79411
Particle_size_nm	Extra_Trees	sqrtC, logB, C2, AB	4	4.29824	2.52568	-0.23371	4.98596
Particle_size_nm	Extra_Trees	sqrtC, logB, C2, AC	4	3.59524	2.12546	0.136847	4.17048
Particle_size_nm	Extra_Trees	sqrtC, logB, AB, AC	4	3.93448	2.40346	-0.0337257	4.56399
Particle_size_nm	Extra_Trees	sqrtC, C2, AB, AC	4	5.8547	4.20481	-1.28897	6.79145
Particle_size_nm	Extra_Trees	C, logB, C2, AB	4	4.28556	2.53699	-0.226443	4.97125
Particle_size_nm	Extra_Trees	C, logB, C2, AC	4	3.58805	2.13601	0.140297	4.16214
Particle_size_nm	Extra_Trees	C, logB, AB, AC	4	3.91392	2.41469	-0.0229505	4.54014
Particle_size_nm	Extra_Trees	C, C2, AB, AC	4	5.83941	4.19089	-1.27703	6.77371
Particle_size_nm	Extra_Trees	logB, C2, AB, AC	4	3.88916	2.41017	-0.0100511	4.51143
Particle_size_nm	SVR_RBF	BC, B2	2	3.19852	2.10787	0.316828	3.4544
Particle_size_nm	SVR_RBF	BC, B	2	3.18424	2.08992	0.322916	3.43898
Particle_size_nm	SVR_RBF	BC, logC	2	3.9957	2.64749	-0.066147	4.31535
Particle_size_nm	SVR_RBF	BC, sqrtC	2	3.96093	2.6115	-0.0476714	4.2778
Particle_size_nm	SVR_RBF	BC, C	2	3.94568	2.59415	-0.0396239	4.26134
Particle_size_nm	SVR_RBF	BC, logB	2	3.16286	2.03975	0.331979	3.41588
Particle_size_nm	SVR_RBF	BC, C2	2	3.91674	2.59785	-0.024425	4.23007
Particle_size_nm	SVR_RBF	BC, AB	2	5.40292	3.87118	-0.949346	5.83516
Particle_size_nm	SVR_RBF	BC, AC	2	4.62415	3.30148	-0.427893	4.99408
Particle_size_nm	SVR_RBF	B2, B	2	3.35992	2.1477	0.246143	3.62871
Particle_size_nm	SVR_RBF	B2, logC	2	3.10251	2.05754	0.357225	3.35072
Particle_size_nm	SVR_RBF	B2, sqrtC	2	3.15389	2.08598	0.335759	3.40621
Particle_size_nm	SVR_RBF	B2, C	2	3.19306	2.09415	0.319161	3.4485
Particle_size_nm	SVR_RBF	B2, logB	2	3.35993	2.14778	0.24614	3.62872
Particle_size_nm	SVR_RBF	B2, C2	2	3.23259	2.07617	0.302197	3.4912
Particle_size_nm	SVR_RBF	B2, AB	2	4.74098	3.22875	-0.500953	5.12025
Particle_size_nm	SVR_RBF	B2, AC	2	3.6974	2.80042	0.0870972	3.99319
Particle_size_nm	SVR_RBF	B, logC	2	3.12194	2.04368	0.349152	3.37169
Particle_size_nm	SVR_RBF	B, sqrtC	2	3.17323	2.07422	0.327588	3.42709
Particle_size_nm	SVR_RBF	B, C	2	3.20889	2.07854	0.312392	3.4656
Particle_size_nm	SVR_RBF	B, logB	2	3.35997	2.14771	0.246122	3.62876
Particle_size_nm	SVR_RBF	B, C2	2	3.24057	2.07799	0.298748	3.49981
Particle_size_nm	SVR_RBF	B, AB	2	4.74065	3.25174	-0.500746	5.1199
Particle_size_nm	SVR_RBF	B, AC	2	3.78557	2.83838	0.0430393	4.08842
Particle_size_nm	SVR_RBF	logC, sqrtC	2	4.11642	2.70918	-0.13154	4.44573
Particle_size_nm	SVR_RBF	logC, C	2	4.11655	2.70919	-0.131613	4.44587
Particle_size_nm	SVR_RBF	logC, logB	2	3.11417	2.01894	0.352384	3.36331
Particle_size_nm	SVR_RBF	logC, C2	2	4.11687	2.7091	-0.131789	4.44622
Particle_size_nm	SVR_RBF	logC, AB	2	5.99676	4.05099	-1.4014	6.4765
Particle_size_nm	SVR_RBF	logC, AC	2	4.97968	3.82225	-0.655898	5.37805
Particle_size_nm	SVR_RBF	sqrtC, C	2	4.11667	2.7091	-0.13168	4.446
Particle_size_nm	SVR_RBF	sqrtC, logB	2	3.15752	2.02974	0.33423	3.41012
Particle_size_nm	SVR_RBF	sqrtC, C2	2	4.11714	2.70914	-0.131936	4.44651
Particle_size_nm	SVR_RBF	sqrtC, AB	2	6.00807	4.07829	-1.41047	6.48871
Particle_size_nm	SVR_RBF	sqrtC, AC	2	4.99652	3.84189	-0.667122	5.39624
Particle_size_nm	SVR_RBF	C, logB	2	3.19834	2.04938	0.316907	3.4542
Particle_size_nm	SVR_RBF	C, C2	2	4.1175	2.70931	-0.132137	4.4469
Particle_size_nm	SVR_RBF	C, AB	2	6.01398	4.10137	-1.41522	6.4951
Particle_size_nm	SVR_RBF	C, AC	2	5.00519	3.84883	-0.672911	5.40561
Particle_size_nm	SVR_RBF	logB, C2	2	3.24099	2.04915	0.298566	3.50027
Particle_size_nm	SVR_RBF	logB, AB	2	4.62209	3.19931	-0.426618	4.99185
Particle_size_nm	SVR_RBF	logB, AC	2	3.8641	2.85995	0.0029229	4.17323
Particle_size_nm	SVR_RBF	C2, AB	2	5.94146	4.0845	-1.35731	6.41677
Particle_size_nm	SVR_RBF	C2, AC	2	5.00196	3.83253	-0.670754	5.40212
Particle_size_nm	SVR_RBF	AB, AC	2	4.60554	3.15177	-0.416423	4.97399
Particle_size_nm	SVR_RBF	BC, B2, B	3	3.02296	1.95657	0.389765	3.38572
Particle_size_nm	SVR_RBF	BC, B2, logC	3	3.22683	2.03932	0.304683	3.61405
Particle_size_nm	SVR_RBF	BC, B2, sqrtC	3	3.23927	2.04372	0.299309	3.62799
Particle_size_nm	SVR_RBF	BC, B2, C	3	3.24946	2.05273	0.294896	3.63939
Particle_size_nm	SVR_RBF	BC, B2, logB	3	3.02494	1.95334	0.388966	3.38793
Particle_size_nm	SVR_RBF	BC, B2, C2	3	3.2642	2.06745	0.288485	3.6559
Particle_size_nm	SVR_RBF	BC, B2, AB	3	4.36181	2.82263	-0.270471	4.88523
Particle_size_nm	SVR_RBF	BC, B2, AC	3	3.49085	2.1934	0.186245	3.90975
Particle_size_nm	SVR_RBF	BC, B, logC	3	3.21966	2.0196	0.307767	3.60602
Particle_size_nm	SVR_RBF	BC, B, sqrtC	3	3.24349	2.03212	0.297485	3.6327
Particle_size_nm	SVR_RBF	BC, B, C	3	3.25805	2.04287	0.291161	3.64902
Particle_size_nm	SVR_RBF	BC, B, logB	3	3.0274	1.94746	0.387973	3.39068
Particle_size_nm	SVR_RBF	BC, B, C2	3	3.27386	2.0601	0.284265	3.66672
Particle_size_nm	SVR_RBF	BC, B, AB	3	4.52113	2.9464	-0.364976	5.06366
Particle_size_nm	SVR_RBF	BC, B, AC	3	3.50355	2.23489	0.180314	3.92397
Particle_size_nm	SVR_RBF	BC, logC, sqrtC	3	4.1486	2.7975	-0.149301	4.64643
Particle_size_nm	SVR_RBF	BC, logC, C	3	4.13282	2.79163	-0.140574	4.62875
Particle_size_nm	SVR_RBF	BC, logC, logB	3	3.20432	2.01693	0.31435	3.58883
Particle_size_nm	SVR_RBF	BC, logC, C2	3	4.10641	2.76984	-0.126045	4.59918
Particle_size_nm	SVR_RBF	BC, logC, AB	3	5.88375	4.07119	-1.31174	6.58979
Particle_size_nm	SVR_RBF	BC, logC, AC	3	5.24943	3.74802	-0.840164	5.87937
Particle_size_nm	SVR_RBF	BC, sqrtC, C	3	4.12301	2.78902	-0.135167	4.61777
Particle_size_nm	SVR_RBF	BC, sqrtC, logB	3	3.22786	2.03412	0.304236	3.61521
Particle_size_nm	SVR_RBF	BC, sqrtC, C2	3	4.0939	2.75619	-0.119193	4.58516
Particle_size_nm	SVR_RBF	BC, sqrtC, AB	3	5.81241	4.0126	-1.25602	6.5099
Particle_size_nm	SVR_RBF	BC, sqrtC, AC	3	5.22783	3.7242	-0.82505	5.85517
Particle_size_nm	SVR_RBF	BC, C, logB	3	3.24997	2.04967	0.294673	3.63997
Particle_size_nm	SVR_RBF	BC, C, C2	3	4.08261	2.74348	-0.113031	4.57252
Particle_size_nm	SVR_RBF	BC, C, AB	3	5.73339	3.9483	-1.1951	6.4214
Particle_size_nm	SVR_RBF	BC, C, AC	3	5.19741	3.69217	-0.803868	5.82109
Particle_size_nm	SVR_RBF	BC, logB, C2	3	3.28392	2.07095	0.279861	3.67799
Particle_size_nm	SVR_RBF	BC, logB, AB	3	4.70802	3.09429	-0.480157	5.27298
Particle_size_nm	SVR_RBF	BC, logB, AC	3	3.54443	2.3209	0.161074	3.96976
Particle_size_nm	SVR_RBF	BC, C2, AB	3	5.55719	3.79924	-1.06226	6.22406
Particle_size_nm	SVR_RBF	BC, C2, AC	3	5.11028	3.61023	-0.743899	5.72352
Particle_size_nm	SVR_RBF	BC, AB, AC	3	4.63388	3.28442	-0.433909	5.18995
Particle_size_nm	SVR_RBF	B2, B, logC	3	3.0458	2.04751	0.380512	3.41129
Particle_size_nm	SVR_RBF	B2, B, sqrtC	3	3.081	2.06831	0.36611	3.45072
Particle_size_nm	SVR_RBF	B2, B, C	3	3.10027	2.07365	0.358155	3.4723
Particle_size_nm	SVR_RBF	B2, B, logB	3	3.35978	2.14765	0.246204	3.76296
Particle_size_nm	SVR_RBF	B2, B, C2	3	3.12346	2.05568	0.348516	3.49828
Particle_size_nm	SVR_RBF	B2, B, AB	3	4.59766	3.08418	-0.411581	5.14938
Particle_size_nm	SVR_RBF	B2, B, AC	3	3.74047	2.84683	0.0657046	4.18933
Particle_size_nm	SVR_RBF	B2, logC, sqrtC	3	3.09153	1.92347	0.361767	3.46252
Particle_size_nm	SVR_RBF	B2, logC, C	3	3.11409	1.93321	0.352421	3.48778
Particle_size_nm	SVR_RBF	B2, logC, logB	3	3.05725	2.04038	0.375845	3.42412
Particle_size_nm	SVR_RBF	B2, logC, C2	3	3.15041	1.94475	0.337226	3.52846
Particle_size_nm	SVR_RBF	B2, logC, AB	3	4.5288	2.93351	-0.36961	5.07225
Particle_size_nm	SVR_RBF	B2, logC, AC	3	3.87234	2.53408	-0.00133225	4.33702
Particle_size_nm	SVR_RBF	B2, sqrtC, C	3	3.13125	1.93872	0.345264	3.507
Particle_size_nm	SVR_RBF	B2, sqrtC, logB	3	3.08944	2.05959	0.362632	3.46017
Particle_size_nm	SVR_RBF	B2, sqrtC, C2	3	3.16223	1.94282	0.332244	3.54169
Particle_size_nm	SVR_RBF	B2, sqrtC, AB	3	4.58818	2.99881	-0.405762	5.13876
Particle_size_nm	SVR_RBF	B2, sqrtC, AC	3	3.91222	2.56167	-0.0220653	4.38169
Particle_size_nm	SVR_RBF	B2, C, logB	3	3.11033	2.06878	0.353983	3.48357
Particle_size_nm	SVR_RBF	B2, C, C2	3	3.17386	1.93715	0.327324	3.55472
Particle_size_nm	SVR_RBF	B2, C, AB	3	4.63691	3.08137	-0.435786	5.19334
Particle_size_nm	SVR_RBF	B2, C, AC	3	3.94773	2.57417	-0.040701	4.42146
Particle_size_nm	SVR_RBF	B2, logB, C2	3	3.12472	2.05978	0.34799	3.49969
Particle_size_nm	SVR_RBF	B2, logB, AB	3	4.58942	3.08693	-0.406526	5.14015
Particle_size_nm	SVR_RBF	B2, logB, AC	3	3.76239	2.85065	0.0547205	4.21388
Particle_size_nm	SVR_RBF	B2, C2, AB	3	4.69562	3.22118	-0.472373	5.2591
Particle_size_nm	SVR_RBF	B2, C2, AC	3	4.00943	2.66301	-0.0734893	4.49057
Particle_size_nm	SVR_RBF	B2, AB, AC	3	4.18862	3.19766	-0.171582	4.69125
Particle_size_nm	SVR_RBF	B, logC, sqrtC	3	3.10238	1.97324	0.35728	3.47467
Particle_size_nm	SVR_RBF	B, logC, C	3	3.12261	1.98007	0.34887	3.49732
Particle_size_nm	SVR_RBF	B, logC, logB	3	3.05724	2.02041	0.375848	3.42411
Particle_size_nm	SVR_RBF	B, logC, C2	3	3.15492	1.97946	0.335327	3.53351
Particle_size_nm	SVR_RBF	B, logC, AB	3	4.59269	3.03297	-0.408531	5.14382
Particle_size_nm	SVR_RBF	B, logC, AC	3	3.83693	2.54303	0.0168975	4.29736
Particle_size_nm	SVR_RBF	B, sqrtC, C	3	3.13752	1.97977	0.342637	3.51403
Particle_size_nm	SVR_RBF	B, sqrtC, logB	3	3.0876	2.03978	0.363389	3.45812
Particle_size_nm	SVR_RBF	B, sqrtC, C2	3	3.16593	1.9754	0.330679	3.54584
Particle_size_nm	SVR_RBF	B, sqrtC, AB	3	4.65628	3.09875	-0.447805	5.21504
Particle_size_nm	SVR_RBF	B, sqrtC, AC	3	3.88782	2.53261	-0.0093561	4.35436
Particle_size_nm	SVR_RBF	B, C, logB	3	3.11503	2.05986	0.352029	3.48883
Particle_size_nm	SVR_RBF	B, C, C2	3	3.18196	1.97956	0.323886	3.56379
Particle_size_nm	SVR_RBF	B, C, AB	3	4.71497	3.15305	-0.484534	5.28077
Particle_size_nm	SVR_RBF	B, C, AC	3	3.93295	2.59065	-0.0329246	4.40491
[truncated: 7,001 more rows]

## Sheet: Best_Subsets
Response	Model	Descriptors	Number_of_descriptors	LOOCV_RMSE	LOOCV_MAE	LOOCV_R2	Penalized_score
Zeta_potential_mV	Extra_Trees	BC, A2	2	1.04004	0.882904	0.355002	1.12325
Zeta_potential_mV	Descriptor_ElasticNet	C2, logB, A2, A_div_B	4	1.0187	0.846981	0.381196	1.1817
Zeta_potential_mV	Random_Forest	BC, A2	2	1.09509	0.900581	0.284923	1.18269
Zeta_potential_mV	SVR_RBF	BC, A2	2	1.13818	0.867089	0.22753	1.22924
Zeta_potential_mV	Gaussian_Process	BC, A2	2	1.1711	0.900087	0.182203	1.26479
Zeta_potential_mV	Gradient_Boosting	BC, logB, A2	3	1.20294	0.895896	0.137135	1.34729
Zeta_potential_mV	Descriptor_Ridge	sqrtC, logB	2	1.31575	1.01868	-0.0322972	1.42101
Zeta_potential_mV	Kernel_Ridge_RBF	sqrtC, logC	2	1.48912	1.16045	-0.322254	1.60825
Particle_size_nm	SVR_RBF	B2, logC	2	3.10251	2.05754	0.357225	3.35072
Particle_size_nm	Descriptor_ElasticNet	BC, B2, logB, C2	4	2.88976	2.1502	0.442358	3.35212
Particle_size_nm	Gradient_Boosting	BC, B2, sqrtC, AC	4	2.96438	2.02122	0.413189	3.43868
Particle_size_nm	Extra_Trees	BC, B2, logB, AC	4	3.01772	2.00017	0.39188	3.50055
Particle_size_nm	Random_Forest	B2, logB	2	3.59307	2.71359	0.137889	3.88052
Particle_size_nm	Gaussian_Process	BC, B2, B, AC	4	3.40227	2.17905	0.22702	3.94663
Particle_size_nm	Descriptor_Ridge	B2, logB	2	3.83939	2.4711	0.015634	4.14654
Particle_size_nm	Kernel_Ridge_RBF	B2, B	2	4.60558	3.4493	-0.416447	4.97403
Entrapment_efficiency_percent	SVR_RBF	sqrtC, C, C2, A2	4	4.34396	3.4706	0.599063	5.039
Entrapment_efficiency_percent	Gaussian_Process	C, A2, A_div_B	3	4.97859	3.99932	0.473358	5.57602
Entrapment_efficiency_percent	Extra_Trees	C, A_div_B, AC	3	5.29569	3.85495	0.404133	5.93118
Entrapment_efficiency_percent	Gradient_Boosting	sqrtC, A2	2	5.59775	4.48752	0.33422	6.04557
Entrapment_efficiency_percent	Random_Forest	A2, AC	2	5.77726	4.65517	0.290835	6.23944
Entrapment_efficiency_percent	Descriptor_ElasticNet	logC, A2, A	3	5.96265	4.83881	0.244592	6.67816
Entrapment_efficiency_percent	Descriptor_Ridge	logC, sqrtC	2	6.43505	4.92283	0.120152	6.94986
Entrapment_efficiency_percent	Kernel_Ridge_RBF	A2, A	2	7.03991	5.51472	-0.0530236	7.60311

## Sheet: QbD_RSM_Results
Response	Model	Train_RMSE	Train_MAE	Train_R2	LOOCV_RMSE	LOOCV_MAE	LOOCV_R2	Selected_descriptors	Equation
Particle_size_nm	QbD_RSM	0.277928	0.231235	0.994842	0.725482	0.618235	0.964853	A, B, C with quadratic RSM terms	80.971000 + (-17.803250 * X1_HAP_DZ_ratio) + (4.301100 * X2_Dispersion_volume_mL) + (-0.197375 * X3_Loading_time_h) + (2.699250 * X1_HAP_DZ_ratio^2) + (-0.031000 * X1_HAP_DZ_ratio X2_Dispersion_volume_mL) + (0.422083 * X1_HAP_DZ_ratio X3_Loading_time_h) + (-0.043183 * X2_Dispersion_volume_mL^2) + (-0.055833 * X2_Dispersion_volume_mL X3_Loading_time_h) + (0.035118 * X3_Loading_time_h^2)
Entrapment_efficiency_percent	QbD_RSM	3.43287	2.84841	0.749609	10.9756	8.49353	-1.55951	A, B, C with quadratic RSM terms	0.038000 + (40.939000 * X1_HAP_DZ_ratio) + (0.598175 * X2_Dispersion_volume_mL) + (1.410792 * X3_Loading_time_h) + (-6.839750 * X1_HAP_DZ_ratio^2) + (-0.027000 * X1_HAP_DZ_ratio X2_Dispersion_volume_mL) + (-0.767500 * X1_HAP_DZ_ratio X3_Loading_time_h) + (-0.013572 * X2_Dispersion_volume_mL^2) + (0.036375 * X2_Dispersion_volume_mL X3_Loading_time_h) + (-0.010618 * X3_Loading_time_h^2)
Zeta_potential_mV	QbD_RSM	0.514505	0.434294	0.842154	1.78917	1.35088	-0.908801	A, B, C with quadratic RSM terms	5.349250 + (-10.563500 * X1_HAP_DZ_ratio) + (-0.672075 * X2_Dispersion_volume_mL) + (0.000375 * X3_Loading_time_h) + (1.606500 * X1_HAP_DZ_ratio^2) + (0.088750 * X1_HAP_DZ_ratio X2_Dispersion_volume_mL) + (0.040417 * X1_HAP_DZ_ratio X3_Loading_time_h) + (0.006040 * X2_Dispersion_volume_mL^2) + (-0.002833 * X2_Dispersion_volume_mL X3_Loading_time_h) + (-0.002528 * X3_Loading_time_h^2)

## Sheet: Descriptor_Model_Results
Response	Model	Selected_descriptors	Number_of_descriptors	Train_RMSE	Train_MAE	Train_R2	LOOCV_RMSE	LOOCV_MAE	LOOCV_R2	Penalized_score
Particle_size_nm	Descriptor_Ridge	B2, logB	2	3.32458	2.1338	0.261917	3.83939	2.4711	0.015634	4.14654
Particle_size_nm	Descriptor_ElasticNet	BC, B2, logB, C2	4	2.03356	1.48732	0.723851	2.88976	2.1502	0.442358	3.35212
Particle_size_nm	Random_Forest	B2, logB	2	2.91673	2.22707	0.4319	3.59307	2.71359	0.137889	3.88052
Particle_size_nm	Gradient_Boosting	BC, B2, sqrtC, AC	4	0.226542	0.142615	0.996573	2.96438	2.02122	0.413189	3.43868
Particle_size_nm	Extra_Trees	BC, B2, logB, AC	4	0.221694	0.111529	0.996718	3.01772	2.00017	0.39188	3.50055
Particle_size_nm	SVR_RBF	B2, logC	2	1.83991	0.852572	0.77394	3.10251	2.05754	0.357225	3.35072
Particle_size_nm	Kernel_Ridge_RBF	B2, B	2	3.68431	2.7417	0.0935511	4.60558	3.4493	-0.416447	4.97403
Particle_size_nm	Gaussian_Process	BC, B2, B, AC	4	0.227959	0.145201	0.99653	3.40227	2.17905	0.22702	3.94663
Entrapment_efficiency_percent	Descriptor_Ridge	logC, sqrtC	2	5.62699	4.37578	0.327246	6.43505	4.92283	0.120152	6.94986
Entrapment_efficiency_percent	Descriptor_ElasticNet	logC, A2, A	3	4.44175	3.70488	0.580809	5.96265	4.83881	0.244592	6.67816
Entrapment_efficiency_percent	Random_Forest	A2, AC	2	3.22919	2.5791	0.77844	5.77726	4.65517	0.290835	6.23944
Entrapment_efficiency_percent	Gradient_Boosting	sqrtC, A2	2	2.9064	2.06048	0.82052	5.59775	4.48752	0.33422	6.04557
Entrapment_efficiency_percent	Extra_Trees	C, A_div_B, AC	3	2.1717	1.05459	0.899792	5.29569	3.85495	0.404133	5.93118
Entrapment_efficiency_percent	SVR_RBF	sqrtC, C, C2, A2	4	3.62365	2.16997	0.721005	4.34396	3.4706	0.599063	5.039
Entrapment_efficiency_percent	Kernel_Ridge_RBF	A2, A	2	5.95718	4.643	0.245977	7.03991	5.51472	-0.0530236	7.60311
Entrapment_efficiency_percent	Gaussian_Process	C, A2, A_div_B	3	2.63215	2.03457	0.852795	4.97859	3.99932	0.473358	5.57602
Zeta_potential_mV	Descriptor_Ridge	sqrtC, logB	2	1.10111	0.85372	0.277031	1.31575	1.01868	-0.0322972	1.42101
Zeta_potential_mV	Descriptor_ElasticNet	C2, logB, A2, A_div_B	4	0.730093	0.594099	0.682157	1.0187	0.846981	0.381196	1.1817
Zeta_potential_mV	Random_Forest	BC, A2	2	0.470922	0.414182	0.867763	1.09509	0.900581	0.284923	1.18269
Zeta_potential_mV	Gradient_Boosting	BC, logB, A2	3	0.267878	0.148278	0.957211	1.20294	0.895896	0.137135	1.34729
Zeta_potential_mV	Extra_Trees	BC, A2	2	0.295728	0.162745	0.947852	1.04004	0.882904	0.355002	1.12325
Zeta_potential_mV	SVR_RBF	BC, A2	2	0.476848	0.295677	0.864414	1.13818	0.867089	0.22753	1.22924
Zeta_potential_mV	Kernel_Ridge_RBF	sqrtC, logC	2	1.2344	0.965035	0.0914101	1.48912	1.16045	-0.322254	1.60825
Zeta_potential_mV	Gaussian_Process	BC, A2	2	0.391787	0.333326	0.908471	1.1711	0.900087	0.182203	1.26479

## Sheet: Descriptor_External
Response	Model	Selected_descriptors	Experimental_external	Predicted_external	Absolute_error	Percent_error
Particle_size_nm	Descriptor_Ridge	B2, logB	129.3	136.67	7.37011	5.70001
Particle_size_nm	Descriptor_ElasticNet	BC, B2, logB, C2	129.3	133.543	4.24258	3.28119
Particle_size_nm	Random_Forest	B2, logB	129.3	134.826	5.52563	4.27349
Particle_size_nm	Gradient_Boosting	BC, B2, sqrtC, AC	129.3	134.614	5.31351	4.10945
Particle_size_nm	Extra_Trees	BC, B2, logB, AC	129.3	133.575	4.27487	3.30616
Particle_size_nm	SVR_RBF	B2, logC	129.3	132.059	2.75855	2.13345
Particle_size_nm	Kernel_Ridge_RBF	B2, B	129.3	131.868	2.568	1.98608
Particle_size_nm	Gaussian_Process	BC, B2, B, AC	129.3	131.42	2.11959	1.63928
Entrapment_efficiency_percent	Descriptor_Ridge	logC, sqrtC	87.22	73.1445	14.0755	16.1379
Entrapment_efficiency_percent	Descriptor_ElasticNet	logC, A2, A	87.22	75.6991	11.5209	13.209
Entrapment_efficiency_percent	Random_Forest	A2, AC	87.22	75.1653	12.0547	13.8211
Entrapment_efficiency_percent	Gradient_Boosting	sqrtC, A2	87.22	74.9938	12.2262	14.0176
Entrapment_efficiency_percent	Extra_Trees	C, A_div_B, AC	87.22	77.7074	9.51255	10.9064
Entrapment_efficiency_percent	SVR_RBF	sqrtC, C, C2, A2	87.22	75.0686	12.1514	13.9319
Entrapment_efficiency_percent	Kernel_Ridge_RBF	A2, A	87.22	73.6971	13.5229	15.5044
Entrapment_efficiency_percent	Gaussian_Process	C, A2, A_div_B	87.22	78.5059	8.71413	9.99097
Zeta_potential_mV	Descriptor_Ridge	sqrtC, logB	-20.9	-20.7063	0.193686	0.926729
Zeta_potential_mV	Descriptor_ElasticNet	C2, logB, A2, A_div_B	-20.9	-21.2405	0.340538	1.62937
Zeta_potential_mV	Random_Forest	BC, A2	-20.9	-20.3643	0.535722	2.56326
Zeta_potential_mV	Gradient_Boosting	BC, logB, A2	-20.9	-20.0099	0.890083	4.25877
Zeta_potential_mV	Extra_Trees	BC, A2	-20.9	-21.4911	0.591067	2.82807
Zeta_potential_mV	SVR_RBF	BC, A2	-20.9	-21.7122	0.812183	3.88604
Zeta_potential_mV	Kernel_Ridge_RBF	sqrtC, logC	-20.9	-21.3222	0.422196	2.02007
Zeta_potential_mV	Gaussian_Process	BC, A2	-20.9	-20.4473	0.452667	2.16587

## Sheet: Final_Model_Comparison
Response	Model	Selected_descriptors	Train_RMSE	Train_MAE	Train_R2	LOOCV_RMSE	LOOCV_MAE	LOOCV_R2	Experimental_external	Predicted_external	Absolute_error	Percent_error
Particle_size_nm	QbD_RSM	A, B, C with quadratic RSM terms	0.277928	0.231235	0.994842	0.725482	0.618235	0.964853	129.3	131.31	2.00997	1.5545
Entrapment_efficiency_percent	QbD_RSM	A, B, C with quadratic RSM terms	3.43287	2.84841	0.749609	10.9756	8.49353	-1.55951	87.22	77.4781	9.74189	11.1693
Zeta_potential_mV	QbD_RSM	A, B, C with quadratic RSM terms	0.514505	0.434294	0.842154	1.78917	1.35088	-0.908801	-20.9	-21.2008	0.300778	1.43913
Particle_size_nm	Descriptor_Ridge	B2, logB	3.32458	2.1338	0.261917	3.83939	2.4711	0.015634	129.3	136.67	7.37011	5.70001
Particle_size_nm	Descriptor_ElasticNet	BC, B2, logB, C2	2.03356	1.48732	0.723851	2.88976	2.1502	0.442358	129.3	133.543	4.24258	3.28119
Particle_size_nm	Random_Forest	B2, logB	2.91673	2.22707	0.4319	3.59307	2.71359	0.137889	129.3	134.826	5.52563	4.27349
Particle_size_nm	Gradient_Boosting	BC, B2, sqrtC, AC	0.226542	0.142615	0.996573	2.96438	2.02122	0.413189	129.3	134.614	5.31351	4.10945
Particle_size_nm	Extra_Trees	BC, B2, logB, AC	0.221694	0.111529	0.996718	3.01772	2.00017	0.39188	129.3	133.575	4.27487	3.30616
Particle_size_nm	SVR_RBF	B2, logC	1.83991	0.852572	0.77394	3.10251	2.05754	0.357225	129.3	132.059	2.75855	2.13345
Particle_size_nm	Kernel_Ridge_RBF	B2, B	3.68431	2.7417	0.0935511	4.60558	3.4493	-0.416447	129.3	131.868	2.568	1.98608
Particle_size_nm	Gaussian_Process	BC, B2, B, AC	0.227959	0.145201	0.99653	3.40227	2.17905	0.22702	129.3	131.42	2.11959	1.63928
Entrapment_efficiency_percent	Descriptor_Ridge	logC, sqrtC	5.62699	4.37578	0.327246	6.43505	4.92283	0.120152	87.22	73.1445	14.0755	16.1379
Entrapment_efficiency_percent	Descriptor_ElasticNet	logC, A2, A	4.44175	3.70488	0.580809	5.96265	4.83881	0.244592	87.22	75.6991	11.5209	13.209
Entrapment_efficiency_percent	Random_Forest	A2, AC	3.22919	2.5791	0.77844	5.77726	4.65517	0.290835	87.22	75.1653	12.0547	13.8211
Entrapment_efficiency_percent	Gradient_Boosting	sqrtC, A2	2.9064	2.06048	0.82052	5.59775	4.48752	0.33422	87.22	74.9938	12.2262	14.0176
Entrapment_efficiency_percent	Extra_Trees	C, A_div_B, AC	2.1717	1.05459	0.899792	5.29569	3.85495	0.404133	87.22	77.7074	9.51255	10.9064
Entrapment_efficiency_percent	SVR_RBF	sqrtC, C, C2, A2	3.62365	2.16997	0.721005	4.34396	3.4706	0.599063	87.22	75.0686	12.1514	13.9319
Entrapment_efficiency_percent	Kernel_Ridge_RBF	A2, A	5.95718	4.643	0.245977	7.03991	5.51472	-0.0530236	87.22	73.6971	13.5229	15.5044
Entrapment_efficiency_percent	Gaussian_Process	C, A2, A_div_B	2.63215	2.03457	0.852795	4.97859	3.99932	0.473358	87.22	78.5059	8.71413	9.99097
Zeta_potential_mV	Descriptor_Ridge	sqrtC, logB	1.10111	0.85372	0.277031	1.31575	1.01868	-0.0322972	-20.9	-20.7063	0.193686	0.926729
Zeta_potential_mV	Descriptor_ElasticNet	C2, logB, A2, A_div_B	0.730093	0.594099	0.682157	1.0187	0.846981	0.381196	-20.9	-21.2405	0.340538	1.62937
Zeta_potential_mV	Random_Forest	BC, A2	0.470922	0.414182	0.867763	1.09509	0.900581	0.284923	-20.9	-20.3643	0.535722	2.56326
Zeta_potential_mV	Gradient_Boosting	BC, logB, A2	0.267878	0.148278	0.957211	1.20294	0.895896	0.137135	-20.9	-20.0099	0.890083	4.25877
Zeta_potential_mV	Extra_Trees	BC, A2	0.295728	0.162745	0.947852	1.04004	0.882904	0.355002	-20.9	-21.4911	0.591067	2.82807
Zeta_potential_mV	SVR_RBF	BC, A2	0.476848	0.295677	0.864414	1.13818	0.867089	0.22753	-20.9	-21.7122	0.812183	3.88604
Zeta_potential_mV	Kernel_Ridge_RBF	sqrtC, logC	1.2344	0.965035	0.0914101	1.48912	1.16045	-0.322254	-20.9	-21.3222	0.422196	2.02007
Zeta_potential_mV	Gaussian_Process	BC, A2	0.391787	0.333326	0.908471	1.1711	0.900087	0.182203	-20.9	-20.4473	0.452667	2.16587

[truncated: 13 more sheets: Best_Model_Per_Response, Best_AI_For_XAI, QbD_Predictions, Descriptor_Predictions, Symbolic_Regression, Symbolic_Predictions, Surrogate_Equations, Surrogate_External, Surrogate_Coefficients, Surrogate_Predictions, SHAP_Importance, LIME_Optimized_Batch, Permutation_Importance]
